# Supplementary material for: Idiosyncratic changes in spring arrival dates of Pacific Northwest migratory birds
Source: PeerJ. 2019 Nov 7;7:e7999. doi: 10.7717/peerj.7999 (PMC6842555; doi:10.7717/peerj.7999)
Supplement: Supplemental Information 3 [file peerj-07-7999-s003.xlsx]

## Sheet: Sheet1
Species	Year	ArrivalDate	rainCorvallis_annual	rainAprilcm	rainMaycm	AprAvT_C	AprmaxT_C	AprminT_C	MayavgT_C	MaymaxT_C	MayminT_C	PDOFeb	PDOMarch	PDOApril	PDOMay	ensoFeb	ensoMarch	ensoApr	meiFebMar	meiMarApr	meiAprMay	SACrainFeb	SACrainMar	SACrainApr	CorRain	CorAvgT_C	CorMaxT_C	CorMinT_C	PDO	ENSO	MEI	SacRain	JanAvgT_C	JanMaxT_C	JanMinT_C	FebAvgT_C	FebMaxT_C	FebMinT_C	DecAvgT_C	DecMaxT_C	DecMinT_C	BelowFrzJan	BelowFrzFeb	BelowFrzDec	WinterAvgT_C	WinterMaxT_C	WinterMinT_C	WinterDaysBelowAvg	JanAvg_1Lag
amgo	1985	104	68.961	2.667	2.3876	11.1667	25.5556	0	12.7778	28.8889	-2.22222	0.94	0.57	0.19	0	1.2	0.8	1.2	-0.696	-0.468	-0.706	3.8608	5.1054	0	2.3876	12.7778	28.8889	-2.22222	0.19	1.2	-0.706	0	1.22222	5.55556	-3.05556	3.5	8.22222	-1.22222	2	5.66667	-1.66667	30	22	25	2.24074	6.48148	-1.98148	77	4.66667
amgo	1986	115	111.125	4.6736	6.35	9.55556	26.1111	-1.11111	12.8333	31.6667	1.66667	1.61	2.18	1.55	1.16	-1	0.5	0.3	0.028	-0.107	0.353	21.844	8.128	2.3114	6.35	12.8333	31.6667	1.66667	1.55	0.3	0.353	2.3114	4.72222	8.33333	1.11111	5.72222	9.22222	2.27778	-0.222222	3.72222	-4.16667	16	10	27	3.40741	7.09259	-0.259259	53	1.22222
amgo	1987	113	95.7834	3.9624	3.556	11.5556	28.3333	-0.555556	14.5556	33.3333	1.11111	1.75	2.1	2.16	1.85	-1.3	-1.4	-1.3	1.716	1.855	2.107	8.2042	7.747	0.508	3.556	14.5556	33.3333	1.11111	2.16	-1.3	2.107	0.508	3	6.72222	-0.722222	5.66667	10	1.27778	2.66667	6	-0.722222	17	10	21	3.77778	7.57407	-0.0555556	48	4.72222
amgo	1988	130	95.3008	8.4582	9.7536	10.8333	25.5556	-0.555556	12.2222	30	1.66667	1.24	1.42	0.94	1.2	-0.4	0.6	0.1	0.495	0.389	0.193	2.5146	0.4318	4.0132	9.7536	12.2222	30	1.66667	0.94	0.1	0.193	4.0132	2.77778	5.83333	-0.222222	5.33333	10.0556	0.666667	2.72222	5.22222	0.166667	21	15	20	3.61111	7.03704	0.203704	56	3
amgo	1989	124	75.2856	3.6068	3.7084	12.6667	26.6667	1.11111	13	26.6667	1.66667	-1.02	-0.83	-0.32	0.47	1.2	1.1	1.6	-1.035	-0.76	-0.393	3.175	15.9766	0.7874	3.7084	13	26.6667	1.66667	-0.32	1.6	-0.393	0.7874	3.94444	7.38889	0.555556	0.666667	5	-3.72222	3.38889	6.66667	0.111111	18	21	18	2.66667	6.35185	-1.01852	57	2.77778
amgo	1996	114	185.953	12.5222	10.1092	11.1667	26.1111	1.66667	11.8333	26.1111	-1.11111	0.75	1.01	1.46	2.18	0.3	1.1	0.8	-0.236	-0.391	-0.041	13.9446	4.3942	3.175	10.1092	11.8333	26.1111	-1.11111	1.46	0.8	-0.041	3.175	4.83333	7.72222	2	4.66667	8.72222	0.555556	4.83333	7.72222	1.94444	10	15	9	4.77778	8.05556	1.5	34	5.77778
amgo	1997	111	113.411	9.144	5.588	10.0556	23.3333	-0.555556	15.5556	31.6667	2.22222	0.28	0.65	1.05	1.83	1.7	-0.4	-0.6	-0.248	0.527	1.132	0.7112	0.8636	0.4572	5.588	15.5556	31.6667	2.22222	1.05	-0.6	1.132	0.4572	3.88889	7.38889	0.333333	4.83333	9.61111	0.111111	4.5	7.83333	1.11111	16	15	13	4.40741	8.27778	0.518519	44	4.83333
amgo	1998	113	152.425	4.6482	14.732	9.83333	28.3333	-0.555556	12.4444	27.7778	2.22222	1.56	2.01	1.27	0.7	-2	-2.4	-1.4	2.751	2.658	2.206	25.273	6.2738	2.667	14.732	12.4444	27.7778	2.22222	1.27	-1.4	2.206	2.667	5.61111	8.77778	2.44444	6.11111	10.0556	2.16667	3.27778	6.88889	-0.388889	7	7	22	5	8.57407	1.40741	36	3.88889
amgo	1999	113	126.492	2.7178	5.0546	9.5	27.2222	-1.11111	11.5556	30.5556	1.11111	-0.66	-0.33	-0.41	-0.68	1	1.3	1.4	-0.95	-0.88	-0.596	11.303	3.81	2.2606	5.0546	11.5556	30.5556	1.11111	-0.41	1.4	-0.596	2.2606	5.05556	7.72222	2.38889	5.11111	8.38889	1.88889	3.55556	6.55556	0.5	8	8	14	4.57407	7.55556	1.59259	30	5.61111
amgo	2000	107	88.6968	4.1402	7.5946	10.8889	25	-2.22222	13.2778	26.6667	1.11111	-0.83	0.29	0.35	-0.05	1.7	1.3	1.2	-1.09	-0.397	0.251	21.5646	5.1562	3.5306	7.5946	13.2778	26.6667	1.11111	0.35	1.2	0.251	3.5306	3.33333	6.33333	0.277778	5.55556	9.5	1.61111	4.83333	8.22222	1.44444	18	13	11	4.57407	8.01852	1.11111	42	5.05556
amgo	2001	114	85.217	5.9182	2.8194	8.66667	26.1111	-2.22222	13.6111	33.8889	0	0.29	0.45	-0.31	-0.3	1.7	0.9	0.2	-0.548	-0.05	0.282	11.6078	5.1816	3.81	2.8194	13.6111	33.8889	0	-0.31	0.2	0.282	3.81	4.05556	7.83333	0.222222	4.83333	9.88889	-0.222222	3.88889	7.16667	0.666667	17	17	16	4.25926	8.2963	0.222222	50	3.33333
amgo	2002	113	110.414	4.699	4.445	10.3333	23.3333	-0.555556	12	27.7778	-0.555556	-0.64	-0.43	-0.32	-0.63	1.1	-0.2	-0.1	-0.118	0.401	0.886	2.8702	7.2898	0.3048	4.445	12	27.7778	-0.555556	-0.32	-0.1	0.886	0.3048	4.66667	7.33333	2	5.77778	10.6111	0.944444	4.55556	7.22222	1.88889	12	17	4	5	8.38889	1.61111	33	4.05556
amgo	2003	109	119.05	16.4592	3.3782	9.66667	20.5556	1.11111	13	28.8889	0	1.75	1.51	1.18	0.89	-0.7	-0.3	-0.1	0.83	0.413	0.214	3.2766	4.7498	6.4262	3.3782	13	28.8889	0	1.18	-0.1	0.214	6.4262	6.72222	10.2222	3.16667	5.88889	10.8889	0.888889	5.33333	8.22222	2.44444	12	16	6	5.98148	9.77778	2.16667	34	4.66667
amgo	2004	107	104.14	7.62	3.302	10.1667	25.2657	-0.676328	13.9444	28.8889	2.22222	0.48	0.61	0.57	0.88	1.2	0.4	-0.9	-0.306	0.358	0.558	12.7254	1.2192	0.2286	3.302	13.9444	28.8889	2.22222	0.57	-0.9	0.558	0.2286	3.88889	6.72222	1.11111	5.88889	9.83333	2	5.05556	7.77778	2.27778	13	7	8	4.94444	8.11111	1.7963	28	6.72222
amgo	2005	111	99.3648	6.6802	10.7696	10.0556	25	-0.555556	14.2222	32.2222	3.33333	0.81	1.36	1.03	1.86	-3.1	0.3	-0.6	1.057	0.626	0.885	5.9182	8.382	2.1336	10.7696	14.2222	32.2222	3.33333	1.03	-0.6	0.885	2.1336	5	8.55556	1.44444	5.22222	10.5556	-0.0555556	5.44444	8.44444	2.5	13	17	5	5.22222	9.18519	1.2963	35	3.88889
amgo	2006	101	135.636	6.35	6.223	10.6667	26.6667	-0.555556	14	33.8889	1.11111	0.66	0.05	0.4	0.48	0.1	1.8	1.1	-0.521	-0.571	0.045	5.3086	13.4366	8.3058	6.223	14	33.8889	1.11111	0.4	1.1	0.045	8.3058	5.88889	8.94444	2.83333	4.61111	9.83333	-0.666667	3.22222	6.27778	0.166667	5	18	18	4.57407	8.35185	0.777778	41	5
amgo	2007	110	95.6056	5.08	4.0894	9.72222	25	-1.11111	12.8889	30	1.11111	0.04	-0.36	0.16	-0.1	-0.1	0.2	-0.1	0.125	0.026	0.348	11.2776	0.889	3.4036	4.0894	12.8889	30	1.11111	0.16	-0.1	0.348	3.4036	2.44444	6.33333	-1.5	5.94444	9.83333	2	3.5	6.72222	0.277778	24	10	20	3.96296	7.62963	0.259259	54	5.88889
amgo	2008	108	86.4616	6.0452	0.9652	8.05556	26.6667	-1.66667	13.3889	34.4444	0.555556	-0.77	-0.71	-1.52	-1.37	2.6	1.4	0.7	-1.552	-0.858	-0.345	4.5974	0.127	0	0.9652	13.3889	34.4444	0.555556	-1.52	0.7	-0.345	0	1.83333	5.22222	-1.66667	5.11111	10.3889	-0.166667	4	7.38889	0.611111	24	21	17	3.64815	7.66667	-0.407407	62	2.44444
amgo	2009	108	89.2556	3.2766	9.271	9.27778	26.6667	-2.22222	13.2222	30.5556	1.66667	-1.55	-1.59	-1.65	-0.88	1.9	0.4	0.8	-0.705	-0.106	0.326	12.8778	5.3086	3.7084	9.271	13.2222	30.5556	1.66667	-1.65	0.8	0.326	3.7084	2.38889	7.44444	-2.66667	3.55556	9.55556	-2.44444	1.55556	6.44444	-3.33333	24	24	26	2.5	7.81481	-2.81481	74	1.83333
amgo	2010	108	130.785	11.1252	8.382	9.38889	22.2222	-1.66667	11.6667	24.4444	0	0.82	0.44	0.78	0.62	-1.5	-0.7	1.2	1.462	0.978	0.658	5.8166	7.5692	6.731	8.382	11.6667	24.4444	0	0.78	1.2	0.658	6.731	4.55556	10.2222	-1.16667	4.77778	11.6111	-2	-0.444444	5.55556	-6.44444	27	20	25	2.96296	9.12963	-3.2037	72	2.38889
amgo	2011	112	93.98	10.3124	9.0678	8.22222	20	-1.66667	11.5556	23.8889	0	-0.83	-0.69	-0.42	-0.37	2.7	2.5	1.9	-1.554	-1.387	-0.199	8.6106	17.653	0.1524	9.0678	11.5556	23.8889	0	-0.42	1.9	-0.199	0.1524	4.66667	8.16667	1.11111	4.27778	9.16667	-0.666667	5.33333	8.66667	2.05556	14	18	8	4.75926	8.66667	0.833333	40	4.55556
amgo	2012	99	149.301	11.4808	7.0866	10.8889	26.6667	0	12.6667	28.8889	0.555556	-0.85	-1.05	-0.27	-1.26	0.5	0.7	-0.3	-0.382	0.11	0.757	2.3368	10.3124	6.1468	7.0866	12.6667	28.8889	0.555556	-0.27	-0.3	0.757	6.1468	3.77778	8.16667	-0.555556	5.05556	10.2222	-0.111111	2.38889	6.77778	-1.94444	19	18	26	3.74074	8.38889	-0.87037	63	4.66667
amgo	2013	110	64.3128	5.0546	6.2484	10.9444	25.5556	-1.11111	14.3889	29.4444	3.33333	-0.43	-0.63	-0.16	0.08	-0.2	1.5	0.2	-0.026	0.09	0.205	0.9144	3.5052	1.7526	6.2484	14.3889	29.4444	3.33333	-0.16	0.2	0.205	1.7526	1.11111	5	-2.83333	4.38889	9.44444	-0.722222	4.16667	7.94444	0.333333	26	20	16	3.22222	7.46296	-1.07407	62	3.77778
amgo	2014	100	116.738	7.6708	6.6548	10.7222	24.4444	0.555556	14.6667	31.1111	1.11111	0.38	0.97	1.13	1.8	0.1	-0.9	0.8	0.018	0.295	1.001	10.5156	4.4958	4.6482	6.6548	14.6667	31.1111	1.11111	1.13	0.8	1.001	4.6482	2.83333	7.88889	-2.27778	3.38889	8.66667	-1.83333	0.0555556	5.05556	-5	25	21	27	2.09259	7.2037	-3.03704	73	1.11111
bhgr	1985	136	68.961	2.667	2.3876	11.1667	25.5556	0	12.7778	28.8889	-2.22222	0.94	0.57	0.19	0	1.2	0.8	1.2	-0.696	-0.468	-0.706	3.8608	5.1054	0	2.3876	12.7778	28.8889	-2.22222	0.19	1.2	-0.706	0	1.22222	5.55556	-3.05556	3.5	8.22222	-1.22222	2	5.66667	-1.66667	30	22	25	2.24074	6.48148	-1.98148	77	4.66667
bhgr	1986	136	111.125	4.6736	6.35	9.55556	26.1111	-1.11111	12.8333	31.6667	1.66667	1.61	2.18	1.55	1.16	-1	0.5	0.3	0.028	-0.107	0.353	21.844	8.128	2.3114	6.35	12.8333	31.6667	1.66667	1.55	0.3	0.353	2.3114	4.72222	8.33333	1.11111	5.72222	9.22222	2.27778	-0.222222	3.72222	-4.16667	16	10	27	3.40741	7.09259	-0.259259	53	1.22222
bhgr	1987	121	95.7834	3.9624	3.556	11.5556	28.3333	-0.555556	14.5556	33.3333	1.11111	1.75	2.1	2.16	1.85	-1.3	-1.4	-1.3	1.716	1.855	2.107	8.2042	7.747	0.508	3.556	14.5556	33.3333	1.11111	2.16	-1.3	2.107	0.508	3	6.72222	-0.722222	5.66667	10	1.27778	2.66667	6	-0.722222	17	10	21	3.77778	7.57407	-0.0555556	48	4.72222
bhgr	1988	129	95.3008	8.4582	9.7536	10.8333	25.5556	-0.555556	12.2222	30	1.66667	1.24	1.42	0.94	1.2	-0.4	0.6	0.1	0.495	0.389	0.193	2.5146	0.4318	4.0132	9.7536	12.2222	30	1.66667	0.94	0.1	0.193	4.0132	2.77778	5.83333	-0.222222	5.33333	10.0556	0.666667	2.72222	5.22222	0.166667	21	15	20	3.61111	7.03704	0.203704	56	3
bhgr	1989	125	75.2856	3.6068	3.7084	12.6667	26.6667	1.11111	13	26.6667	1.66667	-1.02	-0.83	-0.32	0.47	1.2	1.1	1.6	-1.035	-0.76	-0.393	3.175	15.9766	0.7874	3.7084	13	26.6667	1.66667	-0.32	1.6	-0.393	0.7874	3.94444	7.38889	0.555556	0.666667	5	-3.72222	3.38889	6.66667	0.111111	18	21	18	2.66667	6.35185	-1.01852	57	2.77778
bhgr	1996	127	185.953	12.5222	10.1092	11.1667	26.1111	1.66667	11.8333	26.1111	-1.11111	0.75	1.01	1.46	2.18	0.3	1.1	0.8	-0.236	-0.391	-0.041	13.9446	4.3942	3.175	10.1092	11.8333	26.1111	-1.11111	1.46	0.8	-0.041	3.175	4.83333	7.72222	2	4.66667	8.72222	0.555556	4.83333	7.72222	1.94444	10	15	9	4.77778	8.05556	1.5	34	5.77778
bhgr	1997	128	113.411	9.144	5.588	10.0556	23.3333	-0.555556	15.5556	31.6667	2.22222	0.28	0.65	1.05	1.83	1.7	-0.4	-0.6	-0.248	0.527	1.132	0.7112	0.8636	0.4572	5.588	15.5556	31.6667	2.22222	1.05	-0.6	1.132	0.4572	3.88889	7.38889	0.333333	4.83333	9.61111	0.111111	4.5	7.83333	1.11111	16	15	13	4.40741	8.27778	0.518519	44	4.83333
bhgr	1998	127	152.425	4.6482	14.732	9.83333	28.3333	-0.555556	12.4444	27.7778	2.22222	1.56	2.01	1.27	0.7	-2	-2.4	-1.4	2.751	2.658	2.206	25.273	6.2738	2.667	14.732	12.4444	27.7778	2.22222	1.27	-1.4	2.206	2.667	5.61111	8.77778	2.44444	6.11111	10.0556	2.16667	3.27778	6.88889	-0.388889	7	7	22	5	8.57407	1.40741	36	3.88889
bhgr	1999	119	126.492	2.7178	5.0546	9.5	27.2222	-1.11111	11.5556	30.5556	1.11111	-0.66	-0.33	-0.41	-0.68	1	1.3	1.4	-0.95	-0.88	-0.596	11.303	3.81	2.2606	5.0546	11.5556	30.5556	1.11111	-0.41	1.4	-0.596	2.2606	5.05556	7.72222	2.38889	5.11111	8.38889	1.88889	3.55556	6.55556	0.5	8	8	14	4.57407	7.55556	1.59259	30	5.61111
bhgr	2000	121	88.6968	4.1402	7.5946	10.8889	25	-2.22222	13.2778	26.6667	1.11111	-0.83	0.29	0.35	-0.05	1.7	1.3	1.2	-1.09	-0.397	0.251	21.5646	5.1562	3.5306	7.5946	13.2778	26.6667	1.11111	0.35	1.2	0.251	3.5306	3.33333	6.33333	0.277778	5.55556	9.5	1.61111	4.83333	8.22222	1.44444	18	13	11	4.57407	8.01852	1.11111	42	5.05556
bhgr	2001	123	85.217	5.9182	2.8194	8.66667	26.1111	-2.22222	13.6111	33.8889	0	0.29	0.45	-0.31	-0.3	1.7	0.9	0.2	-0.548	-0.05	0.282	11.6078	5.1816	3.81	2.8194	13.6111	33.8889	0	-0.31	0.2	0.282	3.81	4.05556	7.83333	0.222222	4.83333	9.88889	-0.222222	3.88889	7.16667	0.666667	17	17	16	4.25926	8.2963	0.222222	50	3.33333
bhgr	2002	115	110.414	4.699	4.445	10.3333	23.3333	-0.555556	12	27.7778	-0.555556	-0.64	-0.43	-0.32	-0.63	1.1	-0.2	-0.1	-0.118	0.401	0.886	2.8702	7.2898	0.3048	4.445	12	27.7778	-0.555556	-0.32	-0.1	0.886	0.3048	4.66667	7.33333	2	5.77778	10.6111	0.944444	4.55556	7.22222	1.88889	12	17	4	5	8.38889	1.61111	33	4.05556
bhgr	2003	122	119.05	16.4592	3.3782	9.66667	20.5556	1.11111	13	28.8889	0	1.75	1.51	1.18	0.89	-0.7	-0.3	-0.1	0.83	0.413	0.214	3.2766	4.7498	6.4262	3.3782	13	28.8889	0	1.18	-0.1	0.214	6.4262	6.72222	10.2222	3.16667	5.88889	10.8889	0.888889	5.33333	8.22222	2.44444	12	16	6	5.98148	9.77778	2.16667	34	4.66667
bhgr	2004	120	104.14	7.62	3.302	10.1667	25.2657	-0.676328	13.9444	28.8889	2.22222	0.48	0.61	0.57	0.88	1.2	0.4	-0.9	-0.306	0.358	0.558	12.7254	1.2192	0.2286	3.302	13.9444	28.8889	2.22222	0.57	-0.9	0.558	0.2286	3.88889	6.72222	1.11111	5.88889	9.83333	2	5.05556	7.77778	2.27778	13	7	8	4.94444	8.11111	1.7963	28	6.72222
bhgr	2005	116	99.3648	6.6802	10.7696	10.0556	25	-0.555556	14.2222	32.2222	3.33333	0.81	1.36	1.03	1.86	-3.1	0.3	-0.6	1.057	0.626	0.885	5.9182	8.382	2.1336	10.7696	14.2222	32.2222	3.33333	1.03	-0.6	0.885	2.1336	5	8.55556	1.44444	5.22222	10.5556	-0.0555556	5.44444	8.44444	2.5	13	17	5	5.22222	9.18519	1.2963	35	3.88889
bhgr	2006	123	135.636	6.35	6.223	10.6667	26.6667	-0.555556	14	33.8889	1.11111	0.66	0.05	0.4	0.48	0.1	1.8	1.1	-0.521	-0.571	0.045	5.3086	13.4366	8.3058	6.223	14	33.8889	1.11111	0.4	1.1	0.045	8.3058	5.88889	8.94444	2.83333	4.61111	9.83333	-0.666667	3.22222	6.27778	0.166667	5	18	18	4.57407	8.35185	0.777778	41	5
bhgr	2007	119	95.6056	5.08	4.0894	9.72222	25	-1.11111	12.8889	30	1.11111	0.04	-0.36	0.16	-0.1	-0.1	0.2	-0.1	0.125	0.026	0.348	11.2776	0.889	3.4036	4.0894	12.8889	30	1.11111	0.16	-0.1	0.348	3.4036	2.44444	6.33333	-1.5	5.94444	9.83333	2	3.5	6.72222	0.277778	24	10	20	3.96296	7.62963	0.259259	54	5.88889
bhgr	2008	121	86.4616	6.0452	0.9652	8.05556	26.6667	-1.66667	13.3889	34.4444	0.555556	-0.77	-0.71	-1.52	-1.37	2.6	1.4	0.7	-1.552	-0.858	-0.345	4.5974	0.127	0	0.9652	13.3889	34.4444	0.555556	-1.52	0.7	-0.345	0	1.83333	5.22222	-1.66667	5.11111	10.3889	-0.166667	4	7.38889	0.611111	24	21	17	3.64815	7.66667	-0.407407	62	2.44444
bhgr	2009	115	89.2556	3.2766	9.271	9.27778	26.6667	-2.22222	13.2222	30.5556	1.66667	-1.55	-1.59	-1.65	-0.88	1.9	0.4	0.8	-0.705	-0.106	0.326	12.8778	5.3086	3.7084	9.271	13.2222	30.5556	1.66667	-1.65	0.8	0.326	3.7084	2.38889	7.44444	-2.66667	3.55556	9.55556	-2.44444	1.55556	6.44444	-3.33333	24	24	26	2.5	7.81481	-2.81481	74	1.83333
bhgr	2010	109	130.785	11.1252	8.382	9.38889	22.2222	-1.66667	11.6667	24.4444	0	0.82	0.44	0.78	0.62	-1.5	-0.7	1.2	1.462	0.978	0.658	5.8166	7.5692	6.731	8.382	11.6667	24.4444	0	0.78	1.2	0.658	6.731	4.55556	10.2222	-1.16667	4.77778	11.6111	-2	-0.444444	5.55556	-6.44444	27	20	25	2.96296	9.12963	-3.2037	72	2.38889
bhgr	2011	122	93.98	10.3124	9.0678	8.22222	20	-1.66667	11.5556	23.8889	0	-0.83	-0.69	-0.42	-0.37	2.7	2.5	1.9	-1.554	-1.387	-0.199	8.6106	17.653	0.1524	9.0678	11.5556	23.8889	0	-0.42	1.9	-0.199	0.1524	4.66667	8.16667	1.11111	4.27778	9.16667	-0.666667	5.33333	8.66667	2.05556	14	18	8	4.75926	8.66667	0.833333	40	4.55556
bhgr	2012	117	149.301	11.4808	7.0866	10.8889	26.6667	0	12.6667	28.8889	0.555556	-0.85	-1.05	-0.27	-1.26	0.5	0.7	-0.3	-0.382	0.11	0.757	2.3368	10.3124	6.1468	7.0866	12.6667	28.8889	0.555556	-0.27	-0.3	0.757	6.1468	3.77778	8.16667	-0.555556	5.05556	10.2222	-0.111111	2.38889	6.77778	-1.94444	19	18	26	3.74074	8.38889	-0.87037	63	4.66667
bhgr	2013	116	64.3128	5.0546	6.2484	10.9444	25.5556	-1.11111	14.3889	29.4444	3.33333	-0.43	-0.63	-0.16	0.08	-0.2	1.5	0.2	-0.026	0.09	0.205	0.9144	3.5052	1.7526	6.2484	14.3889	29.4444	3.33333	-0.16	0.2	0.205	1.7526	1.11111	5	-2.83333	4.38889	9.44444	-0.722222	4.16667	7.94444	0.333333	26	20	16	3.22222	7.46296	-1.07407	62	3.77778
bhgr	2014	115	116.738	7.6708	6.6548	10.7222	24.4444	0.555556	14.6667	31.1111	1.11111	0.38	0.97	1.13	1.8	0.1	-0.9	0.8	0.018	0.295	1.001	10.5156	4.4958	4.6482	6.6548	14.6667	31.1111	1.11111	1.13	0.8	1.001	4.6482	2.83333	7.88889	-2.27778	3.38889	8.66667	-1.83333	0.0555556	5.05556	-5	25	21	27	2.09259	7.2037	-3.03704	73	1.11111
btyw	1985	97	68.961	2.667	2.3876	11.1667	25.5556	0	12.7778	28.8889	-2.22222	0.94	0.57	0.19	0	1.2	0.8	1.2	-0.696	-0.468	-0.706	3.8608	5.1054	0	2.667	11.1667	25.5556	0	0.57	0.8	-0.468	5.1054	1.22222	5.55556	-3.05556	3.5	8.22222	-1.22222	2	5.66667	-1.66667	30	22	25	2.24074	6.48148	-1.98148	77	4.66667
btyw	1986	100	111.125	4.6736	6.35	9.55556	26.1111	-1.11111	12.8333	31.6667	1.66667	1.61	2.18	1.55	1.16	-1	0.5	0.3	0.028	-0.107	0.353	21.844	8.128	2.3114	4.6736	9.55556	26.1111	-1.11111	2.18	0.5	-0.107	8.128	4.72222	8.33333	1.11111	5.72222	9.22222	2.27778	-0.222222	3.72222	-4.16667	16	10	27	3.40741	7.09259	-0.259259	53	1.22222
btyw	1987	104	95.7834	3.9624	3.556	11.5556	28.3333	-0.555556	14.5556	33.3333	1.11111	1.75	2.1	2.16	1.85	-1.3	-1.4	-1.3	1.716	1.855	2.107	8.2042	7.747	0.508	3.9624	11.5556	28.3333	-0.555556	2.1	-1.4	1.855	7.747	3	6.72222	-0.722222	5.66667	10	1.27778	2.66667	6	-0.722222	17	10	21	3.77778	7.57407	-0.0555556	48	4.72222
btyw	1988	100	95.3008	8.4582	9.7536	10.8333	25.5556	-0.555556	12.2222	30	1.66667	1.24	1.42	0.94	1.2	-0.4	0.6	0.1	0.495	0.389	0.193	2.5146	0.4318	4.0132	8.4582	10.8333	25.5556	-0.555556	1.42	0.6	0.389	0.4318	2.77778	5.83333	-0.222222	5.33333	10.0556	0.666667	2.72222	5.22222	0.166667	21	15	20	3.61111	7.03704	0.203704	56	3
btyw	1989	104	75.2856	3.6068	3.7084	12.6667	26.6667	1.11111	13	26.6667	1.66667	-1.02	-0.83	-0.32	0.47	1.2	1.1	1.6	-1.035	-0.76	-0.393	3.175	15.9766	0.7874	3.6068	12.6667	26.6667	1.11111	-0.83	1.1	-0.76	15.9766	3.94444	7.38889	0.555556	0.666667	5	-3.72222	3.38889	6.66667	0.111111	18	21	18	2.66667	6.35185	-1.01852	57	2.77778
btyw	1996	104	185.953	12.5222	10.1092	11.1667	26.1111	1.66667	11.8333	26.1111	-1.11111	0.75	1.01	1.46	2.18	0.3	1.1	0.8	-0.236	-0.391	-0.041	13.9446	4.3942	3.175	12.5222	11.1667	26.1111	1.66667	1.01	1.1	-0.391	4.3942	4.83333	7.72222	2	4.66667	8.72222	0.555556	4.83333	7.72222	1.94444	10	15	9	4.77778	8.05556	1.5	34	5.77778
btyw	1997	96	113.411	9.144	5.588	10.0556	23.3333	-0.555556	15.5556	31.6667	2.22222	0.28	0.65	1.05	1.83	1.7	-0.4	-0.6	-0.248	0.527	1.132	0.7112	0.8636	0.4572	9.144	10.0556	23.3333	-0.555556	0.65	-0.4	0.527	0.8636	3.88889	7.38889	0.333333	4.83333	9.61111	0.111111	4.5	7.83333	1.11111	16	15	13	4.40741	8.27778	0.518519	44	4.83333
btyw	1998	108	152.425	4.6482	14.732	9.83333	28.3333	-0.555556	12.4444	27.7778	2.22222	1.56	2.01	1.27	0.7	-2	-2.4	-1.4	2.751	2.658	2.206	25.273	6.2738	2.667	4.6482	9.83333	28.3333	-0.555556	2.01	-2.4	2.658	6.2738	5.61111	8.77778	2.44444	6.11111	10.0556	2.16667	3.27778	6.88889	-0.388889	7	7	22	5	8.57407	1.40741	36	3.88889
btyw	1999	106	126.492	2.7178	5.0546	9.5	27.2222	-1.11111	11.5556	30.5556	1.11111	-0.66	-0.33	-0.41	-0.68	1	1.3	1.4	-0.95	-0.88	-0.596	11.303	3.81	2.2606	2.7178	9.5	27.2222	-1.11111	-0.33	1.3	-0.88	3.81	5.05556	7.72222	2.38889	5.11111	8.38889	1.88889	3.55556	6.55556	0.5	8	8	14	4.57407	7.55556	1.59259	30	5.61111
btyw	2000	98	88.6968	4.1402	7.5946	10.8889	25	-2.22222	13.2778	26.6667	1.11111	-0.83	0.29	0.35	-0.05	1.7	1.3	1.2	-1.09	-0.397	0.251	21.5646	5.1562	3.5306	4.1402	10.8889	25	-2.22222	0.29	1.3	-0.397	5.1562	3.33333	6.33333	0.277778	5.55556	9.5	1.61111	4.83333	8.22222	1.44444	18	13	11	4.57407	8.01852	1.11111	42	5.05556
btyw	2001	105	85.217	5.9182	2.8194	8.66667	26.1111	-2.22222	13.6111	33.8889	0	0.29	0.45	-0.31	-0.3	1.7	0.9	0.2	-0.548	-0.05	0.282	11.6078	5.1816	3.81	5.9182	8.66667	26.1111	-2.22222	0.45	0.9	-0.05	5.1816	4.05556	7.83333	0.222222	4.83333	9.88889	-0.222222	3.88889	7.16667	0.666667	17	17	16	4.25926	8.2963	0.222222	50	3.33333
btyw	2002	103	110.414	4.699	4.445	10.3333	23.3333	-0.555556	12	27.7778	-0.555556	-0.64	-0.43	-0.32	-0.63	1.1	-0.2	-0.1	-0.118	0.401	0.886	2.8702	7.2898	0.3048	4.699	10.3333	23.3333	-0.555556	-0.43	-0.2	0.401	7.2898	4.66667	7.33333	2	5.77778	10.6111	0.944444	4.55556	7.22222	1.88889	12	17	4	5	8.38889	1.61111	33	4.05556
btyw	2003	101	119.05	16.4592	3.3782	9.66667	20.5556	1.11111	13	28.8889	0	1.75	1.51	1.18	0.89	-0.7	-0.3	-0.1	0.83	0.413	0.214	3.2766	4.7498	6.4262	16.4592	9.66667	20.5556	1.11111	1.51	-0.3	0.413	4.7498	6.72222	10.2222	3.16667	5.88889	10.8889	0.888889	5.33333	8.22222	2.44444	12	16	6	5.98148	9.77778	2.16667	34	4.66667
btyw	2004	98	104.14	7.62	3.302	10.1667	25.2657	-0.676328	13.9444	28.8889	2.22222	0.48	0.61	0.57	0.88	1.2	0.4	-0.9	-0.306	0.358	0.558	12.7254	1.2192	0.2286	7.62	10.1667	25.2657	-0.676328	0.61	0.4	0.358	1.2192	3.88889	6.72222	1.11111	5.88889	9.83333	2	5.05556	7.77778	2.27778	13	7	8	4.94444	8.11111	1.7963	28	6.72222
btyw	2005	99	99.3648	6.6802	10.7696	10.0556	25	-0.555556	14.2222	32.2222	3.33333	0.81	1.36	1.03	1.86	-3.1	0.3	-0.6	1.057	0.626	0.885	5.9182	8.382	2.1336	6.6802	10.0556	25	-0.555556	1.36	0.3	0.626	8.382	5	8.55556	1.44444	5.22222	10.5556	-0.0555556	5.44444	8.44444	2.5	13	17	5	5.22222	9.18519	1.2963	35	3.88889
btyw	2006	109	135.636	6.35	6.223	10.6667	26.6667	-0.555556	14	33.8889	1.11111	0.66	0.05	0.4	0.48	0.1	1.8	1.1	-0.521	-0.571	0.045	5.3086	13.4366	8.3058	6.35	10.6667	26.6667	-0.555556	0.05	1.8	-0.571	13.4366	5.88889	8.94444	2.83333	4.61111	9.83333	-0.666667	3.22222	6.27778	0.166667	5	18	18	4.57407	8.35185	0.777778	41	5
btyw	2007	97	95.6056	5.08	4.0894	9.72222	25	-1.11111	12.8889	30	1.11111	0.04	-0.36	0.16	-0.1	-0.1	0.2	-0.1	0.125	0.026	0.348	11.2776	0.889	3.4036	5.08	9.72222	25	-1.11111	-0.36	0.2	0.026	0.889	2.44444	6.33333	-1.5	5.94444	9.83333	2	3.5	6.72222	0.277778	24	10	20	3.96296	7.62963	0.259259	54	5.88889
btyw	2008	102	86.4616	6.0452	0.9652	8.05556	26.6667	-1.66667	13.3889	34.4444	0.555556	-0.77	-0.71	-1.52	-1.37	2.6	1.4	0.7	-1.552	-0.858	-0.345	4.5974	0.127	0	6.0452	8.05556	26.6667	-1.66667	-0.71	1.4	-0.858	0.127	1.83333	5.22222	-1.66667	5.11111	10.3889	-0.166667	4	7.38889	0.611111	24	21	17	3.64815	7.66667	-0.407407	62	2.44444
btyw	2009	108	89.2556	3.2766	9.271	9.27778	26.6667	-2.22222	13.2222	30.5556	1.66667	-1.55	-1.59	-1.65	-0.88	1.9	0.4	0.8	-0.705	-0.106	0.326	12.8778	5.3086	3.7084	3.2766	9.27778	26.6667	-2.22222	-1.59	0.4	-0.106	5.3086	2.38889	7.44444	-2.66667	3.55556	9.55556	-2.44444	1.55556	6.44444	-3.33333	24	24	26	2.5	7.81481	-2.81481	74	1.83333
btyw	2010	102	130.785	11.1252	8.382	9.38889	22.2222	-1.66667	11.6667	24.4444	0	0.82	0.44	0.78	0.62	-1.5	-0.7	1.2	1.462	0.978	0.658	5.8166	7.5692	6.731	11.1252	9.38889	22.2222	-1.66667	0.44	-0.7	0.978	7.5692	4.55556	10.2222	-1.16667	4.77778	11.6111	-2	-0.444444	5.55556	-6.44444	27	20	25	2.96296	9.12963	-3.2037	72	2.38889
btyw	2011	121	93.98	10.3124	9.0678	8.22222	20	-1.66667	11.5556	23.8889	0	-0.83	-0.69	-0.42	-0.37	2.7	2.5	1.9	-1.554	-1.387	-0.199	8.6106	17.653	0.1524	10.3124	8.22222	20	-1.66667	-0.69	2.5	-1.387	17.653	4.66667	8.16667	1.11111	4.27778	9.16667	-0.666667	5.33333	8.66667	2.05556	14	18	8	4.75926	8.66667	0.833333	40	4.55556
btyw	2012	112	149.301	11.4808	7.0866	10.8889	26.6667	0	12.6667	28.8889	0.555556	-0.85	-1.05	-0.27	-1.26	0.5	0.7	-0.3	-0.382	0.11	0.757	2.3368	10.3124	6.1468	11.4808	10.8889	26.6667	0	-1.05	0.7	0.11	10.3124	3.77778	8.16667	-0.555556	5.05556	10.2222	-0.111111	2.38889	6.77778	-1.94444	19	18	26	3.74074	8.38889	-0.87037	63	4.66667
btyw	2013	109	64.3128	5.0546	6.2484	10.9444	25.5556	-1.11111	14.3889	29.4444	3.33333	-0.43	-0.63	-0.16	0.08	-0.2	1.5	0.2	-0.026	0.09	0.205	0.9144	3.5052	1.7526	5.0546	10.9444	25.5556	-1.11111	-0.63	1.5	0.09	3.5052	1.11111	5	-2.83333	4.38889	9.44444	-0.722222	4.16667	7.94444	0.333333	26	20	16	3.22222	7.46296	-1.07407	62	3.77778
btyw	2014	101	116.738	7.6708	6.6548	10.7222	24.4444	0.555556	14.6667	31.1111	1.11111	0.38	0.97	1.13	1.8	0.1	-0.9	0.8	0.018	0.295	1.001	10.5156	4.4958	4.6482	7.6708	10.7222	24.4444	0.555556	0.97	-0.9	0.295	4.4958	2.83333	7.88889	-2.27778	3.38889	8.66667	-1.83333	0.0555556	5.05556	-5	25	21	27	2.09259	7.2037	-3.03704	73	1.11111
cedw	1985	136	68.961	2.667	2.3876	11.1667	25.5556	0	12.7778	28.8889	-2.22222	0.94	0.57	0.19	0	1.2	0.8	1.2	-0.696	-0.468	-0.706	3.8608	5.1054	0	2.3876	12.7778	28.8889	-2.22222	0.19	1.2	-0.706	0	1.22222	5.55556	-3.05556	3.5	8.22222	-1.22222	2	5.66667	-1.66667	30	22	25	2.24074	6.48148	-1.98148	77	4.66667
cedw	1986	147	111.125	4.6736	6.35	9.55556	26.1111	-1.11111	12.8333	31.6667	1.66667	1.61	2.18	1.55	1.16	-1	0.5	0.3	0.028	-0.107	0.353	21.844	8.128	2.3114	6.35	12.8333	31.6667	1.66667	1.55	0.3	0.353	2.3114	4.72222	8.33333	1.11111	5.72222	9.22222	2.27778	-0.222222	3.72222	-4.16667	16	10	27	3.40741	7.09259	-0.259259	53	1.22222
cedw	1987	139	95.7834	3.9624	3.556	11.5556	28.3333	-0.555556	14.5556	33.3333	1.11111	1.75	2.1	2.16	1.85	-1.3	-1.4	-1.3	1.716	1.855	2.107	8.2042	7.747	0.508	3.556	14.5556	33.3333	1.11111	2.16	-1.3	2.107	0.508	3	6.72222	-0.722222	5.66667	10	1.27778	2.66667	6	-0.722222	17	10	21	3.77778	7.57407	-0.0555556	48	4.72222
cedw	1988	136	95.3008	8.4582	9.7536	10.8333	25.5556	-0.555556	12.2222	30	1.66667	1.24	1.42	0.94	1.2	-0.4	0.6	0.1	0.495	0.389	0.193	2.5146	0.4318	4.0132	9.7536	12.2222	30	1.66667	0.94	0.1	0.193	4.0132	2.77778	5.83333	-0.222222	5.33333	10.0556	0.666667	2.72222	5.22222	0.166667	21	15	20	3.61111	7.03704	0.203704	56	3
cedw	1989	148	75.2856	3.6068	3.7084	12.6667	26.6667	1.11111	13	26.6667	1.66667	-1.02	-0.83	-0.32	0.47	1.2	1.1	1.6	-1.035	-0.76	-0.393	3.175	15.9766	0.7874	3.7084	13	26.6667	1.66667	-0.32	1.6	-0.393	0.7874	3.94444	7.38889	0.555556	0.666667	5	-3.72222	3.38889	6.66667	0.111111	18	21	18	2.66667	6.35185	-1.01852	57	2.77778
cedw	1996	139	185.953	12.5222	10.1092	11.1667	26.1111	1.66667	11.8333	26.1111	-1.11111	0.75	1.01	1.46	2.18	0.3	1.1	0.8	-0.236	-0.391	-0.041	13.9446	4.3942	3.175	10.1092	11.8333	26.1111	-1.11111	1.46	0.8	-0.041	3.175	4.83333	7.72222	2	4.66667	8.72222	0.555556	4.83333	7.72222	1.94444	10	15	9	4.77778	8.05556	1.5	34	5.77778
cedw	1997	130	113.411	9.144	5.588	10.0556	23.3333	-0.555556	15.5556	31.6667	2.22222	0.28	0.65	1.05	1.83	1.7	-0.4	-0.6	-0.248	0.527	1.132	0.7112	0.8636	0.4572	5.588	15.5556	31.6667	2.22222	1.05	-0.6	1.132	0.4572	3.88889	7.38889	0.333333	4.83333	9.61111	0.111111	4.5	7.83333	1.11111	16	15	13	4.40741	8.27778	0.518519	44	4.83333
cedw	1998	146	152.425	4.6482	14.732	9.83333	28.3333	-0.555556	12.4444	27.7778	2.22222	1.56	2.01	1.27	0.7	-2	-2.4	-1.4	2.751	2.658	2.206	25.273	6.2738	2.667	14.732	12.4444	27.7778	2.22222	1.27	-1.4	2.206	2.667	5.61111	8.77778	2.44444	6.11111	10.0556	2.16667	3.27778	6.88889	-0.388889	7	7	22	5	8.57407	1.40741	36	3.88889
cedw	1999	143	126.492	2.7178	5.0546	9.5	27.2222	-1.11111	11.5556	30.5556	1.11111	-0.66	-0.33	-0.41	-0.68	1	1.3	1.4	-0.95	-0.88	-0.596	11.303	3.81	2.2606	5.0546	11.5556	30.5556	1.11111	-0.41	1.4	-0.596	2.2606	5.05556	7.72222	2.38889	5.11111	8.38889	1.88889	3.55556	6.55556	0.5	8	8	14	4.57407	7.55556	1.59259	30	5.61111
cedw	2000	135	88.6968	4.1402	7.5946	10.8889	25	-2.22222	13.2778	26.6667	1.11111	-0.83	0.29	0.35	-0.05	1.7	1.3	1.2	-1.09	-0.397	0.251	21.5646	5.1562	3.5306	7.5946	13.2778	26.6667	1.11111	0.35	1.2	0.251	3.5306	3.33333	6.33333	0.277778	5.55556	9.5	1.61111	4.83333	8.22222	1.44444	18	13	11	4.57407	8.01852	1.11111	42	5.05556
cedw	2001	161	85.217	5.9182	2.8194	8.66667	26.1111	-2.22222	13.6111	33.8889	0	0.29	0.45	-0.31	-0.3	1.7	0.9	0.2	-0.548	-0.05	0.282	11.6078	5.1816	3.81	2.8194	13.6111	33.8889	0	-0.31	0.2	0.282	3.81	4.05556	7.83333	0.222222	4.83333	9.88889	-0.222222	3.88889	7.16667	0.666667	17	17	16	4.25926	8.2963	0.222222	50	3.33333
cedw	2002	143	110.414	4.699	4.445	10.3333	23.3333	-0.555556	12	27.7778	-0.555556	-0.64	-0.43	-0.32	-0.63	1.1	-0.2	-0.1	-0.118	0.401	0.886	2.8702	7.2898	0.3048	4.445	12	27.7778	-0.555556	-0.32	-0.1	0.886	0.3048	4.66667	7.33333	2	5.77778	10.6111	0.944444	4.55556	7.22222	1.88889	12	17	4	5	8.38889	1.61111	33	4.05556
cedw	2003	144	119.05	16.4592	3.3782	9.66667	20.5556	1.11111	13	28.8889	0	1.75	1.51	1.18	0.89	-0.7	-0.3	-0.1	0.83	0.413	0.214	3.2766	4.7498	6.4262	3.3782	13	28.8889	0	1.18	-0.1	0.214	6.4262	6.72222	10.2222	3.16667	5.88889	10.8889	0.888889	5.33333	8.22222	2.44444	12	16	6	5.98148	9.77778	2.16667	34	4.66667
cedw	2004	147	104.14	7.62	3.302	10.1667	25.2657	-0.676328	13.9444	28.8889	2.22222	0.48	0.61	0.57	0.88	1.2	0.4	-0.9	-0.306	0.358	0.558	12.7254	1.2192	0.2286	3.302	13.9444	28.8889	2.22222	0.57	-0.9	0.558	0.2286	3.88889	6.72222	1.11111	5.88889	9.83333	2	5.05556	7.77778	2.27778	13	7	8	4.94444	8.11111	1.7963	28	6.72222
cedw	2005	143	99.3648	6.6802	10.7696	10.0556	25	-0.555556	14.2222	32.2222	3.33333	0.81	1.36	1.03	1.86	-3.1	0.3	-0.6	1.057	0.626	0.885	5.9182	8.382	2.1336	10.7696	14.2222	32.2222	3.33333	1.03	-0.6	0.885	2.1336	5	8.55556	1.44444	5.22222	10.5556	-0.0555556	5.44444	8.44444	2.5	13	17	5	5.22222	9.18519	1.2963	35	3.88889
cedw	2006	141	135.636	6.35	6.223	10.6667	26.6667	-0.555556	14	33.8889	1.11111	0.66	0.05	0.4	0.48	0.1	1.8	1.1	-0.521	-0.571	0.045	5.3086	13.4366	8.3058	6.223	14	33.8889	1.11111	0.4	1.1	0.045	8.3058	5.88889	8.94444	2.83333	4.61111	9.83333	-0.666667	3.22222	6.27778	0.166667	5	18	18	4.57407	8.35185	0.777778	41	5
cedw	2007	135	95.6056	5.08	4.0894	9.72222	25	-1.11111	12.8889	30	1.11111	0.04	-0.36	0.16	-0.1	-0.1	0.2	-0.1	0.125	0.026	0.348	11.2776	0.889	3.4036	4.0894	12.8889	30	1.11111	0.16	-0.1	0.348	3.4036	2.44444	6.33333	-1.5	5.94444	9.83333	2	3.5	6.72222	0.277778	24	10	20	3.96296	7.62963	0.259259	54	5.88889
cedw	2008	135	86.4616	6.0452	0.9652	8.05556	26.6667	-1.66667	13.3889	34.4444	0.555556	-0.77	-0.71	-1.52	-1.37	2.6	1.4	0.7	-1.552	-0.858	-0.345	4.5974	0.127	0	0.9652	13.3889	34.4444	0.555556	-1.52	0.7	-0.345	0	1.83333	5.22222	-1.66667	5.11111	10.3889	-0.166667	4	7.38889	0.611111	24	21	17	3.64815	7.66667	-0.407407	62	2.44444
cedw	2009	137	89.2556	3.2766	9.271	9.27778	26.6667	-2.22222	13.2222	30.5556	1.66667	-1.55	-1.59	-1.65	-0.88	1.9	0.4	0.8	-0.705	-0.106	0.326	12.8778	5.3086	3.7084	9.271	13.2222	30.5556	1.66667	-1.65	0.8	0.326	3.7084	2.38889	7.44444	-2.66667	3.55556	9.55556	-2.44444	1.55556	6.44444	-3.33333	24	24	26	2.5	7.81481	-2.81481	74	1.83333
cedw	2010	151	130.785	11.1252	8.382	9.38889	22.2222	-1.66667	11.6667	24.4444	0	0.82	0.44	0.78	0.62	-1.5	-0.7	1.2	1.462	0.978	0.658	5.8166	7.5692	6.731	8.382	11.6667	24.4444	0	0.78	1.2	0.658	6.731	4.55556	10.2222	-1.16667	4.77778	11.6111	-2	-0.444444	5.55556	-6.44444	27	20	25	2.96296	9.12963	-3.2037	72	2.38889
cedw	2011	140	93.98	10.3124	9.0678	8.22222	20	-1.66667	11.5556	23.8889	0	-0.83	-0.69	-0.42	-0.37	2.7	2.5	1.9	-1.554	-1.387	-0.199	8.6106	17.653	0.1524	9.0678	11.5556	23.8889	0	-0.42	1.9	-0.199	0.1524	4.66667	8.16667	1.11111	4.27778	9.16667	-0.666667	5.33333	8.66667	2.05556	14	18	8	4.75926	8.66667	0.833333	40	4.55556
cedw	2012	148	149.301	11.4808	7.0866	10.8889	26.6667	0	12.6667	28.8889	0.555556	-0.85	-1.05	-0.27	-1.26	0.5	0.7	-0.3	-0.382	0.11	0.757	2.3368	10.3124	6.1468	7.0866	12.6667	28.8889	0.555556	-0.27	-0.3	0.757	6.1468	3.77778	8.16667	-0.555556	5.05556	10.2222	-0.111111	2.38889	6.77778	-1.94444	19	18	26	3.74074	8.38889	-0.87037	63	4.66667
cedw	2013	139	64.3128	5.0546	6.2484	10.9444	25.5556	-1.11111	14.3889	29.4444	3.33333	-0.43	-0.63	-0.16	0.08	-0.2	1.5	0.2	-0.026	0.09	0.205	0.9144	3.5052	1.7526	6.2484	14.3889	29.4444	3.33333	-0.16	0.2	0.205	1.7526	1.11111	5	-2.83333	4.38889	9.44444	-0.722222	4.16667	7.94444	0.333333	26	20	16	3.22222	7.46296	-1.07407	62	3.77778
cedw	2014	134	116.738	7.6708	6.6548	10.7222	24.4444	0.555556	14.6667	31.1111	1.11111	0.38	0.97	1.13	1.8	0.1	-0.9	0.8	0.018	0.295	1.001	10.5156	4.4958	4.6482	6.6548	14.6667	31.1111	1.11111	1.13	0.8	1.001	4.6482	2.83333	7.88889	-2.27778	3.38889	8.66667	-1.83333	0.0555556	5.05556	-5	25	21	27	2.09259	7.2037	-3.03704	73	1.11111
hafl	1985	119	68.961	2.667	2.3876	11.1667	25.5556	0	12.7778	28.8889	-2.22222	0.94	0.57	0.19	0	1.2	0.8	1.2	-0.696	-0.468	-0.706	3.8608	5.1054	0	2.3876	12.7778	28.8889	-2.22222	0.38	1	-0.587	2.5527	1.22222	5.55556	-3.05556	3.5	8.22222	-1.22222	2	5.66667	-1.66667	30	22	25	2.24074	6.48148	-1.98148	77	4.66667
hafl	1986	126	111.125	4.6736	6.35	9.55556	26.1111	-1.11111	12.8333	31.6667	1.66667	1.61	2.18	1.55	1.16	-1	0.5	0.3	0.028	-0.107	0.353	21.844	8.128	2.3114	6.35	12.8333	31.6667	1.66667	1.865	0.4	0.123	5.2197	4.72222	8.33333	1.11111	5.72222	9.22222	2.27778	-0.222222	3.72222	-4.16667	16	10	27	3.40741	7.09259	-0.259259	53	1.22222
hafl	1987	115	95.7834	3.9624	3.556	11.5556	28.3333	-0.555556	14.5556	33.3333	1.11111	1.75	2.1	2.16	1.85	-1.3	-1.4	-1.3	1.716	1.855	2.107	8.2042	7.747	0.508	3.556	14.5556	33.3333	1.11111	2.13	-1.35	1.981	4.1275	3	6.72222	-0.722222	5.66667	10	1.27778	2.66667	6	-0.722222	17	10	21	3.77778	7.57407	-0.0555556	48	4.72222
hafl	1988	107	95.3008	8.4582	9.7536	10.8333	25.5556	-0.555556	12.2222	30	1.66667	1.24	1.42	0.94	1.2	-0.4	0.6	0.1	0.495	0.389	0.193	2.5146	0.4318	4.0132	9.7536	12.2222	30	1.66667	1.18	0.35	0.291	2.2225	2.77778	5.83333	-0.222222	5.33333	10.0556	0.666667	2.72222	5.22222	0.166667	21	15	20	3.61111	7.03704	0.203704	56	3
hafl	1989	136	75.2856	3.6068	3.7084	12.6667	26.6667	1.11111	13	26.6667	1.66667	-1.02	-0.83	-0.32	0.47	1.2	1.1	1.6	-1.035	-0.76	-0.393	3.175	15.9766	0.7874	3.7084	13	26.6667	1.66667	-0.575	1.35	-0.5765	8.382	3.94444	7.38889	0.555556	0.666667	5	-3.72222	3.38889	6.66667	0.111111	18	21	18	2.66667	6.35185	-1.01852	57	2.77778
hafl	1997	131	113.411	9.144	5.588	10.0556	23.3333	-0.555556	15.5556	31.6667	2.22222	0.28	0.65	1.05	1.83	1.7	-0.4	-0.6	-0.248	0.527	1.132	0.7112	0.8636	0.4572	5.588	15.5556	31.6667	2.22222	0.85	-0.5	0.8295	0.6604	3.88889	7.38889	0.333333	4.83333	9.61111	0.111111	4.5	7.83333	1.11111	16	15	13	4.40741	8.27778	0.518519	44	4.83333
hafl	1998	127	152.425	4.6482	14.732	9.83333	28.3333	-0.555556	12.4444	27.7778	2.22222	1.56	2.01	1.27	0.7	-2	-2.4	-1.4	2.751	2.658	2.206	25.273	6.2738	2.667	14.732	12.4444	27.7778	2.22222	1.64	-1.9	2.432	4.4704	5.61111	8.77778	2.44444	6.11111	10.0556	2.16667	3.27778	6.88889	-0.388889	7	7	22	5	8.57407	1.40741	36	3.88889
hafl	1999	140	126.492	2.7178	5.0546	9.5	27.2222	-1.11111	11.5556	30.5556	1.11111	-0.66	-0.33	-0.41	-0.68	1	1.3	1.4	-0.95	-0.88	-0.596	11.303	3.81	2.2606	5.0546	11.5556	30.5556	1.11111	-0.37	1.35	-0.738	3.0353	5.05556	7.72222	2.38889	5.11111	8.38889	1.88889	3.55556	6.55556	0.5	8	8	14	4.57407	7.55556	1.59259	30	5.61111
hafl	2000	126	88.6968	4.1402	7.5946	10.8889	25	-2.22222	13.2778	26.6667	1.11111	-0.83	0.29	0.35	-0.05	1.7	1.3	1.2	-1.09	-0.397	0.251	21.5646	5.1562	3.5306	7.5946	13.2778	26.6667	1.11111	0.32	1.25	-0.073	4.3434	3.33333	6.33333	0.277778	5.55556	9.5	1.61111	4.83333	8.22222	1.44444	18	13	11	4.57407	8.01852	1.11111	42	5.05556
hafl	2001	126	85.217	5.9182	2.8194	8.66667	26.1111	-2.22222	13.6111	33.8889	0	0.29	0.45	-0.31	-0.3	1.7	0.9	0.2	-0.548	-0.05	0.282	11.6078	5.1816	3.81	2.8194	13.6111	33.8889	0	0.07	0.55	0.116	4.4958	4.05556	7.83333	0.222222	4.83333	9.88889	-0.222222	3.88889	7.16667	0.666667	17	17	16	4.25926	8.2963	0.222222	50	3.33333
hafl	2002	131	110.414	4.699	4.445	10.3333	23.3333	-0.555556	12	27.7778	-0.555556	-0.64	-0.43	-0.32	-0.63	1.1	-0.2	-0.1	-0.118	0.401	0.886	2.8702	7.2898	0.3048	4.445	12	27.7778	-0.555556	-0.375	-0.15	0.6435	3.7973	4.66667	7.33333	2	5.77778	10.6111	0.944444	4.55556	7.22222	1.88889	12	17	4	5	8.38889	1.61111	33	4.05556
hafl	2003	132	119.05	16.4592	3.3782	9.66667	20.5556	1.11111	13	28.8889	0	1.75	1.51	1.18	0.89	-0.7	-0.3	-0.1	0.83	0.413	0.214	3.2766	4.7498	6.4262	3.3782	13	28.8889	0	1.345	-0.2	0.3135	5.588	6.72222	10.2222	3.16667	5.88889	10.8889	0.888889	5.33333	8.22222	2.44444	12	16	6	5.98148	9.77778	2.16667	34	4.66667
hafl	2004	122	104.14	7.62	3.302	10.1667	25.2657	-0.676328	13.9444	28.8889	2.22222	0.48	0.61	0.57	0.88	1.2	0.4	-0.9	-0.306	0.358	0.558	12.7254	1.2192	0.2286	3.302	13.9444	28.8889	2.22222	0.59	-0.25	0.458	0.7239	3.88889	6.72222	1.11111	5.88889	9.83333	2	5.05556	7.77778	2.27778	13	7	8	4.94444	8.11111	1.7963	28	6.72222
hafl	2005	126	99.3648	6.6802	10.7696	10.0556	25	-0.555556	14.2222	32.2222	3.33333	0.81	1.36	1.03	1.86	-3.1	0.3	-0.6	1.057	0.626	0.885	5.9182	8.382	2.1336	10.7696	14.2222	32.2222	3.33333	1.195	-0.15	0.7555	5.2578	5	8.55556	1.44444	5.22222	10.5556	-0.0555556	5.44444	8.44444	2.5	13	17	5	5.22222	9.18519	1.2963	35	3.88889
hafl	2006	113	135.636	6.35	6.223	10.6667	26.6667	-0.555556	14	33.8889	1.11111	0.66	0.05	0.4	0.48	0.1	1.8	1.1	-0.521	-0.571	0.045	5.3086	13.4366	8.3058	6.223	14	33.8889	1.11111	0.225	1.45	-0.263	10.8712	5.88889	8.94444	2.83333	4.61111	9.83333	-0.666667	3.22222	6.27778	0.166667	5	18	18	4.57407	8.35185	0.777778	41	5
hafl	2007	126	95.6056	5.08	4.0894	9.72222	25	-1.11111	12.8889	30	1.11111	0.04	-0.36	0.16	-0.1	-0.1	0.2	-0.1	0.125	0.026	0.348	11.2776	0.889	3.4036	4.0894	12.8889	30	1.11111	-0.1	0.05	0.187	2.1463	2.44444	6.33333	-1.5	5.94444	9.83333	2	3.5	6.72222	0.277778	24	10	20	3.96296	7.62963	0.259259	54	5.88889
hafl	2008	123	86.4616	6.0452	0.9652	8.05556	26.6667	-1.66667	13.3889	34.4444	0.555556	-0.77	-0.71	-1.52	-1.37	2.6	1.4	0.7	-1.552	-0.858	-0.345	4.5974	0.127	0	0.9652	13.3889	34.4444	0.555556	-1.115	1.05	-0.6015	0.0635	1.83333	5.22222	-1.66667	5.11111	10.3889	-0.166667	4	7.38889	0.611111	24	21	17	3.64815	7.66667	-0.407407	62	2.44444
hafl	2009	136	89.2556	3.2766	9.271	9.27778	26.6667	-2.22222	13.2222	30.5556	1.66667	-1.55	-1.59	-1.65	-0.88	1.9	0.4	0.8	-0.705	-0.106	0.326	12.8778	5.3086	3.7084	9.271	13.2222	30.5556	1.66667	-1.62	0.6	0.11	4.5085	2.38889	7.44444	-2.66667	3.55556	9.55556	-2.44444	1.55556	6.44444	-3.33333	24	24	26	2.5	7.81481	-2.81481	74	1.83333
hafl	2010	129	130.785	11.1252	8.382	9.38889	22.2222	-1.66667	11.6667	24.4444	0	0.82	0.44	0.78	0.62	-1.5	-0.7	1.2	1.462	0.978	0.658	5.8166	7.5692	6.731	8.382	11.6667	24.4444	0	0.61	0.25	0.818	7.1501	4.55556	10.2222	-1.16667	4.77778	11.6111	-2	-0.444444	5.55556	-6.44444	27	20	25	2.96296	9.12963	-3.2037	72	2.38889
hafl	2011	133	93.98	10.3124	9.0678	8.22222	20	-1.66667	11.5556	23.8889	0	-0.83	-0.69	-0.42	-0.37	2.7	2.5	1.9	-1.554	-1.387	-0.199	8.6106	17.653	0.1524	9.0678	11.5556	23.8889	0	-0.555	2.2	-0.793	8.9027	4.66667	8.16667	1.11111	4.27778	9.16667	-0.666667	5.33333	8.66667	2.05556	14	18	8	4.75926	8.66667	0.833333	40	4.55556
hafl	2012	131	149.301	11.4808	7.0866	10.8889	26.6667	0	12.6667	28.8889	0.555556	-0.85	-1.05	-0.27	-1.26	0.5	0.7	-0.3	-0.382	0.11	0.757	2.3368	10.3124	6.1468	7.0866	12.6667	28.8889	0.555556	-0.66	0.2	0.4335	8.2296	3.77778	8.16667	-0.555556	5.05556	10.2222	-0.111111	2.38889	6.77778	-1.94444	19	18	26	3.74074	8.38889	-0.87037	63	4.66667
hafl	2013	115	64.3128	5.0546	6.2484	10.9444	25.5556	-1.11111	14.3889	29.4444	3.33333	-0.43	-0.63	-0.16	0.08	-0.2	1.5	0.2	-0.026	0.09	0.205	0.9144	3.5052	1.7526	6.2484	14.3889	29.4444	3.33333	-0.395	0.85	0.1475	2.6289	1.11111	5	-2.83333	4.38889	9.44444	-0.722222	4.16667	7.94444	0.333333	26	20	16	3.22222	7.46296	-1.07407	62	3.77778
hafl	2014	127	116.738	7.6708	6.6548	10.7222	24.4444	0.555556	14.6667	31.1111	1.11111	0.38	0.97	1.13	1.8	0.1	-0.9	0.8	0.018	0.295	1.001	10.5156	4.4958	4.6482	6.6548	14.6667	31.1111	1.11111	1.05	-0.05	0.648	4.572	2.83333	7.88889	-2.27778	3.38889	8.66667	-1.83333	0.0555556	5.05556	-5	25	21	27	2.09259	7.2037	-3.03704	73	1.11111
hewa	1985	119	68.961	2.667	2.3876	11.1667	25.5556	0	12.7778	28.8889	-2.22222	0.94	0.57	0.19	0	1.2	0.8	1.2	-0.696	-0.468	-0.706	3.8608	5.1054	0	2.3876	12.7778	28.8889	-2.22222	0.19	1.2	-0.706	0	1.22222	5.55556	-3.05556	3.5	8.22222	-1.22222	2	5.66667	-1.66667	30	22	25	2.24074	6.48148	-1.98148	77	4.66667
hewa	1986	119	111.125	4.6736	6.35	9.55556	26.1111	-1.11111	12.8333	31.6667	1.66667	1.61	2.18	1.55	1.16	-1	0.5	0.3	0.028	-0.107	0.353	21.844	8.128	2.3114	6.35	12.8333	31.6667	1.66667	1.55	0.3	0.353	2.3114	4.72222	8.33333	1.11111	5.72222	9.22222	2.27778	-0.222222	3.72222	-4.16667	16	10	27	3.40741	7.09259	-0.259259	53	1.22222
hewa	1987	114	95.7834	3.9624	3.556	11.5556	28.3333	-0.555556	14.5556	33.3333	1.11111	1.75	2.1	2.16	1.85	-1.3	-1.4	-1.3	1.716	1.855	2.107	8.2042	7.747	0.508	3.556	14.5556	33.3333	1.11111	2.16	-1.3	2.107	0.508	3	6.72222	-0.722222	5.66667	10	1.27778	2.66667	6	-0.722222	17	10	21	3.77778	7.57407	-0.0555556	48	4.72222
hewa	1988	113	95.3008	8.4582	9.7536	10.8333	25.5556	-0.555556	12.2222	30	1.66667	1.24	1.42	0.94	1.2	-0.4	0.6	0.1	0.495	0.389	0.193	2.5146	0.4318	4.0132	9.7536	12.2222	30	1.66667	0.94	0.1	0.193	4.0132	2.77778	5.83333	-0.222222	5.33333	10.0556	0.666667	2.72222	5.22222	0.166667	21	15	20	3.61111	7.03704	0.203704	56	3
hewa	1989	121	75.2856	3.6068	3.7084	12.6667	26.6667	1.11111	13	26.6667	1.66667	-1.02	-0.83	-0.32	0.47	1.2	1.1	1.6	-1.035	-0.76	-0.393	3.175	15.9766	0.7874	3.7084	13	26.6667	1.66667	-0.32	1.6	-0.393	0.7874	3.94444	7.38889	0.555556	0.666667	5	-3.72222	3.38889	6.66667	0.111111	18	21	18	2.66667	6.35185	-1.01852	57	2.77778
hewa	1996	116	185.953	12.5222	10.1092	11.1667	26.1111	1.66667	11.8333	26.1111	-1.11111	0.75	1.01	1.46	2.18	0.3	1.1	0.8	-0.236	-0.391	-0.041	13.9446	4.3942	3.175	10.1092	11.8333	26.1111	-1.11111	1.46	0.8	-0.041	3.175	4.83333	7.72222	2	4.66667	8.72222	0.555556	4.83333	7.72222	1.94444	10	15	9	4.77778	8.05556	1.5	34	5.77778
hewa	1997	118	113.411	9.144	5.588	10.0556	23.3333	-0.555556	15.5556	31.6667	2.22222	0.28	0.65	1.05	1.83	1.7	-0.4	-0.6	-0.248	0.527	1.132	0.7112	0.8636	0.4572	5.588	15.5556	31.6667	2.22222	1.05	-0.6	1.132	0.4572	3.88889	7.38889	0.333333	4.83333	9.61111	0.111111	4.5	7.83333	1.11111	16	15	13	4.40741	8.27778	0.518519	44	4.83333
hewa	1998	109	152.425	4.6482	14.732	9.83333	28.3333	-0.555556	12.4444	27.7778	2.22222	1.56	2.01	1.27	0.7	-2	-2.4	-1.4	2.751	2.658	2.206	25.273	6.2738	2.667	14.732	12.4444	27.7778	2.22222	1.27	-1.4	2.206	2.667	5.61111	8.77778	2.44444	6.11111	10.0556	2.16667	3.27778	6.88889	-0.388889	7	7	22	5	8.57407	1.40741	36	3.88889
hewa	1999	109	126.492	2.7178	5.0546	9.5	27.2222	-1.11111	11.5556	30.5556	1.11111	-0.66	-0.33	-0.41	-0.68	1	1.3	1.4	-0.95	-0.88	-0.596	11.303	3.81	2.2606	5.0546	11.5556	30.5556	1.11111	-0.41	1.4	-0.596	2.2606	5.05556	7.72222	2.38889	5.11111	8.38889	1.88889	3.55556	6.55556	0.5	8	8	14	4.57407	7.55556	1.59259	30	5.61111
hewa	2000	113	88.6968	4.1402	7.5946	10.8889	25	-2.22222	13.2778	26.6667	1.11111	-0.83	0.29	0.35	-0.05	1.7	1.3	1.2	-1.09	-0.397	0.251	21.5646	5.1562	3.5306	7.5946	13.2778	26.6667	1.11111	0.35	1.2	0.251	3.5306	3.33333	6.33333	0.277778	5.55556	9.5	1.61111	4.83333	8.22222	1.44444	18	13	11	4.57407	8.01852	1.11111	42	5.05556
hewa	2001	114	85.217	5.9182	2.8194	8.66667	26.1111	-2.22222	13.6111	33.8889	0	0.29	0.45	-0.31	-0.3	1.7	0.9	0.2	-0.548	-0.05	0.282	11.6078	5.1816	3.81	2.8194	13.6111	33.8889	0	-0.31	0.2	0.282	3.81	4.05556	7.83333	0.222222	4.83333	9.88889	-0.222222	3.88889	7.16667	0.666667	17	17	16	4.25926	8.2963	0.222222	50	3.33333
hewa	2002	117	110.414	4.699	4.445	10.3333	23.3333	-0.555556	12	27.7778	-0.555556	-0.64	-0.43	-0.32	-0.63	1.1	-0.2	-0.1	-0.118	0.401	0.886	2.8702	7.2898	0.3048	4.445	12	27.7778	-0.555556	-0.32	-0.1	0.886	0.3048	4.66667	7.33333	2	5.77778	10.6111	0.944444	4.55556	7.22222	1.88889	12	17	4	5	8.38889	1.61111	33	4.05556
hewa	2003	115	119.05	16.4592	3.3782	9.66667	20.5556	1.11111	13	28.8889	0	1.75	1.51	1.18	0.89	-0.7	-0.3	-0.1	0.83	0.413	0.214	3.2766	4.7498	6.4262	3.3782	13	28.8889	0	1.18	-0.1	0.214	6.4262	6.72222	10.2222	3.16667	5.88889	10.8889	0.888889	5.33333	8.22222	2.44444	12	16	6	5.98148	9.77778	2.16667	34	4.66667
hewa	2004	115	104.14	7.62	3.302	10.1667	25.2657	-0.676328	13.9444	28.8889	2.22222	0.48	0.61	0.57	0.88	1.2	0.4	-0.9	-0.306	0.358	0.558	12.7254	1.2192	0.2286	3.302	13.9444	28.8889	2.22222	0.57	-0.9	0.558	0.2286	3.88889	6.72222	1.11111	5.88889	9.83333	2	5.05556	7.77778	2.27778	13	7	8	4.94444	8.11111	1.7963	28	6.72222
hewa	2005	111	99.3648	6.6802	10.7696	10.0556	25	-0.555556	14.2222	32.2222	3.33333	0.81	1.36	1.03	1.86	-3.1	0.3	-0.6	1.057	0.626	0.885	5.9182	8.382	2.1336	10.7696	14.2222	32.2222	3.33333	1.03	-0.6	0.885	2.1336	5	8.55556	1.44444	5.22222	10.5556	-0.0555556	5.44444	8.44444	2.5	13	17	5	5.22222	9.18519	1.2963	35	3.88889
hewa	2006	117	135.636	6.35	6.223	10.6667	26.6667	-0.555556	14	33.8889	1.11111	0.66	0.05	0.4	0.48	0.1	1.8	1.1	-0.521	-0.571	0.045	5.3086	13.4366	8.3058	6.223	14	33.8889	1.11111	0.4	1.1	0.045	8.3058	5.88889	8.94444	2.83333	4.61111	9.83333	-0.666667	3.22222	6.27778	0.166667	5	18	18	4.57407	8.35185	0.777778	41	5
hewa	2007	116	95.6056	5.08	4.0894	9.72222	25	-1.11111	12.8889	30	1.11111	0.04	-0.36	0.16	-0.1	-0.1	0.2	-0.1	0.125	0.026	0.348	11.2776	0.889	3.4036	4.0894	12.8889	30	1.11111	0.16	-0.1	0.348	3.4036	2.44444	6.33333	-1.5	5.94444	9.83333	2	3.5	6.72222	0.277778	24	10	20	3.96296	7.62963	0.259259	54	5.88889
hewa	2008	115	86.4616	6.0452	0.9652	8.05556	26.6667	-1.66667	13.3889	34.4444	0.555556	-0.77	-0.71	-1.52	-1.37	2.6	1.4	0.7	-1.552	-0.858	-0.345	4.5974	0.127	0	0.9652	13.3889	34.4444	0.555556	-1.52	0.7	-0.345	0	1.83333	5.22222	-1.66667	5.11111	10.3889	-0.166667	4	7.38889	0.611111	24	21	17	3.64815	7.66667	-0.407407	62	2.44444
hewa	2009	114	89.2556	3.2766	9.271	9.27778	26.6667	-2.22222	13.2222	30.5556	1.66667	-1.55	-1.59	-1.65	-0.88	1.9	0.4	0.8	-0.705	-0.106	0.326	12.8778	5.3086	3.7084	9.271	13.2222	30.5556	1.66667	-1.65	0.8	0.326	3.7084	2.38889	7.44444	-2.66667	3.55556	9.55556	-2.44444	1.55556	6.44444	-3.33333	24	24	26	2.5	7.81481	-2.81481	74	1.83333
hewa	2010	114	130.785	11.1252	8.382	9.38889	22.2222	-1.66667	11.6667	24.4444	0	0.82	0.44	0.78	0.62	-1.5	-0.7	1.2	1.462	0.978	0.658	5.8166	7.5692	6.731	8.382	11.6667	24.4444	0	0.78	1.2	0.658	6.731	4.55556	10.2222	-1.16667	4.77778	11.6111	-2	-0.444444	5.55556	-6.44444	27	20	25	2.96296	9.12963	-3.2037	72	2.38889
hewa	2011	121	93.98	10.3124	9.0678	8.22222	20	-1.66667	11.5556	23.8889	0	-0.83	-0.69	-0.42	-0.37	2.7	2.5	1.9	-1.554	-1.387	-0.199	8.6106	17.653	0.1524	9.0678	11.5556	23.8889	0	-0.42	1.9	-0.199	0.1524	4.66667	8.16667	1.11111	4.27778	9.16667	-0.666667	5.33333	8.66667	2.05556	14	18	8	4.75926	8.66667	0.833333	40	4.55556
hewa	2012	125	149.301	11.4808	7.0866	10.8889	26.6667	0	12.6667	28.8889	0.555556	-0.85	-1.05	-0.27	-1.26	0.5	0.7	-0.3	-0.382	0.11	0.757	2.3368	10.3124	6.1468	7.0866	12.6667	28.8889	0.555556	-0.27	-0.3	0.757	6.1468	3.77778	8.16667	-0.555556	5.05556	10.2222	-0.111111	2.38889	6.77778	-1.94444	19	18	26	3.74074	8.38889	-0.87037	63	4.66667
hewa	2013	115	64.3128	5.0546	6.2484	10.9444	25.5556	-1.11111	14.3889	29.4444	3.33333	-0.43	-0.63	-0.16	0.08	-0.2	1.5	0.2	-0.026	0.09	0.205	0.9144	3.5052	1.7526	6.2484	14.3889	29.4444	3.33333	-0.16	0.2	0.205	1.7526	1.11111	5	-2.83333	4.38889	9.44444	-0.722222	4.16667	7.94444	0.333333	26	20	16	3.22222	7.46296	-1.07407	62	3.77778
hewa	2014	111	116.738	7.6708	6.6548	10.7222	24.4444	0.555556	14.6667	31.1111	1.11111	0.38	0.97	1.13	1.8	0.1	-0.9	0.8	0.018	0.295	1.001	10.5156	4.4958	4.6482	6.6548	14.6667	31.1111	1.11111	1.13	0.8	1.001	4.6482	2.83333	7.88889	-2.27778	3.38889	8.66667	-1.83333	0.0555556	5.05556	-5	25	21	27	2.09259	7.2037	-3.03704	73	1.11111
mgwa	1985	110	68.961	2.667	2.3876	11.1667	25.5556	0	12.7778	28.8889	-2.22222	0.94	0.57	0.19	0	1.2	0.8	1.2	-0.696	-0.468	-0.706	3.8608	5.1054	0	2.3876	12.7778	28.8889	-2.22222	0.19	1.2	-0.706	0	1.22222	5.55556	-3.05556	3.5	8.22222	-1.22222	2	5.66667	-1.66667	30	22	25	2.24074	6.48148	-1.98148	77	4.66667
mgwa	1986	116	111.125	4.6736	6.35	9.55556	26.1111	-1.11111	12.8333	31.6667	1.66667	1.61	2.18	1.55	1.16	-1	0.5	0.3	0.028	-0.107	0.353	21.844	8.128	2.3114	6.35	12.8333	31.6667	1.66667	1.55	0.3	0.353	2.3114	4.72222	8.33333	1.11111	5.72222	9.22222	2.27778	-0.222222	3.72222	-4.16667	16	10	27	3.40741	7.09259	-0.259259	53	1.22222
mgwa	1987	111	95.7834	3.9624	3.556	11.5556	28.3333	-0.555556	14.5556	33.3333	1.11111	1.75	2.1	2.16	1.85	-1.3	-1.4	-1.3	1.716	1.855	2.107	8.2042	7.747	0.508	3.556	14.5556	33.3333	1.11111	2.16	-1.3	2.107	0.508	3	6.72222	-0.722222	5.66667	10	1.27778	2.66667	6	-0.722222	17	10	21	3.77778	7.57407	-0.0555556	48	4.72222
mgwa	1988	119	95.3008	8.4582	9.7536	10.8333	25.5556	-0.555556	12.2222	30	1.66667	1.24	1.42	0.94	1.2	-0.4	0.6	0.1	0.495	0.389	0.193	2.5146	0.4318	4.0132	9.7536	12.2222	30	1.66667	0.94	0.1	0.193	4.0132	2.77778	5.83333	-0.222222	5.33333	10.0556	0.666667	2.72222	5.22222	0.166667	21	15	20	3.61111	7.03704	0.203704	56	3
mgwa	1989	114	75.2856	3.6068	3.7084	12.6667	26.6667	1.11111	13	26.6667	1.66667	-1.02	-0.83	-0.32	0.47	1.2	1.1	1.6	-1.035	-0.76	-0.393	3.175	15.9766	0.7874	3.7084	13	26.6667	1.66667	-0.32	1.6	-0.393	0.7874	3.94444	7.38889	0.555556	0.666667	5	-3.72222	3.38889	6.66667	0.111111	18	21	18	2.66667	6.35185	-1.01852	57	2.77778
mgwa	1996	132	185.953	12.5222	10.1092	11.1667	26.1111	1.66667	11.8333	26.1111	-1.11111	0.75	1.01	1.46	2.18	0.3	1.1	0.8	-0.236	-0.391	-0.041	13.9446	4.3942	3.175	10.1092	11.8333	26.1111	-1.11111	1.46	0.8	-0.041	3.175	4.83333	7.72222	2	4.66667	8.72222	0.555556	4.83333	7.72222	1.94444	10	15	9	4.77778	8.05556	1.5	34	5.77778
mgwa	1997	112	113.411	9.144	5.588	10.0556	23.3333	-0.555556	15.5556	31.6667	2.22222	0.28	0.65	1.05	1.83	1.7	-0.4	-0.6	-0.248	0.527	1.132	0.7112	0.8636	0.4572	5.588	15.5556	31.6667	2.22222	1.05	-0.6	1.132	0.4572	3.88889	7.38889	0.333333	4.83333	9.61111	0.111111	4.5	7.83333	1.11111	16	15	13	4.40741	8.27778	0.518519	44	4.83333
mgwa	1998	117	152.425	4.6482	14.732	9.83333	28.3333	-0.555556	12.4444	27.7778	2.22222	1.56	2.01	1.27	0.7	-2	-2.4	-1.4	2.751	2.658	2.206	25.273	6.2738	2.667	14.732	12.4444	27.7778	2.22222	1.27	-1.4	2.206	2.667	5.61111	8.77778	2.44444	6.11111	10.0556	2.16667	3.27778	6.88889	-0.388889	7	7	22	5	8.57407	1.40741	36	3.88889
mgwa	1999	140	126.492	2.7178	5.0546	9.5	27.2222	-1.11111	11.5556	30.5556	1.11111	-0.66	-0.33	-0.41	-0.68	1	1.3	1.4	-0.95	-0.88	-0.596	11.303	3.81	2.2606	5.0546	11.5556	30.5556	1.11111	-0.41	1.4	-0.596	2.2606	5.05556	7.72222	2.38889	5.11111	8.38889	1.88889	3.55556	6.55556	0.5	8	8	14	4.57407	7.55556	1.59259	30	5.61111
mgwa	2000	133	88.6968	4.1402	7.5946	10.8889	25	-2.22222	13.2778	26.6667	1.11111	-0.83	0.29	0.35	-0.05	1.7	1.3	1.2	-1.09	-0.397	0.251	21.5646	5.1562	3.5306	7.5946	13.2778	26.6667	1.11111	0.35	1.2	0.251	3.5306	3.33333	6.33333	0.277778	5.55556	9.5	1.61111	4.83333	8.22222	1.44444	18	13	11	4.57407	8.01852	1.11111	42	5.05556
mgwa	2001	123	85.217	5.9182	2.8194	8.66667	26.1111	-2.22222	13.6111	33.8889	0	0.29	0.45	-0.31	-0.3	1.7	0.9	0.2	-0.548	-0.05	0.282	11.6078	5.1816	3.81	2.8194	13.6111	33.8889	0	-0.31	0.2	0.282	3.81	4.05556	7.83333	0.222222	4.83333	9.88889	-0.222222	3.88889	7.16667	0.666667	17	17	16	4.25926	8.2963	0.222222	50	3.33333
mgwa	2002	124	110.414	4.699	4.445	10.3333	23.3333	-0.555556	12	27.7778	-0.555556	-0.64	-0.43	-0.32	-0.63	1.1	-0.2	-0.1	-0.118	0.401	0.886	2.8702	7.2898	0.3048	4.445	12	27.7778	-0.555556	-0.32	-0.1	0.886	0.3048	4.66667	7.33333	2	5.77778	10.6111	0.944444	4.55556	7.22222	1.88889	12	17	4	5	8.38889	1.61111	33	4.05556
mgwa	2003	143	119.05	16.4592	3.3782	9.66667	20.5556	1.11111	13	28.8889	0	1.75	1.51	1.18	0.89	-0.7	-0.3	-0.1	0.83	0.413	0.214	3.2766	4.7498	6.4262	3.3782	13	28.8889	0	1.18	-0.1	0.214	6.4262	6.72222	10.2222	3.16667	5.88889	10.8889	0.888889	5.33333	8.22222	2.44444	12	16	6	5.98148	9.77778	2.16667	34	4.66667
mgwa	2004	133	104.14	7.62	3.302	10.1667	25.2657	-0.676328	13.9444	28.8889	2.22222	0.48	0.61	0.57	0.88	1.2	0.4	-0.9	-0.306	0.358	0.558	12.7254	1.2192	0.2286	3.302	13.9444	28.8889	2.22222	0.57	-0.9	0.558	0.2286	3.88889	6.72222	1.11111	5.88889	9.83333	2	5.05556	7.77778	2.27778	13	7	8	4.94444	8.11111	1.7963	28	6.72222
mgwa	2005	125	99.3648	6.6802	10.7696	10.0556	25	-0.555556	14.2222	32.2222	3.33333	0.81	1.36	1.03	1.86	-3.1	0.3	-0.6	1.057	0.626	0.885	5.9182	8.382	2.1336	10.7696	14.2222	32.2222	3.33333	1.03	-0.6	0.885	2.1336	5	8.55556	1.44444	5.22222	10.5556	-0.0555556	5.44444	8.44444	2.5	13	17	5	5.22222	9.18519	1.2963	35	3.88889
mgwa	2006	117	135.636	6.35	6.223	10.6667	26.6667	-0.555556	14	33.8889	1.11111	0.66	0.05	0.4	0.48	0.1	1.8	1.1	-0.521	-0.571	0.045	5.3086	13.4366	8.3058	6.223	14	33.8889	1.11111	0.4	1.1	0.045	8.3058	5.88889	8.94444	2.83333	4.61111	9.83333	-0.666667	3.22222	6.27778	0.166667	5	18	18	4.57407	8.35185	0.777778	41	5
mgwa	2007	117	95.6056	5.08	4.0894	9.72222	25	-1.11111	12.8889	30	1.11111	0.04	-0.36	0.16	-0.1	-0.1	0.2	-0.1	0.125	0.026	0.348	11.2776	0.889	3.4036	4.0894	12.8889	30	1.11111	0.16	-0.1	0.348	3.4036	2.44444	6.33333	-1.5	5.94444	9.83333	2	3.5	6.72222	0.277778	24	10	20	3.96296	7.62963	0.259259	54	5.88889
mgwa	2008	116	86.4616	6.0452	0.9652	8.05556	26.6667	-1.66667	13.3889	34.4444	0.555556	-0.77	-0.71	-1.52	-1.37	2.6	1.4	0.7	-1.552	-0.858	-0.345	4.5974	0.127	0	0.9652	13.3889	34.4444	0.555556	-1.52	0.7	-0.345	0	1.83333	5.22222	-1.66667	5.11111	10.3889	-0.166667	4	7.38889	0.611111	24	21	17	3.64815	7.66667	-0.407407	62	2.44444
mgwa	2009	119	89.2556	3.2766	9.271	9.27778	26.6667	-2.22222	13.2222	30.5556	1.66667	-1.55	-1.59	-1.65	-0.88	1.9	0.4	0.8	-0.705	-0.106	0.326	12.8778	5.3086	3.7084	9.271	13.2222	30.5556	1.66667	-1.65	0.8	0.326	3.7084	2.38889	7.44444	-2.66667	3.55556	9.55556	-2.44444	1.55556	6.44444	-3.33333	24	24	26	2.5	7.81481	-2.81481	74	1.83333
mgwa	2010	114	130.785	11.1252	8.382	9.38889	22.2222	-1.66667	11.6667	24.4444	0	0.82	0.44	0.78	0.62	-1.5	-0.7	1.2	1.462	0.978	0.658	5.8166	7.5692	6.731	8.382	11.6667	24.4444	0	0.78	1.2	0.658	6.731	4.55556	10.2222	-1.16667	4.77778	11.6111	-2	-0.444444	5.55556	-6.44444	27	20	25	2.96296	9.12963	-3.2037	72	2.38889
mgwa	2011	132	93.98	10.3124	9.0678	8.22222	20	-1.66667	11.5556	23.8889	0	-0.83	-0.69	-0.42	-0.37	2.7	2.5	1.9	-1.554	-1.387	-0.199	8.6106	17.653	0.1524	9.0678	11.5556	23.8889	0	-0.42	1.9	-0.199	0.1524	4.66667	8.16667	1.11111	4.27778	9.16667	-0.666667	5.33333	8.66667	2.05556	14	18	8	4.75926	8.66667	0.833333	40	4.55556
mgwa	2012	126	149.301	11.4808	7.0866	10.8889	26.6667	0	12.6667	28.8889	0.555556	-0.85	-1.05	-0.27	-1.26	0.5	0.7	-0.3	-0.382	0.11	0.757	2.3368	10.3124	6.1468	7.0866	12.6667	28.8889	0.555556	-0.27	-0.3	0.757	6.1468	3.77778	8.16667	-0.555556	5.05556	10.2222	-0.111111	2.38889	6.77778	-1.94444	19	18	26	3.74074	8.38889	-0.87037	63	4.66667
mgwa	2013	115	64.3128	5.0546	6.2484	10.9444	25.5556	-1.11111	14.3889	29.4444	3.33333	-0.43	-0.63	-0.16	0.08	-0.2	1.5	0.2	-0.026	0.09	0.205	0.9144	3.5052	1.7526	6.2484	14.3889	29.4444	3.33333	-0.16	0.2	0.205	1.7526	1.11111	5	-2.83333	4.38889	9.44444	-0.722222	4.16667	7.94444	0.333333	26	20	16	3.22222	7.46296	-1.07407	62	3.77778
mgwa	2014	111	116.738	7.6708	6.6548	10.7222	24.4444	0.555556	14.6667	31.1111	1.11111	0.38	0.97	1.13	1.8	0.1	-0.9	0.8	0.018	0.295	1.001	10.5156	4.4958	4.6482	6.6548	14.6667	31.1111	1.11111	1.13	0.8	1.001	4.6482	2.83333	7.88889	-2.27778	3.38889	8.66667	-1.83333	0.0555556	5.05556	-5	25	21	27	2.09259	7.2037	-3.03704	73	1.11111
osfl	1985	141	68.961	2.667	2.3876	11.1667	25.5556	0	12.7778	28.8889	-2.22222	0.94	0.57	0.19	0	1.2	0.8	1.2	-0.696	-0.468	-0.706	3.8608	5.1054	0	2.3876	12.7778	28.8889	-2.22222	0.095	1.2	-0.706	0	1.22222	5.55556	-3.05556	3.5	8.22222	-1.22222	2	5.66667	-1.66667	30	22	25	2.24074	6.48148	-1.98148	77	4.66667
osfl	1986	166	111.125	4.6736	6.35	9.55556	26.1111	-1.11111	12.8333	31.6667	1.66667	1.61	2.18	1.55	1.16	-1	0.5	0.3	0.028	-0.107	0.353	21.844	8.128	2.3114	6.35	12.8333	31.6667	1.66667	1.355	0.3	0.353	2.3114	4.72222	8.33333	1.11111	5.72222	9.22222	2.27778	-0.222222	3.72222	-4.16667	16	10	27	3.40741	7.09259	-0.259259	53	1.22222
osfl	1988	135	95.3008	8.4582	9.7536	10.8333	25.5556	-0.555556	12.2222	30	1.66667	1.24	1.42	0.94	1.2	-0.4	0.6	0.1	0.495	0.389	0.193	2.5146	0.4318	4.0132	9.7536	12.2222	30	1.66667	1.07	0.1	0.193	4.0132	2.77778	5.83333	-0.222222	5.33333	10.0556	0.666667	2.72222	5.22222	0.166667	21	15	20	3.61111	7.03704	0.203704	56	3
osfl	1989	160	75.2856	3.6068	3.7084	12.6667	26.6667	1.11111	13	26.6667	1.66667	-1.02	-0.83	-0.32	0.47	1.2	1.1	1.6	-1.035	-0.76	-0.393	3.175	15.9766	0.7874	3.7084	13	26.6667	1.66667	0.075	1.6	-0.393	0.7874	3.94444	7.38889	0.555556	0.666667	5	-3.72222	3.38889	6.66667	0.111111	18	21	18	2.66667	6.35185	-1.01852	57	2.77778
osfl	1996	134	185.953	12.5222	10.1092	11.1667	26.1111	1.66667	11.8333	26.1111	-1.11111	0.75	1.01	1.46	2.18	0.3	1.1	0.8	-0.236	-0.391	-0.041	13.9446	4.3942	3.175	10.1092	11.8333	26.1111	-1.11111	1.82	0.8	-0.041	3.175	4.83333	7.72222	2	4.66667	8.72222	0.555556	4.83333	7.72222	1.94444	10	15	9	4.77778	8.05556	1.5	34	5.77778
osfl	1997	136	113.411	9.144	5.588	10.0556	23.3333	-0.555556	15.5556	31.6667	2.22222	0.28	0.65	1.05	1.83	1.7	-0.4	-0.6	-0.248	0.527	1.132	0.7112	0.8636	0.4572	5.588	15.5556	31.6667	2.22222	1.44	-0.6	1.132	0.4572	3.88889	7.38889	0.333333	4.83333	9.61111	0.111111	4.5	7.83333	1.11111	16	15	13	4.40741	8.27778	0.518519	44	4.83333
osfl	1998	151	152.425	4.6482	14.732	9.83333	28.3333	-0.555556	12.4444	27.7778	2.22222	1.56	2.01	1.27	0.7	-2	-2.4	-1.4	2.751	2.658	2.206	25.273	6.2738	2.667	14.732	12.4444	27.7778	2.22222	0.985	-1.4	2.206	2.667	5.61111	8.77778	2.44444	6.11111	10.0556	2.16667	3.27778	6.88889	-0.388889	7	7	22	5	8.57407	1.40741	36	3.88889
osfl	1999	144	126.492	2.7178	5.0546	9.5	27.2222	-1.11111	11.5556	30.5556	1.11111	-0.66	-0.33	-0.41	-0.68	1	1.3	1.4	-0.95	-0.88	-0.596	11.303	3.81	2.2606	5.0546	11.5556	30.5556	1.11111	-0.545	1.4	-0.596	2.2606	5.05556	7.72222	2.38889	5.11111	8.38889	1.88889	3.55556	6.55556	0.5	8	8	14	4.57407	7.55556	1.59259	30	5.61111
osfl	2000	133	88.6968	4.1402	7.5946	10.8889	25	-2.22222	13.2778	26.6667	1.11111	-0.83	0.29	0.35	-0.05	1.7	1.3	1.2	-1.09	-0.397	0.251	21.5646	5.1562	3.5306	7.5946	13.2778	26.6667	1.11111	0.15	1.2	0.251	3.5306	3.33333	6.33333	0.277778	5.55556	9.5	1.61111	4.83333	8.22222	1.44444	18	13	11	4.57407	8.01852	1.11111	42	5.05556
osfl	2001	144	85.217	5.9182	2.8194	8.66667	26.1111	-2.22222	13.6111	33.8889	0	0.29	0.45	-0.31	-0.3	1.7	0.9	0.2	-0.548	-0.05	0.282	11.6078	5.1816	3.81	2.8194	13.6111	33.8889	0	-0.305	0.2	0.282	3.81	4.05556	7.83333	0.222222	4.83333	9.88889	-0.222222	3.88889	7.16667	0.666667	17	17	16	4.25926	8.2963	0.222222	50	3.33333
osfl	2002	143	110.414	4.699	4.445	10.3333	23.3333	-0.555556	12	27.7778	-0.555556	-0.64	-0.43	-0.32	-0.63	1.1	-0.2	-0.1	-0.118	0.401	0.886	2.8702	7.2898	0.3048	4.445	12	27.7778	-0.555556	-0.475	-0.1	0.886	0.3048	4.66667	7.33333	2	5.77778	10.6111	0.944444	4.55556	7.22222	1.88889	12	17	4	5	8.38889	1.61111	33	4.05556
osfl	2003	133	119.05	16.4592	3.3782	9.66667	20.5556	1.11111	13	28.8889	0	1.75	1.51	1.18	0.89	-0.7	-0.3	-0.1	0.83	0.413	0.214	3.2766	4.7498	6.4262	3.3782	13	28.8889	0	1.035	-0.1	0.214	6.4262	6.72222	10.2222	3.16667	5.88889	10.8889	0.888889	5.33333	8.22222	2.44444	12	16	6	5.98148	9.77778	2.16667	34	4.66667
osfl	2004	129	104.14	7.62	3.302	10.1667	25.2657	-0.676328	13.9444	28.8889	2.22222	0.48	0.61	0.57	0.88	1.2	0.4	-0.9	-0.306	0.358	0.558	12.7254	1.2192	0.2286	3.302	13.9444	28.8889	2.22222	0.725	-0.9	0.558	0.2286	3.88889	6.72222	1.11111	5.88889	9.83333	2	5.05556	7.77778	2.27778	13	7	8	4.94444	8.11111	1.7963	28	6.72222
osfl	2005	135	99.3648	6.6802	10.7696	10.0556	25	-0.555556	14.2222	32.2222	3.33333	0.81	1.36	1.03	1.86	-3.1	0.3	-0.6	1.057	0.626	0.885	5.9182	8.382	2.1336	10.7696	14.2222	32.2222	3.33333	1.445	-0.6	0.885	2.1336	5	8.55556	1.44444	5.22222	10.5556	-0.0555556	5.44444	8.44444	2.5	13	17	5	5.22222	9.18519	1.2963	35	3.88889
osfl	2006	130	135.636	6.35	6.223	10.6667	26.6667	-0.555556	14	33.8889	1.11111	0.66	0.05	0.4	0.48	0.1	1.8	1.1	-0.521	-0.571	0.045	5.3086	13.4366	8.3058	6.223	14	33.8889	1.11111	0.44	1.1	0.045	8.3058	5.88889	8.94444	2.83333	4.61111	9.83333	-0.666667	3.22222	6.27778	0.166667	5	18	18	4.57407	8.35185	0.777778	41	5
osfl	2007	133	95.6056	5.08	4.0894	9.72222	25	-1.11111	12.8889	30	1.11111	0.04	-0.36	0.16	-0.1	-0.1	0.2	-0.1	0.125	0.026	0.348	11.2776	0.889	3.4036	4.0894	12.8889	30	1.11111	0.03	-0.1	0.348	3.4036	2.44444	6.33333	-1.5	5.94444	9.83333	2	3.5	6.72222	0.277778	24	10	20	3.96296	7.62963	0.259259	54	5.88889
osfl	2008	123	86.4616	6.0452	0.9652	8.05556	26.6667	-1.66667	13.3889	34.4444	0.555556	-0.77	-0.71	-1.52	-1.37	2.6	1.4	0.7	-1.552	-0.858	-0.345	4.5974	0.127	0	0.9652	13.3889	34.4444	0.555556	-1.445	0.7	-0.345	0	1.83333	5.22222	-1.66667	5.11111	10.3889	-0.166667	4	7.38889	0.611111	24	21	17	3.64815	7.66667	-0.407407	62	2.44444
osfl	2009	136	89.2556	3.2766	9.271	9.27778	26.6667	-2.22222	13.2222	30.5556	1.66667	-1.55	-1.59	-1.65	-0.88	1.9	0.4	0.8	-0.705	-0.106	0.326	12.8778	5.3086	3.7084	9.271	13.2222	30.5556	1.66667	-1.265	0.8	0.326	3.7084	2.38889	7.44444	-2.66667	3.55556	9.55556	-2.44444	1.55556	6.44444	-3.33333	24	24	26	2.5	7.81481	-2.81481	74	1.83333
osfl	2010	149	130.785	11.1252	8.382	9.38889	22.2222	-1.66667	11.6667	24.4444	0	0.82	0.44	0.78	0.62	-1.5	-0.7	1.2	1.462	0.978	0.658	5.8166	7.5692	6.731	8.382	11.6667	24.4444	0	0.7	1.2	0.658	6.731	4.55556	10.2222	-1.16667	4.77778	11.6111	-2	-0.444444	5.55556	-6.44444	27	20	25	2.96296	9.12963	-3.2037	72	2.38889
osfl	2011	139	93.98	10.3124	9.0678	8.22222	20	-1.66667	11.5556	23.8889	0	-0.83	-0.69	-0.42	-0.37	2.7	2.5	1.9	-1.554	-1.387	-0.199	8.6106	17.653	0.1524	9.0678	11.5556	23.8889	0	-0.395	1.9	-0.199	0.1524	4.66667	8.16667	1.11111	4.27778	9.16667	-0.666667	5.33333	8.66667	2.05556	14	18	8	4.75926	8.66667	0.833333	40	4.55556
osfl	2012	131	149.301	11.4808	7.0866	10.8889	26.6667	0	12.6667	28.8889	0.555556	-0.85	-1.05	-0.27	-1.26	0.5	0.7	-0.3	-0.382	0.11	0.757	2.3368	10.3124	6.1468	7.0866	12.6667	28.8889	0.555556	-0.765	-0.3	0.757	6.1468	3.77778	8.16667	-0.555556	5.05556	10.2222	-0.111111	2.38889	6.77778	-1.94444	19	18	26	3.74074	8.38889	-0.87037	63	4.66667
osfl	2013	130	64.3128	5.0546	6.2484	10.9444	25.5556	-1.11111	14.3889	29.4444	3.33333	-0.43	-0.63	-0.16	0.08	-0.2	1.5	0.2	-0.026	0.09	0.205	0.9144	3.5052	1.7526	6.2484	14.3889	29.4444	3.33333	-0.04	0.2	0.205	1.7526	1.11111	5	-2.83333	4.38889	9.44444	-0.722222	4.16667	7.94444	0.333333	26	20	16	3.22222	7.46296	-1.07407	62	3.77778
osfl	2014	141	116.738	7.6708	6.6548	10.7222	24.4444	0.555556	14.6667	31.1111	1.11111	0.38	0.97	1.13	1.8	0.1	-0.9	0.8	0.018	0.295	1.001	10.5156	4.4958	4.6482	6.6548	14.6667	31.1111	1.11111	1.465	0.8	1.001	4.6482	2.83333	7.88889	-2.27778	3.38889	8.66667	-1.83333	0.0555556	5.05556	-5	25	21	27	2.09259	7.2037	-3.03704	73	1.11111
psfl	1996	124	185.953	12.5222	10.1092	11.1667	26.1111	1.66667	11.8333	26.1111	-1.11111	0.75	1.01	1.46	2.18	0.3	1.1	0.8	-0.236	-0.391	-0.041	13.9446	4.3942	3.175	10.1092	11.8333	26.1111	-1.11111	1.46	0.8	-0.041	3.175	4.83333	7.72222	2	4.66667	8.72222	0.555556	4.83333	7.72222	1.94444	10	15	9	4.77778	8.05556	1.5	34	5.77778
psfl	1997	116	113.411	9.144	5.588	10.0556	23.3333	-0.555556	15.5556	31.6667	2.22222	0.28	0.65	1.05	1.83	1.7	-0.4	-0.6	-0.248	0.527	1.132	0.7112	0.8636	0.4572	5.588	15.5556	31.6667	2.22222	1.05	-0.6	1.132	0.4572	3.88889	7.38889	0.333333	4.83333	9.61111	0.111111	4.5	7.83333	1.11111	16	15	13	4.40741	8.27778	0.518519	44	4.83333
psfl	1998	109	152.425	4.6482	14.732	9.83333	28.3333	-0.555556	12.4444	27.7778	2.22222	1.56	2.01	1.27	0.7	-2	-2.4	-1.4	2.751	2.658	2.206	25.273	6.2738	2.667	14.732	12.4444	27.7778	2.22222	1.27	-1.4	2.206	2.667	5.61111	8.77778	2.44444	6.11111	10.0556	2.16667	3.27778	6.88889	-0.388889	7	7	22	5	8.57407	1.40741	36	3.88889
psfl	1999	114	126.492	2.7178	5.0546	9.5	27.2222	-1.11111	11.5556	30.5556	1.11111	-0.66	-0.33	-0.41	-0.68	1	1.3	1.4	-0.95	-0.88	-0.596	11.303	3.81	2.2606	5.0546	11.5556	30.5556	1.11111	-0.41	1.4	-0.596	2.2606	5.05556	7.72222	2.38889	5.11111	8.38889	1.88889	3.55556	6.55556	0.5	8	8	14	4.57407	7.55556	1.59259	30	5.61111
psfl	2000	120	88.6968	4.1402	7.5946	10.8889	25	-2.22222	13.2778	26.6667	1.11111	-0.83	0.29	0.35	-0.05	1.7	1.3	1.2	-1.09	-0.397	0.251	21.5646	5.1562	3.5306	7.5946	13.2778	26.6667	1.11111	0.35	1.2	0.251	3.5306	3.33333	6.33333	0.277778	5.55556	9.5	1.61111	4.83333	8.22222	1.44444	18	13	11	4.57407	8.01852	1.11111	42	5.05556
psfl	2001	116	85.217	5.9182	2.8194	8.66667	26.1111	-2.22222	13.6111	33.8889	0	0.29	0.45	-0.31	-0.3	1.7	0.9	0.2	-0.548	-0.05	0.282	11.6078	5.1816	3.81	2.8194	13.6111	33.8889	0	-0.31	0.2	0.282	3.81	4.05556	7.83333	0.222222	4.83333	9.88889	-0.222222	3.88889	7.16667	0.666667	17	17	16	4.25926	8.2963	0.222222	50	3.33333
psfl	2002	129	110.414	4.699	4.445	10.3333	23.3333	-0.555556	12	27.7778	-0.555556	-0.64	-0.43	-0.32	-0.63	1.1	-0.2	-0.1	-0.118	0.401	0.886	2.8702	7.2898	0.3048	4.445	12	27.7778	-0.555556	-0.32	-0.1	0.886	0.3048	4.66667	7.33333	2	5.77778	10.6111	0.944444	4.55556	7.22222	1.88889	12	17	4	5	8.38889	1.61111	33	4.05556
psfl	2003	120	119.05	16.4592	3.3782	9.66667	20.5556	1.11111	13	28.8889	0	1.75	1.51	1.18	0.89	-0.7	-0.3	-0.1	0.83	0.413	0.214	3.2766	4.7498	6.4262	3.3782	13	28.8889	0	1.18	-0.1	0.214	6.4262	6.72222	10.2222	3.16667	5.88889	10.8889	0.888889	5.33333	8.22222	2.44444	12	16	6	5.98148	9.77778	2.16667	34	4.66667
psfl	2004	114	104.14	7.62	3.302	10.1667	25.2657	-0.676328	13.9444	28.8889	2.22222	0.48	0.61	0.57	0.88	1.2	0.4	-0.9	-0.306	0.358	0.558	12.7254	1.2192	0.2286	3.302	13.9444	28.8889	2.22222	0.57	-0.9	0.558	0.2286	3.88889	6.72222	1.11111	5.88889	9.83333	2	5.05556	7.77778	2.27778	13	7	8	4.94444	8.11111	1.7963	28	6.72222
psfl	2005	112	99.3648	6.6802	10.7696	10.0556	25	-0.555556	14.2222	32.2222	3.33333	0.81	1.36	1.03	1.86	-3.1	0.3	-0.6	1.057	0.626	0.885	5.9182	8.382	2.1336	10.7696	14.2222	32.2222	3.33333	1.03	-0.6	0.885	2.1336	5	8.55556	1.44444	5.22222	10.5556	-0.0555556	5.44444	8.44444	2.5	13	17	5	5.22222	9.18519	1.2963	35	3.88889
psfl	2006	113	135.636	6.35	6.223	10.6667	26.6667	-0.555556	14	33.8889	1.11111	0.66	0.05	0.4	0.48	0.1	1.8	1.1	-0.521	-0.571	0.045	5.3086	13.4366	8.3058	6.223	14	33.8889	1.11111	0.4	1.1	0.045	8.3058	5.88889	8.94444	2.83333	4.61111	9.83333	-0.666667	3.22222	6.27778	0.166667	5	18	18	4.57407	8.35185	0.777778	41	5
psfl	2007	117	95.6056	5.08	4.0894	9.72222	25	-1.11111	12.8889	30	1.11111	0.04	-0.36	0.16	-0.1	-0.1	0.2	-0.1	0.125	0.026	0.348	11.2776	0.889	3.4036	4.0894	12.8889	30	1.11111	0.16	-0.1	0.348	3.4036	2.44444	6.33333	-1.5	5.94444	9.83333	2	3.5	6.72222	0.277778	24	10	20	3.96296	7.62963	0.259259	54	5.88889
psfl	2008	116	86.4616	6.0452	0.9652	8.05556	26.6667	-1.66667	13.3889	34.4444	0.555556	-0.77	-0.71	-1.52	-1.37	2.6	1.4	0.7	-1.552	-0.858	-0.345	4.5974	0.127	0	0.9652	13.3889	34.4444	0.555556	-1.52	0.7	-0.345	0	1.83333	5.22222	-1.66667	5.11111	10.3889	-0.166667	4	7.38889	0.611111	24	21	17	3.64815	7.66667	-0.407407	62	2.44444
psfl	2009	114	89.2556	3.2766	9.271	9.27778	26.6667	-2.22222	13.2222	30.5556	1.66667	-1.55	-1.59	-1.65	-0.88	1.9	0.4	0.8	-0.705	-0.106	0.326	12.8778	5.3086	3.7084	9.271	13.2222	30.5556	1.66667	-1.65	0.8	0.326	3.7084	2.38889	7.44444	-2.66667	3.55556	9.55556	-2.44444	1.55556	6.44444	-3.33333	24	24	26	2.5	7.81481	-2.81481	74	1.83333
psfl	2010	112	130.785	11.1252	8.382	9.38889	22.2222	-1.66667	11.6667	24.4444	0	0.82	0.44	0.78	0.62	-1.5	-0.7	1.2	1.462	0.978	0.658	5.8166	7.5692	6.731	8.382	11.6667	24.4444	0	0.78	1.2	0.658	6.731	4.55556	10.2222	-1.16667	4.77778	11.6111	-2	-0.444444	5.55556	-6.44444	27	20	25	2.96296	9.12963	-3.2037	72	2.38889
psfl	2011	121	93.98	10.3124	9.0678	8.22222	20	-1.66667	11.5556	23.8889	0	-0.83	-0.69	-0.42	-0.37	2.7	2.5	1.9	-1.554	-1.387	-0.199	8.6106	17.653	0.1524	9.0678	11.5556	23.8889	0	-0.42	1.9	-0.199	0.1524	4.66667	8.16667	1.11111	4.27778	9.16667	-0.666667	5.33333	8.66667	2.05556	14	18	8	4.75926	8.66667	0.833333	40	4.55556
psfl	2012	116	149.301	11.4808	7.0866	10.8889	26.6667	0	12.6667	28.8889	0.555556	-0.85	-1.05	-0.27	-1.26	0.5	0.7	-0.3	-0.382	0.11	0.757	2.3368	10.3124	6.1468	7.0866	12.6667	28.8889	0.555556	-0.27	-0.3	0.757	6.1468	3.77778	8.16667	-0.555556	5.05556	10.2222	-0.111111	2.38889	6.77778	-1.94444	19	18	26	3.74074	8.38889	-0.87037	63	4.66667
psfl	2013	118	64.3128	5.0546	6.2484	10.9444	25.5556	-1.11111	14.3889	29.4444	3.33333	-0.43	-0.63	-0.16	0.08	-0.2	1.5	0.2	-0.026	0.09	0.205	0.9144	3.5052	1.7526	6.2484	14.3889	29.4444	3.33333	-0.16	0.2	0.205	1.7526	1.11111	5	-2.83333	4.38889	9.44444	-0.722222	4.16667	7.94444	0.333333	26	20	16	3.22222	7.46296	-1.07407	62	3.77778
psfl	2014	111	116.738	7.6708	6.6548	10.7222	24.4444	0.555556	14.6667	31.1111	1.11111	0.38	0.97	1.13	1.8	0.1	-0.9	0.8	0.018	0.295	1.001	10.5156	4.4958	4.6482	6.6548	14.6667	31.1111	1.11111	1.13	0.8	1.001	4.6482	2.83333	7.88889	-2.27778	3.38889	8.66667	-1.83333	0.0555556	5.05556	-5	25	21	27	2.09259	7.2037	-3.03704	73	1.11111
ruhu	1985	71	68.961	2.667	2.3876	11.1667	25.5556	0	12.7778	28.8889	-2.22222	0.94	0.57	0.19	0	1.2	0.8	1.2	-0.696	-0.468	-0.706	3.8608	5.1054	0	2.667	11.1667	25.5556	0	0.755	1	-0.582	4.4831	1.22222	5.55556	-3.05556	3.5	8.22222	-1.22222	2	5.66667	-1.66667	30	22	25	2.24074	6.48148	-1.98148	77	4.66667
ruhu	1986	62	111.125	4.6736	6.35	9.55556	26.1111	-1.11111	12.8333	31.6667	1.66667	1.61	2.18	1.55	1.16	-1	0.5	0.3	0.028	-0.107	0.353	21.844	8.128	2.3114	4.6736	9.55556	26.1111	-1.11111	1.895	-0.25	-0.0395	14.986	4.72222	8.33333	1.11111	5.72222	9.22222	2.27778	-0.222222	3.72222	-4.16667	16	10	27	3.40741	7.09259	-0.259259	53	1.22222
ruhu	1987	63	95.7834	3.9624	3.556	11.5556	28.3333	-0.555556	14.5556	33.3333	1.11111	1.75	2.1	2.16	1.85	-1.3	-1.4	-1.3	1.716	1.855	2.107	8.2042	7.747	0.508	3.9624	11.5556	28.3333	-0.555556	1.925	-1.35	1.7855	7.9756	3	6.72222	-0.722222	5.66667	10	1.27778	2.66667	6	-0.722222	17	10	21	3.77778	7.57407	-0.0555556	48	4.72222
ruhu	1988	62	95.3008	8.4582	9.7536	10.8333	25.5556	-0.555556	12.2222	30	1.66667	1.24	1.42	0.94	1.2	-0.4	0.6	0.1	0.495	0.389	0.193	2.5146	0.4318	4.0132	8.4582	10.8333	25.5556	-0.555556	1.33	0.1	0.442	1.4732	2.77778	5.83333	-0.222222	5.33333	10.0556	0.666667	2.72222	5.22222	0.166667	21	15	20	3.61111	7.03704	0.203704	56	3
ruhu	1989	66	75.2856	3.6068	3.7084	12.6667	26.6667	1.11111	13	26.6667	1.66667	-1.02	-0.83	-0.32	0.47	1.2	1.1	1.6	-1.035	-0.76	-0.393	3.175	15.9766	0.7874	3.6068	12.6667	26.6667	1.11111	-0.925	1.15	-0.8975	9.5758	3.94444	7.38889	0.555556	0.666667	5	-3.72222	3.38889	6.66667	0.111111	18	21	18	2.66667	6.35185	-1.01852	57	2.77778
ruhu	1996	71	185.953	12.5222	10.1092	11.1667	26.1111	1.66667	11.8333	26.1111	-1.11111	0.75	1.01	1.46	2.18	0.3	1.1	0.8	-0.236	-0.391	-0.041	13.9446	4.3942	3.175	12.5222	11.1667	26.1111	1.66667	0.88	0.7	-0.3135	9.1694	4.83333	7.72222	2	4.66667	8.72222	0.555556	4.83333	7.72222	1.94444	10	15	9	4.77778	8.05556	1.5	34	5.77778
ruhu	1997	73	113.411	9.144	5.588	10.0556	23.3333	-0.555556	15.5556	31.6667	2.22222	0.28	0.65	1.05	1.83	1.7	-0.4	-0.6	-0.248	0.527	1.132	0.7112	0.8636	0.4572	9.144	10.0556	23.3333	-0.555556	0.465	0.65	0.1395	0.7874	3.88889	7.38889	0.333333	4.83333	9.61111	0.111111	4.5	7.83333	1.11111	16	15	13	4.40741	8.27778	0.518519	44	4.83333
ruhu	1998	71	152.425	4.6482	14.732	9.83333	28.3333	-0.555556	12.4444	27.7778	2.22222	1.56	2.01	1.27	0.7	-2	-2.4	-1.4	2.751	2.658	2.206	25.273	6.2738	2.667	4.6482	9.83333	28.3333	-0.555556	1.785	-2.2	2.7045	15.7734	5.61111	8.77778	2.44444	6.11111	10.0556	2.16667	3.27778	6.88889	-0.388889	7	7	22	5	8.57407	1.40741	36	3.88889
ruhu	1999	71	126.492	2.7178	5.0546	9.5	27.2222	-1.11111	11.5556	30.5556	1.11111	-0.66	-0.33	-0.41	-0.68	1	1.3	1.4	-0.95	-0.88	-0.596	11.303	3.81	2.2606	2.7178	9.5	27.2222	-1.11111	-0.495	1.15	-0.915	7.5565	5.05556	7.72222	2.38889	5.11111	8.38889	1.88889	3.55556	6.55556	0.5	8	8	14	4.57407	7.55556	1.59259	30	5.61111
ruhu	2000	67	88.6968	4.1402	7.5946	10.8889	25	-2.22222	13.2778	26.6667	1.11111	-0.83	0.29	0.35	-0.05	1.7	1.3	1.2	-1.09	-0.397	0.251	21.5646	5.1562	3.5306	4.1402	10.8889	25	-2.22222	-0.27	1.5	-0.7435	13.3604	3.33333	6.33333	0.277778	5.55556	9.5	1.61111	4.83333	8.22222	1.44444	18	13	11	4.57407	8.01852	1.11111	42	5.05556
ruhu	2001	65	85.217	5.9182	2.8194	8.66667	26.1111	-2.22222	13.6111	33.8889	0	0.29	0.45	-0.31	-0.3	1.7	0.9	0.2	-0.548	-0.05	0.282	11.6078	5.1816	3.81	5.9182	8.66667	26.1111	-2.22222	0.37	1.3	-0.299	8.3947	4.05556	7.83333	0.222222	4.83333	9.88889	-0.222222	3.88889	7.16667	0.666667	17	17	16	4.25926	8.2963	0.222222	50	3.33333
ruhu	2002	58	110.414	4.699	4.445	10.3333	23.3333	-0.555556	12	27.7778	-0.555556	-0.64	-0.43	-0.32	-0.63	1.1	-0.2	-0.1	-0.118	0.401	0.886	2.8702	7.2898	0.3048	4.699	10.3333	23.3333	-0.555556	-0.535	0.45	0.1415	5.08	4.66667	7.33333	2	5.77778	10.6111	0.944444	4.55556	7.22222	1.88889	12	17	4	5	8.38889	1.61111	33	4.05556
ruhu	2003	58	119.05	16.4592	3.3782	9.66667	20.5556	1.11111	13	28.8889	0	1.75	1.51	1.18	0.89	-0.7	-0.3	-0.1	0.83	0.413	0.214	3.2766	4.7498	6.4262	16.4592	9.66667	20.5556	1.11111	1.63	-0.5	0.6215	4.0132	6.72222	10.2222	3.16667	5.88889	10.8889	0.888889	5.33333	8.22222	2.44444	12	16	6	5.98148	9.77778	2.16667	34	4.66667
ruhu	2004	66	104.14	7.62	3.302	10.1667	25.2657	-0.676328	13.9444	28.8889	2.22222	0.48	0.61	0.57	0.88	1.2	0.4	-0.9	-0.306	0.358	0.558	12.7254	1.2192	0.2286	7.62	10.1667	25.2657	-0.676328	0.545	0.8	0.026	6.9723	3.88889	6.72222	1.11111	5.88889	9.83333	2	5.05556	7.77778	2.27778	13	7	8	4.94444	8.11111	1.7963	28	6.72222
ruhu	2005	60	99.3648	6.6802	10.7696	10.0556	25	-0.555556	14.2222	32.2222	3.33333	0.81	1.36	1.03	1.86	-3.1	0.3	-0.6	1.057	0.626	0.885	5.9182	8.382	2.1336	6.6802	10.0556	25	-0.555556	1.085	-1.4	0.8415	7.1501	5	8.55556	1.44444	5.22222	10.5556	-0.0555556	5.44444	8.44444	2.5	13	17	5	5.22222	9.18519	1.2963	35	3.88889
ruhu	2006	62	135.636	6.35	6.223	10.6667	26.6667	-0.555556	14	33.8889	1.11111	0.66	0.05	0.4	0.48	0.1	1.8	1.1	-0.521	-0.571	0.045	5.3086	13.4366	8.3058	6.35	10.6667	26.6667	-0.555556	0.355	0.95	-0.546	9.3726	5.88889	8.94444	2.83333	4.61111	9.83333	-0.666667	3.22222	6.27778	0.166667	5	18	18	4.57407	8.35185	0.777778	41	5
ruhu	2007	63	95.6056	5.08	4.0894	9.72222	25	-1.11111	12.8889	30	1.11111	0.04	-0.36	0.16	-0.1	-0.1	0.2	-0.1	0.125	0.026	0.348	11.2776	0.889	3.4036	5.08	9.72222	25	-1.11111	-0.16	0.05	0.0755	6.0833	2.44444	6.33333	-1.5	5.94444	9.83333	2	3.5	6.72222	0.277778	24	10	20	3.96296	7.62963	0.259259	54	5.88889
ruhu	2008	61	86.4616	6.0452	0.9652	8.05556	26.6667	-1.66667	13.3889	34.4444	0.555556	-0.77	-0.71	-1.52	-1.37	2.6	1.4	0.7	-1.552	-0.858	-0.345	4.5974	0.127	0	6.0452	8.05556	26.6667	-1.66667	-0.74	2	-1.205	2.3622	1.83333	5.22222	-1.66667	5.11111	10.3889	-0.166667	4	7.38889	0.611111	24	21	17	3.64815	7.66667	-0.407407	62	2.44444
ruhu	2009	65	89.2556	3.2766	9.271	9.27778	26.6667	-2.22222	13.2222	30.5556	1.66667	-1.55	-1.59	-1.65	-0.88	1.9	0.4	0.8	-0.705	-0.106	0.326	12.8778	5.3086	3.7084	3.2766	9.27778	26.6667	-2.22222	-1.57	1.15	-0.4055	9.0932	2.38889	7.44444	-2.66667	3.55556	9.55556	-2.44444	1.55556	6.44444	-3.33333	24	24	26	2.5	7.81481	-2.81481	74	1.83333
ruhu	2010	73	130.785	11.1252	8.382	9.38889	22.2222	-1.66667	11.6667	24.4444	0	0.82	0.44	0.78	0.62	-1.5	-0.7	1.2	1.462	0.978	0.658	5.8166	7.5692	6.731	11.1252	9.38889	22.2222	-1.66667	0.63	-1.1	1.22	6.6929	4.55556	10.2222	-1.16667	4.77778	11.6111	-2	-0.444444	5.55556	-6.44444	27	20	25	2.96296	9.12963	-3.2037	72	2.38889
ruhu	2011	67	93.98	10.3124	9.0678	8.22222	20	-1.66667	11.5556	23.8889	0	-0.83	-0.69	-0.42	-0.37	2.7	2.5	1.9	-1.554	-1.387	-0.199	8.6106	17.653	0.1524	10.3124	8.22222	20	-1.66667	-0.76	2.6	-1.4705	13.1318	4.66667	8.16667	1.11111	4.27778	9.16667	-0.666667	5.33333	8.66667	2.05556	14	18	8	4.75926	8.66667	0.833333	40	4.55556
ruhu	2012	67	149.301	11.4808	7.0866	10.8889	26.6667	0	12.6667	28.8889	0.555556	-0.85	-1.05	-0.27	-1.26	0.5	0.7	-0.3	-0.382	0.11	0.757	2.3368	10.3124	6.1468	11.4808	10.8889	26.6667	0	-0.95	0.6	-0.136	6.3246	3.77778	8.16667	-0.555556	5.05556	10.2222	-0.111111	2.38889	6.77778	-1.94444	19	18	26	3.74074	8.38889	-0.87037	63	4.66667
ruhu	2013	67	64.3128	5.0546	6.2484	10.9444	25.5556	-1.11111	14.3889	29.4444	3.33333	-0.43	-0.63	-0.16	0.08	-0.2	1.5	0.2	-0.026	0.09	0.205	0.9144	3.5052	1.7526	5.0546	10.9444	25.5556	-1.11111	-0.53	0.65	0.032	2.2098	1.11111	5	-2.83333	4.38889	9.44444	-0.722222	4.16667	7.94444	0.333333	26	20	16	3.22222	7.46296	-1.07407	62	3.77778
ruhu	2014	66	116.738	7.6708	6.6548	10.7222	24.4444	0.555556	14.6667	31.1111	1.11111	0.38	0.97	1.13	1.8	0.1	-0.9	0.8	0.018	0.295	1.001	10.5156	4.4958	4.6482	7.6708	10.7222	24.4444	0.555556	0.675	-0.4	0.1565	7.5057	2.83333	7.88889	-2.27778	3.38889	8.66667	-1.83333	0.0555556	5.05556	-5	25	21	27	2.09259	7.2037	-3.03704	73	1.11111
swth	1985	136	68.961	2.667	2.3876	11.1667	25.5556	0	12.7778	28.8889	-2.22222	0.94	0.57	0.19	0	1.2	0.8	1.2	-0.696	-0.468	-0.706	3.8608	5.1054	0	2.3876	12.7778	28.8889	-2.22222	0.095	1.2	-0.706	0	1.22222	5.55556	-3.05556	3.5	8.22222	-1.22222	2	5.66667	-1.66667	30	22	25	2.24074	6.48148	-1.98148	77	4.66667
swth	1986	140	111.125	4.6736	6.35	9.55556	26.1111	-1.11111	12.8333	31.6667	1.66667	1.61	2.18	1.55	1.16	-1	0.5	0.3	0.028	-0.107	0.353	21.844	8.128	2.3114	6.35	12.8333	31.6667	1.66667	1.355	0.3	0.353	2.3114	4.72222	8.33333	1.11111	5.72222	9.22222	2.27778	-0.222222	3.72222	-4.16667	16	10	27	3.40741	7.09259	-0.259259	53	1.22222
swth	1987	130	95.7834	3.9624	3.556	11.5556	28.3333	-0.555556	14.5556	33.3333	1.11111	1.75	2.1	2.16	1.85	-1.3	-1.4	-1.3	1.716	1.855	2.107	8.2042	7.747	0.508	3.556	14.5556	33.3333	1.11111	2.005	-1.3	2.107	0.508	3	6.72222	-0.722222	5.66667	10	1.27778	2.66667	6	-0.722222	17	10	21	3.77778	7.57407	-0.0555556	48	4.72222
swth	1988	139	95.3008	8.4582	9.7536	10.8333	25.5556	-0.555556	12.2222	30	1.66667	1.24	1.42	0.94	1.2	-0.4	0.6	0.1	0.495	0.389	0.193	2.5146	0.4318	4.0132	9.7536	12.2222	30	1.66667	1.07	0.1	0.193	4.0132	2.77778	5.83333	-0.222222	5.33333	10.0556	0.666667	2.72222	5.22222	0.166667	21	15	20	3.61111	7.03704	0.203704	56	3
swth	1989	130	75.2856	3.6068	3.7084	12.6667	26.6667	1.11111	13	26.6667	1.66667	-1.02	-0.83	-0.32	0.47	1.2	1.1	1.6	-1.035	-0.76	-0.393	3.175	15.9766	0.7874	3.7084	13	26.6667	1.66667	0.075	1.6	-0.393	0.7874	3.94444	7.38889	0.555556	0.666667	5	-3.72222	3.38889	6.66667	0.111111	18	21	18	2.66667	6.35185	-1.01852	57	2.77778
swth	1996	133	185.953	12.5222	10.1092	11.1667	26.1111	1.66667	11.8333	26.1111	-1.11111	0.75	1.01	1.46	2.18	0.3	1.1	0.8	-0.236	-0.391	-0.041	13.9446	4.3942	3.175	10.1092	11.8333	26.1111	-1.11111	1.82	0.8	-0.041	3.175	4.83333	7.72222	2	4.66667	8.72222	0.555556	4.83333	7.72222	1.94444	10	15	9	4.77778	8.05556	1.5	34	5.77778
swth	1997	127	113.411	9.144	5.588	10.0556	23.3333	-0.555556	15.5556	31.6667	2.22222	0.28	0.65	1.05	1.83	1.7	-0.4	-0.6	-0.248	0.527	1.132	0.7112	0.8636	0.4572	5.588	15.5556	31.6667	2.22222	1.44	-0.6	1.132	0.4572	3.88889	7.38889	0.333333	4.83333	9.61111	0.111111	4.5	7.83333	1.11111	16	15	13	4.40741	8.27778	0.518519	44	4.83333
swth	1998	129	152.425	4.6482	14.732	9.83333	28.3333	-0.555556	12.4444	27.7778	2.22222	1.56	2.01	1.27	0.7	-2	-2.4	-1.4	2.751	2.658	2.206	25.273	6.2738	2.667	14.732	12.4444	27.7778	2.22222	0.985	-1.4	2.206	2.667	5.61111	8.77778	2.44444	6.11111	10.0556	2.16667	3.27778	6.88889	-0.388889	7	7	22	5	8.57407	1.40741	36	3.88889
swth	1999	126	126.492	2.7178	5.0546	9.5	27.2222	-1.11111	11.5556	30.5556	1.11111	-0.66	-0.33	-0.41	-0.68	1	1.3	1.4	-0.95	-0.88	-0.596	11.303	3.81	2.2606	5.0546	11.5556	30.5556	1.11111	-0.545	1.4	-0.596	2.2606	5.05556	7.72222	2.38889	5.11111	8.38889	1.88889	3.55556	6.55556	0.5	8	8	14	4.57407	7.55556	1.59259	30	5.61111
swth	2000	133	88.6968	4.1402	7.5946	10.8889	25	-2.22222	13.2778	26.6667	1.11111	-0.83	0.29	0.35	-0.05	1.7	1.3	1.2	-1.09	-0.397	0.251	21.5646	5.1562	3.5306	7.5946	13.2778	26.6667	1.11111	0.15	1.2	0.251	3.5306	3.33333	6.33333	0.277778	5.55556	9.5	1.61111	4.83333	8.22222	1.44444	18	13	11	4.57407	8.01852	1.11111	42	5.05556
swth	2001	128	85.217	5.9182	2.8194	8.66667	26.1111	-2.22222	13.6111	33.8889	0	0.29	0.45	-0.31	-0.3	1.7	0.9	0.2	-0.548	-0.05	0.282	11.6078	5.1816	3.81	2.8194	13.6111	33.8889	0	-0.305	0.2	0.282	3.81	4.05556	7.83333	0.222222	4.83333	9.88889	-0.222222	3.88889	7.16667	0.666667	17	17	16	4.25926	8.2963	0.222222	50	3.33333
swth	2002	129	110.414	4.699	4.445	10.3333	23.3333	-0.555556	12	27.7778	-0.555556	-0.64	-0.43	-0.32	-0.63	1.1	-0.2	-0.1	-0.118	0.401	0.886	2.8702	7.2898	0.3048	4.445	12	27.7778	-0.555556	-0.475	-0.1	0.886	0.3048	4.66667	7.33333	2	5.77778	10.6111	0.944444	4.55556	7.22222	1.88889	12	17	4	5	8.38889	1.61111	33	4.05556
swth	2003	138	119.05	16.4592	3.3782	9.66667	20.5556	1.11111	13	28.8889	0	1.75	1.51	1.18	0.89	-0.7	-0.3	-0.1	0.83	0.413	0.214	3.2766	4.7498	6.4262	3.3782	13	28.8889	0	1.035	-0.1	0.214	6.4262	6.72222	10.2222	3.16667	5.88889	10.8889	0.888889	5.33333	8.22222	2.44444	12	16	6	5.98148	9.77778	2.16667	34	4.66667
swth	2004	125	104.14	7.62	3.302	10.1667	25.2657	-0.676328	13.9444	28.8889	2.22222	0.48	0.61	0.57	0.88	1.2	0.4	-0.9	-0.306	0.358	0.558	12.7254	1.2192	0.2286	3.302	13.9444	28.8889	2.22222	0.725	-0.9	0.558	0.2286	3.88889	6.72222	1.11111	5.88889	9.83333	2	5.05556	7.77778	2.27778	13	7	8	4.94444	8.11111	1.7963	28	6.72222
swth	2005	134	99.3648	6.6802	10.7696	10.0556	25	-0.555556	14.2222	32.2222	3.33333	0.81	1.36	1.03	1.86	-3.1	0.3	-0.6	1.057	0.626	0.885	5.9182	8.382	2.1336	10.7696	14.2222	32.2222	3.33333	1.445	-0.6	0.885	2.1336	5	8.55556	1.44444	5.22222	10.5556	-0.0555556	5.44444	8.44444	2.5	13	17	5	5.22222	9.18519	1.2963	35	3.88889
swth	2006	134	135.636	6.35	6.223	10.6667	26.6667	-0.555556	14	33.8889	1.11111	0.66	0.05	0.4	0.48	0.1	1.8	1.1	-0.521	-0.571	0.045	5.3086	13.4366	8.3058	6.223	14	33.8889	1.11111	0.44	1.1	0.045	8.3058	5.88889	8.94444	2.83333	4.61111	9.83333	-0.666667	3.22222	6.27778	0.166667	5	18	18	4.57407	8.35185	0.777778	41	5
swth	2007	131	95.6056	5.08	4.0894	9.72222	25	-1.11111	12.8889	30	1.11111	0.04	-0.36	0.16	-0.1	-0.1	0.2	-0.1	0.125	0.026	0.348	11.2776	0.889	3.4036	4.0894	12.8889	30	1.11111	0.03	-0.1	0.348	3.4036	2.44444	6.33333	-1.5	5.94444	9.83333	2	3.5	6.72222	0.277778	24	10	20	3.96296	7.62963	0.259259	54	5.88889
swth	2008	128	86.4616	6.0452	0.9652	8.05556	26.6667	-1.66667	13.3889	34.4444	0.555556	-0.77	-0.71	-1.52	-1.37	2.6	1.4	0.7	-1.552	-0.858	-0.345	4.5974	0.127	0	0.9652	13.3889	34.4444	0.555556	-1.445	0.7	-0.345	0	1.83333	5.22222	-1.66667	5.11111	10.3889	-0.166667	4	7.38889	0.611111	24	21	17	3.64815	7.66667	-0.407407	62	2.44444
swth	2009	135	89.2556	3.2766	9.271	9.27778	26.6667	-2.22222	13.2222	30.5556	1.66667	-1.55	-1.59	-1.65	-0.88	1.9	0.4	0.8	-0.705	-0.106	0.326	12.8778	5.3086	3.7084	9.271	13.2222	30.5556	1.66667	-1.265	0.8	0.326	3.7084	2.38889	7.44444	-2.66667	3.55556	9.55556	-2.44444	1.55556	6.44444	-3.33333	24	24	26	2.5	7.81481	-2.81481	74	1.83333
swth	2010	137	130.785	11.1252	8.382	9.38889	22.2222	-1.66667	11.6667	24.4444	0	0.82	0.44	0.78	0.62	-1.5	-0.7	1.2	1.462	0.978	0.658	5.8166	7.5692	6.731	8.382	11.6667	24.4444	0	0.7	1.2	0.658	6.731	4.55556	10.2222	-1.16667	4.77778	11.6111	-2	-0.444444	5.55556	-6.44444	27	20	25	2.96296	9.12963	-3.2037	72	2.38889
swth	2011	134	93.98	10.3124	9.0678	8.22222	20	-1.66667	11.5556	23.8889	0	-0.83	-0.69	-0.42	-0.37	2.7	2.5	1.9	-1.554	-1.387	-0.199	8.6106	17.653	0.1524	9.0678	11.5556	23.8889	0	-0.395	1.9	-0.199	0.1524	4.66667	8.16667	1.11111	4.27778	9.16667	-0.666667	5.33333	8.66667	2.05556	14	18	8	4.75926	8.66667	0.833333	40	4.55556
swth	2012	138	149.301	11.4808	7.0866	10.8889	26.6667	0	12.6667	28.8889	0.555556	-0.85	-1.05	-0.27	-1.26	0.5	0.7	-0.3	-0.382	0.11	0.757	2.3368	10.3124	6.1468	7.0866	12.6667	28.8889	0.555556	-0.765	-0.3	0.757	6.1468	3.77778	8.16667	-0.555556	5.05556	10.2222	-0.111111	2.38889	6.77778	-1.94444	19	18	26	3.74074	8.38889	-0.87037	63	4.66667
swth	2013	130	64.3128	5.0546	6.2484	10.9444	25.5556	-1.11111	14.3889	29.4444	3.33333	-0.43	-0.63	-0.16	0.08	-0.2	1.5	0.2	-0.026	0.09	0.205	0.9144	3.5052	1.7526	6.2484	14.3889	29.4444	3.33333	-0.04	0.2	0.205	1.7526	1.11111	5	-2.83333	4.38889	9.44444	-0.722222	4.16667	7.94444	0.333333	26	20	16	3.22222	7.46296	-1.07407	62	3.77778
swth	2014	133	116.738	7.6708	6.6548	10.7222	24.4444	0.555556	14.6667	31.1111	1.11111	0.38	0.97	1.13	1.8	0.1	-0.9	0.8	0.018	0.295	1.001	10.5156	4.4958	4.6482	6.6548	14.6667	31.1111	1.11111	1.465	0.8	1.001	4.6482	2.83333	7.88889	-2.27778	3.38889	8.66667	-1.83333	0.0555556	5.05556	-5	25	21	27	2.09259	7.2037	-3.03704	73	1.11111
vgsw	1985	88	68.961	2.667	2.3876	11.1667	25.5556	0	12.7778	28.8889	-2.22222	0.94	0.57	0.19	0	1.2	0.8	1.2	-0.696	-0.468	-0.706	3.8608	5.1054	0	2.667	11.1667	25.5556	0	0.755	1	-0.582	4.4831	1.22222	5.55556	-3.05556	3.5	8.22222	-1.22222	2	5.66667	-1.66667	30	22	25	2.24074	6.48148	-1.98148	77	4.66667
vgsw	1986	60	111.125	4.6736	6.35	9.55556	26.1111	-1.11111	12.8333	31.6667	1.66667	1.61	2.18	1.55	1.16	-1	0.5	0.3	0.028	-0.107	0.353	21.844	8.128	2.3114	4.6736	9.55556	26.1111	-1.11111	1.895	-0.25	-0.0395	14.986	4.72222	8.33333	1.11111	5.72222	9.22222	2.27778	-0.222222	3.72222	-4.16667	16	10	27	3.40741	7.09259	-0.259259	53	1.22222
vgsw	1987	69	95.7834	3.9624	3.556	11.5556	28.3333	-0.555556	14.5556	33.3333	1.11111	1.75	2.1	2.16	1.85	-1.3	-1.4	-1.3	1.716	1.855	2.107	8.2042	7.747	0.508	3.9624	11.5556	28.3333	-0.555556	1.925	-1.35	1.7855	7.9756	3	6.72222	-0.722222	5.66667	10	1.27778	2.66667	6	-0.722222	17	10	21	3.77778	7.57407	-0.0555556	48	4.72222
vgsw	1988	70	95.3008	8.4582	9.7536	10.8333	25.5556	-0.555556	12.2222	30	1.66667	1.24	1.42	0.94	1.2	-0.4	0.6	0.1	0.495	0.389	0.193	2.5146	0.4318	4.0132	8.4582	10.8333	25.5556	-0.555556	1.33	0.1	0.442	1.4732	2.77778	5.83333	-0.222222	5.33333	10.0556	0.666667	2.72222	5.22222	0.166667	21	15	20	3.61111	7.03704	0.203704	56	3
vgsw	1989	101	75.2856	3.6068	3.7084	12.6667	26.6667	1.11111	13	26.6667	1.66667	-1.02	-0.83	-0.32	0.47	1.2	1.1	1.6	-1.035	-0.76	-0.393	3.175	15.9766	0.7874	3.6068	12.6667	26.6667	1.11111	-0.925	1.15	-0.8975	9.5758	3.94444	7.38889	0.555556	0.666667	5	-3.72222	3.38889	6.66667	0.111111	18	21	18	2.66667	6.35185	-1.01852	57	2.77778
vgsw	1996	93	185.953	12.5222	10.1092	11.1667	26.1111	1.66667	11.8333	26.1111	-1.11111	0.75	1.01	1.46	2.18	0.3	1.1	0.8	-0.236	-0.391	-0.041	13.9446	4.3942	3.175	12.5222	11.1667	26.1111	1.66667	0.88	0.7	-0.3135	9.1694	4.83333	7.72222	2	4.66667	8.72222	0.555556	4.83333	7.72222	1.94444	10	15	9	4.77778	8.05556	1.5	34	5.77778
vgsw	1997	95	113.411	9.144	5.588	10.0556	23.3333	-0.555556	15.5556	31.6667	2.22222	0.28	0.65	1.05	1.83	1.7	-0.4	-0.6	-0.248	0.527	1.132	0.7112	0.8636	0.4572	9.144	10.0556	23.3333	-0.555556	0.465	0.65	0.1395	0.7874	3.88889	7.38889	0.333333	4.83333	9.61111	0.111111	4.5	7.83333	1.11111	16	15	13	4.40741	8.27778	0.518519	44	4.83333
vgsw	1998	92	152.425	4.6482	14.732	9.83333	28.3333	-0.555556	12.4444	27.7778	2.22222	1.56	2.01	1.27	0.7	-2	-2.4	-1.4	2.751	2.658	2.206	25.273	6.2738	2.667	4.6482	9.83333	28.3333	-0.555556	1.785	-2.2	2.7045	15.7734	5.61111	8.77778	2.44444	6.11111	10.0556	2.16667	3.27778	6.88889	-0.388889	7	7	22	5	8.57407	1.40741	36	3.88889
vgsw	1999	103	126.492	2.7178	5.0546	9.5	27.2222	-1.11111	11.5556	30.5556	1.11111	-0.66	-0.33	-0.41	-0.68	1	1.3	1.4	-0.95	-0.88	-0.596	11.303	3.81	2.2606	2.7178	9.5	27.2222	-1.11111	-0.495	1.15	-0.915	7.5565	5.05556	7.72222	2.38889	5.11111	8.38889	1.88889	3.55556	6.55556	0.5	8	8	14	4.57407	7.55556	1.59259	30	5.61111
vgsw	2000	79	88.6968	4.1402	7.5946	10.8889	25	-2.22222	13.2778	26.6667	1.11111	-0.83	0.29	0.35	-0.05	1.7	1.3	1.2	-1.09	-0.397	0.251	21.5646	5.1562	3.5306	4.1402	10.8889	25	-2.22222	-0.27	1.5	-0.7435	13.3604	3.33333	6.33333	0.277778	5.55556	9.5	1.61111	4.83333	8.22222	1.44444	18	13	11	4.57407	8.01852	1.11111	42	5.05556
vgsw	2001	106	85.217	5.9182	2.8194	8.66667	26.1111	-2.22222	13.6111	33.8889	0	0.29	0.45	-0.31	-0.3	1.7	0.9	0.2	-0.548	-0.05	0.282	11.6078	5.1816	3.81	5.9182	8.66667	26.1111	-2.22222	0.37	1.3	-0.299	8.3947	4.05556	7.83333	0.222222	4.83333	9.88889	-0.222222	3.88889	7.16667	0.666667	17	17	16	4.25926	8.2963	0.222222	50	3.33333
vgsw	2002	120	110.414	4.699	4.445	10.3333	23.3333	-0.555556	12	27.7778	-0.555556	-0.64	-0.43	-0.32	-0.63	1.1	-0.2	-0.1	-0.118	0.401	0.886	2.8702	7.2898	0.3048	4.699	10.3333	23.3333	-0.555556	-0.535	0.45	0.1415	5.08	4.66667	7.33333	2	5.77778	10.6111	0.944444	4.55556	7.22222	1.88889	12	17	4	5	8.38889	1.61111	33	4.05556
vgsw	2003	94	119.05	16.4592	3.3782	9.66667	20.5556	1.11111	13	28.8889	0	1.75	1.51	1.18	0.89	-0.7	-0.3	-0.1	0.83	0.413	0.214	3.2766	4.7498	6.4262	16.4592	9.66667	20.5556	1.11111	1.63	-0.5	0.6215	4.0132	6.72222	10.2222	3.16667	5.88889	10.8889	0.888889	5.33333	8.22222	2.44444	12	16	6	5.98148	9.77778	2.16667	34	4.66667
vgsw	2004	79	104.14	7.62	3.302	10.1667	25.2657	-0.676328	13.9444	28.8889	2.22222	0.48	0.61	0.57	0.88	1.2	0.4	-0.9	-0.306	0.358	0.558	12.7254	1.2192	0.2286	7.62	10.1667	25.2657	-0.676328	0.545	0.8	0.026	6.9723	3.88889	6.72222	1.11111	5.88889	9.83333	2	5.05556	7.77778	2.27778	13	7	8	4.94444	8.11111	1.7963	28	6.72222
vgsw	2005	65	99.3648	6.6802	10.7696	10.0556	25	-0.555556	14.2222	32.2222	3.33333	0.81	1.36	1.03	1.86	-3.1	0.3	-0.6	1.057	0.626	0.885	5.9182	8.382	2.1336	6.6802	10.0556	25	-0.555556	1.085	-1.4	0.8415	7.1501	5	8.55556	1.44444	5.22222	10.5556	-0.0555556	5.44444	8.44444	2.5	13	17	5	5.22222	9.18519	1.2963	35	3.88889
vgsw	2006	86	135.636	6.35	6.223	10.6667	26.6667	-0.555556	14	33.8889	1.11111	0.66	0.05	0.4	0.48	0.1	1.8	1.1	-0.521	-0.571	0.045	5.3086	13.4366	8.3058	6.35	10.6667	26.6667	-0.555556	0.355	0.95	-0.546	9.3726	5.88889	8.94444	2.83333	4.61111	9.83333	-0.666667	3.22222	6.27778	0.166667	5	18	18	4.57407	8.35185	0.777778	41	5
vgsw	2007	74	95.6056	5.08	4.0894	9.72222	25	-1.11111	12.8889	30	1.11111	0.04	-0.36	0.16	-0.1	-0.1	0.2	-0.1	0.125	0.026	0.348	11.2776	0.889	3.4036	5.08	9.72222	25	-1.11111	-0.16	0.05	0.0755	6.0833	2.44444	6.33333	-1.5	5.94444	9.83333	2	3.5	6.72222	0.277778	24	10	20	3.96296	7.62963	0.259259	54	5.88889
vgsw	2008	66	86.4616	6.0452	0.9652	8.05556	26.6667	-1.66667	13.3889	34.4444	0.555556	-0.77	-0.71	-1.52	-1.37	2.6	1.4	0.7	-1.552	-0.858	-0.345	4.5974	0.127	0	6.0452	8.05556	26.6667	-1.66667	-0.74	2	-1.205	2.3622	1.83333	5.22222	-1.66667	5.11111	10.3889	-0.166667	4	7.38889	0.611111	24	21	17	3.64815	7.66667	-0.407407	62	2.44444
vgsw	2009	72	89.2556	3.2766	9.271	9.27778	26.6667	-2.22222	13.2222	30.5556	1.66667	-1.55	-1.59	-1.65	-0.88	1.9	0.4	0.8	-0.705	-0.106	0.326	12.8778	5.3086	3.7084	3.2766	9.27778	26.6667	-2.22222	-1.57	1.15	-0.4055	9.0932	2.38889	7.44444	-2.66667	3.55556	9.55556	-2.44444	1.55556	6.44444	-3.33333	24	24	26	2.5	7.81481	-2.81481	74	1.83333
vgsw	2010	76	130.785	11.1252	8.382	9.38889	22.2222	-1.66667	11.6667	24.4444	0	0.82	0.44	0.78	0.62	-1.5	-0.7	1.2	1.462	0.978	0.658	5.8166	7.5692	6.731	11.1252	9.38889	22.2222	-1.66667	0.63	-1.1	1.22	6.6929	4.55556	10.2222	-1.16667	4.77778	11.6111	-2	-0.444444	5.55556	-6.44444	27	20	25	2.96296	9.12963	-3.2037	72	2.38889
vgsw	2011	82	93.98	10.3124	9.0678	8.22222	20	-1.66667	11.5556	23.8889	0	-0.83	-0.69	-0.42	-0.37	2.7	2.5	1.9	-1.554	-1.387	-0.199	8.6106	17.653	0.1524	10.3124	8.22222	20	-1.66667	-0.76	2.6	-1.4705	13.1318	4.66667	8.16667	1.11111	4.27778	9.16667	-0.666667	5.33333	8.66667	2.05556	14	18	8	4.75926	8.66667	0.833333	40	4.55556
vgsw	2012	96	149.301	11.4808	7.0866	10.8889	26.6667	0	12.6667	28.8889	0.555556	-0.85	-1.05	-0.27	-1.26	0.5	0.7	-0.3	-0.382	0.11	0.757	2.3368	10.3124	6.1468	11.4808	10.8889	26.6667	0	-0.95	0.6	-0.136	6.3246	3.77778	8.16667	-0.555556	5.05556	10.2222	-0.111111	2.38889	6.77778	-1.94444	19	18	26	3.74074	8.38889	-0.87037	63	4.66667
vgsw	2013	77	64.3128	5.0546	6.2484	10.9444	25.5556	-1.11111	14.3889	29.4444	3.33333	-0.43	-0.63	-0.16	0.08	-0.2	1.5	0.2	-0.026	0.09	0.205	0.9144	3.5052	1.7526	5.0546	10.9444	25.5556	-1.11111	-0.53	0.65	0.032	2.2098	1.11111	5	-2.83333	4.38889	9.44444	-0.722222	4.16667	7.94444	0.333333	26	20	16	3.22222	7.46296	-1.07407	62	3.77778
vgsw	2014	56	116.738	7.6708	6.6548	10.7222	24.4444	0.555556	14.6667	31.1111	1.11111	0.38	0.97	1.13	1.8	0.1	-0.9	0.8	0.018	0.295	1.001	10.5156	4.4958	4.6482	7.6708	10.7222	24.4444	0.555556	0.675	-0.4	0.1565	7.5057	2.83333	7.88889	-2.27778	3.38889	8.66667	-1.83333	0.0555556	5.05556	-5	25	21	27	2.09259	7.2037	-3.03704	73	1.11111
wavi	1985	136	68.961	2.667	2.3876	11.1667	25.5556	0	12.7778	28.8889	-2.22222	0.94	0.57	0.19	0	1.2	0.8	1.2	-0.696	-0.468	-0.706	3.8608	5.1054	0	2.3876	12.7778	28.8889	-2.22222	0.19	1.2	-0.706	0	1.22222	5.55556	-3.05556	3.5	8.22222	-1.22222	2	5.66667	-1.66667	30	22	25	2.24074	6.48148	-1.98148	77	4.66667
wavi	1986	146	111.125	4.6736	6.35	9.55556	26.1111	-1.11111	12.8333	31.6667	1.66667	1.61	2.18	1.55	1.16	-1	0.5	0.3	0.028	-0.107	0.353	21.844	8.128	2.3114	6.35	12.8333	31.6667	1.66667	1.55	0.3	0.353	2.3114	4.72222	8.33333	1.11111	5.72222	9.22222	2.27778	-0.222222	3.72222	-4.16667	16	10	27	3.40741	7.09259	-0.259259	53	1.22222
wavi	1987	132	95.7834	3.9624	3.556	11.5556	28.3333	-0.555556	14.5556	33.3333	1.11111	1.75	2.1	2.16	1.85	-1.3	-1.4	-1.3	1.716	1.855	2.107	8.2042	7.747	0.508	3.556	14.5556	33.3333	1.11111	2.16	-1.3	2.107	0.508	3	6.72222	-0.722222	5.66667	10	1.27778	2.66667	6	-0.722222	17	10	21	3.77778	7.57407	-0.0555556	48	4.72222
wavi	1988	143	95.3008	8.4582	9.7536	10.8333	25.5556	-0.555556	12.2222	30	1.66667	1.24	1.42	0.94	1.2	-0.4	0.6	0.1	0.495	0.389	0.193	2.5146	0.4318	4.0132	9.7536	12.2222	30	1.66667	0.94	0.1	0.193	4.0132	2.77778	5.83333	-0.222222	5.33333	10.0556	0.666667	2.72222	5.22222	0.166667	21	15	20	3.61111	7.03704	0.203704	56	3
wavi	1989	145	75.2856	3.6068	3.7084	12.6667	26.6667	1.11111	13	26.6667	1.66667	-1.02	-0.83	-0.32	0.47	1.2	1.1	1.6	-1.035	-0.76	-0.393	3.175	15.9766	0.7874	3.7084	13	26.6667	1.66667	-0.32	1.6	-0.393	0.7874	3.94444	7.38889	0.555556	0.666667	5	-3.72222	3.38889	6.66667	0.111111	18	21	18	2.66667	6.35185	-1.01852	57	2.77778
wavi	1996	143	185.953	12.5222	10.1092	11.1667	26.1111	1.66667	11.8333	26.1111	-1.11111	0.75	1.01	1.46	2.18	0.3	1.1	0.8	-0.236	-0.391	-0.041	13.9446	4.3942	3.175	10.1092	11.8333	26.1111	-1.11111	1.46	0.8	-0.041	3.175	4.83333	7.72222	2	4.66667	8.72222	0.555556	4.83333	7.72222	1.94444	10	15	9	4.77778	8.05556	1.5	34	5.77778
wavi	1997	130	113.411	9.144	5.588	10.0556	23.3333	-0.555556	15.5556	31.6667	2.22222	0.28	0.65	1.05	1.83	1.7	-0.4	-0.6	-0.248	0.527	1.132	0.7112	0.8636	0.4572	5.588	15.5556	31.6667	2.22222	1.05	-0.6	1.132	0.4572	3.88889	7.38889	0.333333	4.83333	9.61111	0.111111	4.5	7.83333	1.11111	16	15	13	4.40741	8.27778	0.518519	44	4.83333
wavi	1998	118	152.425	4.6482	14.732	9.83333	28.3333	-0.555556	12.4444	27.7778	2.22222	1.56	2.01	1.27	0.7	-2	-2.4	-1.4	2.751	2.658	2.206	25.273	6.2738	2.667	14.732	12.4444	27.7778	2.22222	1.27	-1.4	2.206	2.667	5.61111	8.77778	2.44444	6.11111	10.0556	2.16667	3.27778	6.88889	-0.388889	7	7	22	5	8.57407	1.40741	36	3.88889
wavi	1999	136	126.492	2.7178	5.0546	9.5	27.2222	-1.11111	11.5556	30.5556	1.11111	-0.66	-0.33	-0.41	-0.68	1	1.3	1.4	-0.95	-0.88	-0.596	11.303	3.81	2.2606	5.0546	11.5556	30.5556	1.11111	-0.41	1.4	-0.596	2.2606	5.05556	7.72222	2.38889	5.11111	8.38889	1.88889	3.55556	6.55556	0.5	8	8	14	4.57407	7.55556	1.59259	30	5.61111
wavi	2000	134	88.6968	4.1402	7.5946	10.8889	25	-2.22222	13.2778	26.6667	1.11111	-0.83	0.29	0.35	-0.05	1.7	1.3	1.2	-1.09	-0.397	0.251	21.5646	5.1562	3.5306	7.5946	13.2778	26.6667	1.11111	0.35	1.2	0.251	3.5306	3.33333	6.33333	0.277778	5.55556	9.5	1.61111	4.83333	8.22222	1.44444	18	13	11	4.57407	8.01852	1.11111	42	5.05556
wavi	2001	127	85.217	5.9182	2.8194	8.66667	26.1111	-2.22222	13.6111	33.8889	0	0.29	0.45	-0.31	-0.3	1.7	0.9	0.2	-0.548	-0.05	0.282	11.6078	5.1816	3.81	2.8194	13.6111	33.8889	0	-0.31	0.2	0.282	3.81	4.05556	7.83333	0.222222	4.83333	9.88889	-0.222222	3.88889	7.16667	0.666667	17	17	16	4.25926	8.2963	0.222222	50	3.33333
wavi	2002	131	110.414	4.699	4.445	10.3333	23.3333	-0.555556	12	27.7778	-0.555556	-0.64	-0.43	-0.32	-0.63	1.1	-0.2	-0.1	-0.118	0.401	0.886	2.8702	7.2898	0.3048	4.445	12	27.7778	-0.555556	-0.32	-0.1	0.886	0.3048	4.66667	7.33333	2	5.77778	10.6111	0.944444	4.55556	7.22222	1.88889	12	17	4	5	8.38889	1.61111	33	4.05556
wavi	2003	137	119.05	16.4592	3.3782	9.66667	20.5556	1.11111	13	28.8889	0	1.75	1.51	1.18	0.89	-0.7	-0.3	-0.1	0.83	0.413	0.214	3.2766	4.7498	6.4262	3.3782	13	28.8889	0	1.18	-0.1	0.214	6.4262	6.72222	10.2222	3.16667	5.88889	10.8889	0.888889	5.33333	8.22222	2.44444	12	16	6	5.98148	9.77778	2.16667	34	4.66667
wavi	2004	120	104.14	7.62	3.302	10.1667	25.2657	-0.676328	13.9444	28.8889	2.22222	0.48	0.61	0.57	0.88	1.2	0.4	-0.9	-0.306	0.358	0.558	12.7254	1.2192	0.2286	3.302	13.9444	28.8889	2.22222	0.57	-0.9	0.558	0.2286	3.88889	6.72222	1.11111	5.88889	9.83333	2	5.05556	7.77778	2.27778	13	7	8	4.94444	8.11111	1.7963	28	6.72222
wavi	2005	118	99.3648	6.6802	10.7696	10.0556	25	-0.555556	14.2222	32.2222	3.33333	0.81	1.36	1.03	1.86	-3.1	0.3	-0.6	1.057	0.626	0.885	5.9182	8.382	2.1336	10.7696	14.2222	32.2222	3.33333	1.03	-0.6	0.885	2.1336	5	8.55556	1.44444	5.22222	10.5556	-0.0555556	5.44444	8.44444	2.5	13	17	5	5.22222	9.18519	1.2963	35	3.88889
wavi	2006	118	135.636	6.35	6.223	10.6667	26.6667	-0.555556	14	33.8889	1.11111	0.66	0.05	0.4	0.48	0.1	1.8	1.1	-0.521	-0.571	0.045	5.3086	13.4366	8.3058	6.223	14	33.8889	1.11111	0.4	1.1	0.045	8.3058	5.88889	8.94444	2.83333	4.61111	9.83333	-0.666667	3.22222	6.27778	0.166667	5	18	18	4.57407	8.35185	0.777778	41	5
wavi	2007	126	95.6056	5.08	4.0894	9.72222	25	-1.11111	12.8889	30	1.11111	0.04	-0.36	0.16	-0.1	-0.1	0.2	-0.1	0.125	0.026	0.348	11.2776	0.889	3.4036	4.0894	12.8889	30	1.11111	0.16	-0.1	0.348	3.4036	2.44444	6.33333	-1.5	5.94444	9.83333	2	3.5	6.72222	0.277778	24	10	20	3.96296	7.62963	0.259259	54	5.88889
wavi	2008	124	86.4616	6.0452	0.9652	8.05556	26.6667	-1.66667	13.3889	34.4444	0.555556	-0.77	-0.71	-1.52	-1.37	2.6	1.4	0.7	-1.552	-0.858	-0.345	4.5974	0.127	0	0.9652	13.3889	34.4444	0.555556	-1.52	0.7	-0.345	0	1.83333	5.22222	-1.66667	5.11111	10.3889	-0.166667	4	7.38889	0.611111	24	21	17	3.64815	7.66667	-0.407407	62	2.44444
wavi	2009	137	89.2556	3.2766	9.271	9.27778	26.6667	-2.22222	13.2222	30.5556	1.66667	-1.55	-1.59	-1.65	-0.88	1.9	0.4	0.8	-0.705	-0.106	0.326	12.8778	5.3086	3.7084	9.271	13.2222	30.5556	1.66667	-1.65	0.8	0.326	3.7084	2.38889	7.44444	-2.66667	3.55556	9.55556	-2.44444	1.55556	6.44444	-3.33333	24	24	26	2.5	7.81481	-2.81481	74	1.83333
wavi	2010	129	130.785	11.1252	8.382	9.38889	22.2222	-1.66667	11.6667	24.4444	0	0.82	0.44	0.78	0.62	-1.5	-0.7	1.2	1.462	0.978	0.658	5.8166	7.5692	6.731	8.382	11.6667	24.4444	0	0.78	1.2	0.658	6.731	4.55556	10.2222	-1.16667	4.77778	11.6111	-2	-0.444444	5.55556	-6.44444	27	20	25	2.96296	9.12963	-3.2037	72	2.38889
wavi	2011	132	93.98	10.3124	9.0678	8.22222	20	-1.66667	11.5556	23.8889	0	-0.83	-0.69	-0.42	-0.37	2.7	2.5	1.9	-1.554	-1.387	-0.199	8.6106	17.653	0.1524	9.0678	11.5556	23.8889	0	-0.42	1.9	-0.199	0.1524	4.66667	8.16667	1.11111	4.27778	9.16667	-0.666667	5.33333	8.66667	2.05556	14	18	8	4.75926	8.66667	0.833333	40	4.55556
wavi	2012	126	149.301	11.4808	7.0866	10.8889	26.6667	0	12.6667	28.8889	0.555556	-0.85	-1.05	-0.27	-1.26	0.5	0.7	-0.3	-0.382	0.11	0.757	2.3368	10.3124	6.1468	7.0866	12.6667	28.8889	0.555556	-0.27	-0.3	0.757	6.1468	3.77778	8.16667	-0.555556	5.05556	10.2222	-0.111111	2.38889	6.77778	-1.94444	19	18	26	3.74074	8.38889	-0.87037	63	4.66667
wavi	2013	130	64.3128	5.0546	6.2484	10.9444	25.5556	-1.11111	14.3889	29.4444	3.33333	-0.43	-0.63	-0.16	0.08	-0.2	1.5	0.2	-0.026	0.09	0.205	0.9144	3.5052	1.7526	6.2484	14.3889	29.4444	3.33333	-0.16	0.2	0.205	1.7526	1.11111	5	-2.83333	4.38889	9.44444	-0.722222	4.16667	7.94444	0.333333	26	20	16	3.22222	7.46296	-1.07407	62	3.77778
wavi	2014	122	116.738	7.6708	6.6548	10.7222	24.4444	0.555556	14.6667	31.1111	1.11111	0.38	0.97	1.13	1.8	0.1	-0.9	0.8	0.018	0.295	1.001	10.5156	4.4958	4.6482	6.6548	14.6667	31.1111	1.11111	1.13	0.8	1.001	4.6482	2.83333	7.88889	-2.27778	3.38889	8.66667	-1.83333	0.0555556	5.05556	-5	25	21	27	2.09259	7.2037	-3.03704	73	1.11111
weta	1985	136	68.961	2.667	2.3876	11.1667	25.5556	0	12.7778	28.8889	-2.22222	0.94	0.57	0.19	0	1.2	0.8	1.2	-0.696	-0.468	-0.706	3.8608	5.1054	0	2.3876	12.7778	28.8889	-2.22222	0.19	1.2	-0.706	0	1.22222	5.55556	-3.05556	3.5	8.22222	-1.22222	2	5.66667	-1.66667	30	22	25	2.24074	6.48148	-1.98148	77	4.66667
weta	1986	139	111.125	4.6736	6.35	9.55556	26.1111	-1.11111	12.8333	31.6667	1.66667	1.61	2.18	1.55	1.16	-1	0.5	0.3	0.028	-0.107	0.353	21.844	8.128	2.3114	6.35	12.8333	31.6667	1.66667	1.55	0.3	0.353	2.3114	4.72222	8.33333	1.11111	5.72222	9.22222	2.27778	-0.222222	3.72222	-4.16667	16	10	27	3.40741	7.09259	-0.259259	53	1.22222
weta	1987	122	95.7834	3.9624	3.556	11.5556	28.3333	-0.555556	14.5556	33.3333	1.11111	1.75	2.1	2.16	1.85	-1.3	-1.4	-1.3	1.716	1.855	2.107	8.2042	7.747	0.508	3.556	14.5556	33.3333	1.11111	2.16	-1.3	2.107	0.508	3	6.72222	-0.722222	5.66667	10	1.27778	2.66667	6	-0.722222	17	10	21	3.77778	7.57407	-0.0555556	48	4.72222
weta	1988	132	95.3008	8.4582	9.7536	10.8333	25.5556	-0.555556	12.2222	30	1.66667	1.24	1.42	0.94	1.2	-0.4	0.6	0.1	0.495	0.389	0.193	2.5146	0.4318	4.0132	9.7536	12.2222	30	1.66667	0.94	0.1	0.193	4.0132	2.77778	5.83333	-0.222222	5.33333	10.0556	0.666667	2.72222	5.22222	0.166667	21	15	20	3.61111	7.03704	0.203704	56	3
weta	1989	132	75.2856	3.6068	3.7084	12.6667	26.6667	1.11111	13	26.6667	1.66667	-1.02	-0.83	-0.32	0.47	1.2	1.1	1.6	-1.035	-0.76	-0.393	3.175	15.9766	0.7874	3.7084	13	26.6667	1.66667	-0.32	1.6	-0.393	0.7874	3.94444	7.38889	0.555556	0.666667	5	-3.72222	3.38889	6.66667	0.111111	18	21	18	2.66667	6.35185	-1.01852	57	2.77778
weta	1996	129	185.953	12.5222	10.1092	11.1667	26.1111	1.66667	11.8333	26.1111	-1.11111	0.75	1.01	1.46	2.18	0.3	1.1	0.8	-0.236	-0.391	-0.041	13.9446	4.3942	3.175	10.1092	11.8333	26.1111	-1.11111	1.46	0.8	-0.041	3.175	4.83333	7.72222	2	4.66667	8.72222	0.555556	4.83333	7.72222	1.94444	10	15	9	4.77778	8.05556	1.5	34	5.77778
weta	1997	125	113.411	9.144	5.588	10.0556	23.3333	-0.555556	15.5556	31.6667	2.22222	0.28	0.65	1.05	1.83	1.7	-0.4	-0.6	-0.248	0.527	1.132	0.7112	0.8636	0.4572	5.588	15.5556	31.6667	2.22222	1.05	-0.6	1.132	0.4572	3.88889	7.38889	0.333333	4.83333	9.61111	0.111111	4.5	7.83333	1.11111	16	15	13	4.40741	8.27778	0.518519	44	4.83333
weta	1998	118	152.425	4.6482	14.732	9.83333	28.3333	-0.555556	12.4444	27.7778	2.22222	1.56	2.01	1.27	0.7	-2	-2.4	-1.4	2.751	2.658	2.206	25.273	6.2738	2.667	14.732	12.4444	27.7778	2.22222	1.27	-1.4	2.206	2.667	5.61111	8.77778	2.44444	6.11111	10.0556	2.16667	3.27778	6.88889	-0.388889	7	7	22	5	8.57407	1.40741	36	3.88889
weta	1999	128	126.492	2.7178	5.0546	9.5	27.2222	-1.11111	11.5556	30.5556	1.11111	-0.66	-0.33	-0.41	-0.68	1	1.3	1.4	-0.95	-0.88	-0.596	11.303	3.81	2.2606	5.0546	11.5556	30.5556	1.11111	-0.41	1.4	-0.596	2.2606	5.05556	7.72222	2.38889	5.11111	8.38889	1.88889	3.55556	6.55556	0.5	8	8	14	4.57407	7.55556	1.59259	30	5.61111
weta	2000	125	88.6968	4.1402	7.5946	10.8889	25	-2.22222	13.2778	26.6667	1.11111	-0.83	0.29	0.35	-0.05	1.7	1.3	1.2	-1.09	-0.397	0.251	21.5646	5.1562	3.5306	7.5946	13.2778	26.6667	1.11111	0.35	1.2	0.251	3.5306	3.33333	6.33333	0.277778	5.55556	9.5	1.61111	4.83333	8.22222	1.44444	18	13	11	4.57407	8.01852	1.11111	42	5.05556
weta	2001	123	85.217	5.9182	2.8194	8.66667	26.1111	-2.22222	13.6111	33.8889	0	0.29	0.45	-0.31	-0.3	1.7	0.9	0.2	-0.548	-0.05	0.282	11.6078	5.1816	3.81	2.8194	13.6111	33.8889	0	-0.31	0.2	0.282	3.81	4.05556	7.83333	0.222222	4.83333	9.88889	-0.222222	3.88889	7.16667	0.666667	17	17	16	4.25926	8.2963	0.222222	50	3.33333
weta	2002	131	110.414	4.699	4.445	10.3333	23.3333	-0.555556	12	27.7778	-0.555556	-0.64	-0.43	-0.32	-0.63	1.1	-0.2	-0.1	-0.118	0.401	0.886	2.8702	7.2898	0.3048	4.445	12	27.7778	-0.555556	-0.32	-0.1	0.886	0.3048	4.66667	7.33333	2	5.77778	10.6111	0.944444	4.55556	7.22222	1.88889	12	17	4	5	8.38889	1.61111	33	4.05556
weta	2003	133	119.05	16.4592	3.3782	9.66667	20.5556	1.11111	13	28.8889	0	1.75	1.51	1.18	0.89	-0.7	-0.3	-0.1	0.83	0.413	0.214	3.2766	4.7498	6.4262	3.3782	13	28.8889	0	1.18	-0.1	0.214	6.4262	6.72222	10.2222	3.16667	5.88889	10.8889	0.888889	5.33333	8.22222	2.44444	12	16	6	5.98148	9.77778	2.16667	34	4.66667
weta	2004	121	104.14	7.62	3.302	10.1667	25.2657	-0.676328	13.9444	28.8889	2.22222	0.48	0.61	0.57	0.88	1.2	0.4	-0.9	-0.306	0.358	0.558	12.7254	1.2192	0.2286	3.302	13.9444	28.8889	2.22222	0.57	-0.9	0.558	0.2286	3.88889	6.72222	1.11111	5.88889	9.83333	2	5.05556	7.77778	2.27778	13	7	8	4.94444	8.11111	1.7963	28	6.72222
weta	2005	117	99.3648	6.6802	10.7696	10.0556	25	-0.555556	14.2222	32.2222	3.33333	0.81	1.36	1.03	1.86	-3.1	0.3	-0.6	1.057	0.626	0.885	5.9182	8.382	2.1336	10.7696	14.2222	32.2222	3.33333	1.03	-0.6	0.885	2.1336	5	8.55556	1.44444	5.22222	10.5556	-0.0555556	5.44444	8.44444	2.5	13	17	5	5.22222	9.18519	1.2963	35	3.88889
weta	2006	123	135.636	6.35	6.223	10.6667	26.6667	-0.555556	14	33.8889	1.11111	0.66	0.05	0.4	0.48	0.1	1.8	1.1	-0.521	-0.571	0.045	5.3086	13.4366	8.3058	6.223	14	33.8889	1.11111	0.4	1.1	0.045	8.3058	5.88889	8.94444	2.83333	4.61111	9.83333	-0.666667	3.22222	6.27778	0.166667	5	18	18	4.57407	8.35185	0.777778	41	5
weta	2007	118	95.6056	5.08	4.0894	9.72222	25	-1.11111	12.8889	30	1.11111	0.04	-0.36	0.16	-0.1	-0.1	0.2	-0.1	0.125	0.026	0.348	11.2776	0.889	3.4036	4.0894	12.8889	30	1.11111	0.16	-0.1	0.348	3.4036	2.44444	6.33333	-1.5	5.94444	9.83333	2	3.5	6.72222	0.277778	24	10	20	3.96296	7.62963	0.259259	54	5.88889
weta	2008	109	86.4616	6.0452	0.9652	8.05556	26.6667	-1.66667	13.3889	34.4444	0.555556	-0.77	-0.71	-1.52	-1.37	2.6	1.4	0.7	-1.552	-0.858	-0.345	4.5974	0.127	0	0.9652	13.3889	34.4444	0.555556	-1.52	0.7	-0.345	0	1.83333	5.22222	-1.66667	5.11111	10.3889	-0.166667	4	7.38889	0.611111	24	21	17	3.64815	7.66667	-0.407407	62	2.44444
weta	2009	128	89.2556	3.2766	9.271	9.27778	26.6667	-2.22222	13.2222	30.5556	1.66667	-1.55	-1.59	-1.65	-0.88	1.9	0.4	0.8	-0.705	-0.106	0.326	12.8778	5.3086	3.7084	9.271	13.2222	30.5556	1.66667	-1.65	0.8	0.326	3.7084	2.38889	7.44444	-2.66667	3.55556	9.55556	-2.44444	1.55556	6.44444	-3.33333	24	24	26	2.5	7.81481	-2.81481	74	1.83333
weta	2010	123	130.785	11.1252	8.382	9.38889	22.2222	-1.66667	11.6667	24.4444	0	0.82	0.44	0.78	0.62	-1.5	-0.7	1.2	1.462	0.978	0.658	5.8166	7.5692	6.731	8.382	11.6667	24.4444	0	0.78	1.2	0.658	6.731	4.55556	10.2222	-1.16667	4.77778	11.6111	-2	-0.444444	5.55556	-6.44444	27	20	25	2.96296	9.12963	-3.2037	72	2.38889
weta	2011	132	93.98	10.3124	9.0678	8.22222	20	-1.66667	11.5556	23.8889	0	-0.83	-0.69	-0.42	-0.37	2.7	2.5	1.9	-1.554	-1.387	-0.199	8.6106	17.653	0.1524	9.0678	11.5556	23.8889	0	-0.42	1.9	-0.199	0.1524	4.66667	8.16667	1.11111	4.27778	9.16667	-0.666667	5.33333	8.66667	2.05556	14	18	8	4.75926	8.66667	0.833333	40	4.55556
weta	2012	127	149.301	11.4808	7.0866	10.8889	26.6667	0	12.6667	28.8889	0.555556	-0.85	-1.05	-0.27	-1.26	0.5	0.7	-0.3	-0.382	0.11	0.757	2.3368	10.3124	6.1468	7.0866	12.6667	28.8889	0.555556	-0.27	-0.3	0.757	6.1468	3.77778	8.16667	-0.555556	5.05556	10.2222	-0.111111	2.38889	6.77778	-1.94444	19	18	26	3.74074	8.38889	-0.87037	63	4.66667
weta	2013	122	64.3128	5.0546	6.2484	10.9444	25.5556	-1.11111	14.3889	29.4444	3.33333	-0.43	-0.63	-0.16	0.08	-0.2	1.5	0.2	-0.026	0.09	0.205	0.9144	3.5052	1.7526	6.2484	14.3889	29.4444	3.33333	-0.16	0.2	0.205	1.7526	1.11111	5	-2.83333	4.38889	9.44444	-0.722222	4.16667	7.94444	0.333333	26	20	16	3.22222	7.46296	-1.07407	62	3.77778
weta	2014	121	116.738	7.6708	6.6548	10.7222	24.4444	0.555556	14.6667	31.1111	1.11111	0.38	0.97	1.13	1.8	0.1	-0.9	0.8	0.018	0.295	1.001	10.5156	4.4958	4.6482	6.6548	14.6667	31.1111	1.11111	1.13	0.8	1.001	4.6482	2.83333	7.88889	-2.27778	3.38889	8.66667	-1.83333	0.0555556	5.05556	-5	25	21	27	2.09259	7.2037	-3.03704	73	1.11111
wifl	1985	138	68.961	2.667	2.3876	11.1667	25.5556	0	12.7778	28.8889	-2.22222	0.94	0.57	0.19	0	1.2	0.8	1.2	-0.696	-0.468	-0.706	3.8608	5.1054	0	2.3876	12.7778	28.8889	-2.22222	0.095	1.2	-0.706	0	1.22222	5.55556	-3.05556	3.5	8.22222	-1.22222	2	5.66667	-1.66667	30	22	25	2.24074	6.48148	-1.98148	77	4.66667
wifl	1986	147	111.125	4.6736	6.35	9.55556	26.1111	-1.11111	12.8333	31.6667	1.66667	1.61	2.18	1.55	1.16	-1	0.5	0.3	0.028	-0.107	0.353	21.844	8.128	2.3114	6.35	12.8333	31.6667	1.66667	1.355	0.3	0.353	2.3114	4.72222	8.33333	1.11111	5.72222	9.22222	2.27778	-0.222222	3.72222	-4.16667	16	10	27	3.40741	7.09259	-0.259259	53	1.22222
wifl	1987	142	95.7834	3.9624	3.556	11.5556	28.3333	-0.555556	14.5556	33.3333	1.11111	1.75	2.1	2.16	1.85	-1.3	-1.4	-1.3	1.716	1.855	2.107	8.2042	7.747	0.508	3.556	14.5556	33.3333	1.11111	2.005	-1.3	2.107	0.508	3	6.72222	-0.722222	5.66667	10	1.27778	2.66667	6	-0.722222	17	10	21	3.77778	7.57407	-0.0555556	48	4.72222
wifl	1988	139	95.3008	8.4582	9.7536	10.8333	25.5556	-0.555556	12.2222	30	1.66667	1.24	1.42	0.94	1.2	-0.4	0.6	0.1	0.495	0.389	0.193	2.5146	0.4318	4.0132	9.7536	12.2222	30	1.66667	1.07	0.1	0.193	4.0132	2.77778	5.83333	-0.222222	5.33333	10.0556	0.666667	2.72222	5.22222	0.166667	21	15	20	3.61111	7.03704	0.203704	56	3
wifl	1989	138	75.2856	3.6068	3.7084	12.6667	26.6667	1.11111	13	26.6667	1.66667	-1.02	-0.83	-0.32	0.47	1.2	1.1	1.6	-1.035	-0.76	-0.393	3.175	15.9766	0.7874	3.7084	13	26.6667	1.66667	0.075	1.6	-0.393	0.7874	3.94444	7.38889	0.555556	0.666667	5	-3.72222	3.38889	6.66667	0.111111	18	21	18	2.66667	6.35185	-1.01852	57	2.77778
wifl	1996	160	185.953	12.5222	10.1092	11.1667	26.1111	1.66667	11.8333	26.1111	-1.11111	0.75	1.01	1.46	2.18	0.3	1.1	0.8	-0.236	-0.391	-0.041	13.9446	4.3942	3.175	10.1092	11.8333	26.1111	-1.11111	1.82	0.8	-0.041	3.175	4.83333	7.72222	2	4.66667	8.72222	0.555556	4.83333	7.72222	1.94444	10	15	9	4.77778	8.05556	1.5	34	5.77778
wifl	1997	152	113.411	9.144	5.588	10.0556	23.3333	-0.555556	15.5556	31.6667	2.22222	0.28	0.65	1.05	1.83	1.7	-0.4	-0.6	-0.248	0.527	1.132	0.7112	0.8636	0.4572	5.588	15.5556	31.6667	2.22222	1.44	-0.6	1.132	0.4572	3.88889	7.38889	0.333333	4.83333	9.61111	0.111111	4.5	7.83333	1.11111	16	15	13	4.40741	8.27778	0.518519	44	4.83333
wifl	1999	143	126.492	2.7178	5.0546	9.5	27.2222	-1.11111	11.5556	30.5556	1.11111	-0.66	-0.33	-0.41	-0.68	1	1.3	1.4	-0.95	-0.88	-0.596	11.303	3.81	2.2606	5.0546	11.5556	30.5556	1.11111	-0.545	1.4	-0.596	2.2606	5.05556	7.72222	2.38889	5.11111	8.38889	1.88889	3.55556	6.55556	0.5	8	8	14	4.57407	7.55556	1.59259	30	5.61111
wifl	2000	155	88.6968	4.1402	7.5946	10.8889	25	-2.22222	13.2778	26.6667	1.11111	-0.83	0.29	0.35	-0.05	1.7	1.3	1.2	-1.09	-0.397	0.251	21.5646	5.1562	3.5306	7.5946	13.2778	26.6667	1.11111	0.15	1.2	0.251	3.5306	3.33333	6.33333	0.277778	5.55556	9.5	1.61111	4.83333	8.22222	1.44444	18	13	11	4.57407	8.01852	1.11111	42	5.05556
wifl	2001	162	85.217	5.9182	2.8194	8.66667	26.1111	-2.22222	13.6111	33.8889	0	0.29	0.45	-0.31	-0.3	1.7	0.9	0.2	-0.548	-0.05	0.282	11.6078	5.1816	3.81	2.8194	13.6111	33.8889	0	-0.305	0.2	0.282	3.81	4.05556	7.83333	0.222222	4.83333	9.88889	-0.222222	3.88889	7.16667	0.666667	17	17	16	4.25926	8.2963	0.222222	50	3.33333
wifl	2002	164	110.414	4.699	4.445	10.3333	23.3333	-0.555556	12	27.7778	-0.555556	-0.64	-0.43	-0.32	-0.63	1.1	-0.2	-0.1	-0.118	0.401	0.886	2.8702	7.2898	0.3048	4.445	12	27.7778	-0.555556	-0.475	-0.1	0.886	0.3048	4.66667	7.33333	2	5.77778	10.6111	0.944444	4.55556	7.22222	1.88889	12	17	4	5	8.38889	1.61111	33	4.05556
wifl	2003	168	119.05	16.4592	3.3782	9.66667	20.5556	1.11111	13	28.8889	0	1.75	1.51	1.18	0.89	-0.7	-0.3	-0.1	0.83	0.413	0.214	3.2766	4.7498	6.4262	3.3782	13	28.8889	0	1.035	-0.1	0.214	6.4262	6.72222	10.2222	3.16667	5.88889	10.8889	0.888889	5.33333	8.22222	2.44444	12	16	6	5.98148	9.77778	2.16667	34	4.66667
wifl	2004	150	104.14	7.62	3.302	10.1667	25.2657	-0.676328	13.9444	28.8889	2.22222	0.48	0.61	0.57	0.88	1.2	0.4	-0.9	-0.306	0.358	0.558	12.7254	1.2192	0.2286	3.302	13.9444	28.8889	2.22222	0.725	-0.9	0.558	0.2286	3.88889	6.72222	1.11111	5.88889	9.83333	2	5.05556	7.77778	2.27778	13	7	8	4.94444	8.11111	1.7963	28	6.72222
wifl	2005	165	99.3648	6.6802	10.7696	10.0556	25	-0.555556	14.2222	32.2222	3.33333	0.81	1.36	1.03	1.86	-3.1	0.3	-0.6	1.057	0.626	0.885	5.9182	8.382	2.1336	10.7696	14.2222	32.2222	3.33333	1.445	-0.6	0.885	2.1336	5	8.55556	1.44444	5.22222	10.5556	-0.0555556	5.44444	8.44444	2.5	13	17	5	5.22222	9.18519	1.2963	35	3.88889
wifl	2006	150	135.636	6.35	6.223	10.6667	26.6667	-0.555556	14	33.8889	1.11111	0.66	0.05	0.4	0.48	0.1	1.8	1.1	-0.521	-0.571	0.045	5.3086	13.4366	8.3058	6.223	14	33.8889	1.11111	0.44	1.1	0.045	8.3058	5.88889	8.94444	2.83333	4.61111	9.83333	-0.666667	3.22222	6.27778	0.166667	5	18	18	4.57407	8.35185	0.777778	41	5
wifl	2007	149	95.6056	5.08	4.0894	9.72222	25	-1.11111	12.8889	30	1.11111	0.04	-0.36	0.16	-0.1	-0.1	0.2	-0.1	0.125	0.026	0.348	11.2776	0.889	3.4036	4.0894	12.8889	30	1.11111	0.03	-0.1	0.348	3.4036	2.44444	6.33333	-1.5	5.94444	9.83333	2	3.5	6.72222	0.277778	24	10	20	3.96296	7.62963	0.259259	54	5.88889
wifl	2008	159	86.4616	6.0452	0.9652	8.05556	26.6667	-1.66667	13.3889	34.4444	0.555556	-0.77	-0.71	-1.52	-1.37	2.6	1.4	0.7	-1.552	-0.858	-0.345	4.5974	0.127	0	0.9652	13.3889	34.4444	0.555556	-1.445	0.7	-0.345	0	1.83333	5.22222	-1.66667	5.11111	10.3889	-0.166667	4	7.38889	0.611111	24	21	17	3.64815	7.66667	-0.407407	62	2.44444
wifl	2009	149	89.2556	3.2766	9.271	9.27778	26.6667	-2.22222	13.2222	30.5556	1.66667	-1.55	-1.59	-1.65	-0.88	1.9	0.4	0.8	-0.705	-0.106	0.326	12.8778	5.3086	3.7084	9.271	13.2222	30.5556	1.66667	-1.265	0.8	0.326	3.7084	2.38889	7.44444	-2.66667	3.55556	9.55556	-2.44444	1.55556	6.44444	-3.33333	24	24	26	2.5	7.81481	-2.81481	74	1.83333
wifl	2010	137	130.785	11.1252	8.382	9.38889	22.2222	-1.66667	11.6667	24.4444	0	0.82	0.44	0.78	0.62	-1.5	-0.7	1.2	1.462	0.978	0.658	5.8166	7.5692	6.731	8.382	11.6667	24.4444	0	0.7	1.2	0.658	6.731	4.55556	10.2222	-1.16667	4.77778	11.6111	-2	-0.444444	5.55556	-6.44444	27	20	25	2.96296	9.12963	-3.2037	72	2.38889
wifl	2011	172	93.98	10.3124	9.0678	8.22222	20	-1.66667	11.5556	23.8889	0	-0.83	-0.69	-0.42	-0.37	2.7	2.5	1.9	-1.554	-1.387	-0.199	8.6106	17.653	0.1524	9.0678	11.5556	23.8889	0	-0.395	1.9	-0.199	0.1524	4.66667	8.16667	1.11111	4.27778	9.16667	-0.666667	5.33333	8.66667	2.05556	14	18	8	4.75926	8.66667	0.833333	40	4.55556
wifl	2012	156	149.301	11.4808	7.0866	10.8889	26.6667	0	12.6667	28.8889	0.555556	-0.85	-1.05	-0.27	-1.26	0.5	0.7	-0.3	-0.382	0.11	0.757	2.3368	10.3124	6.1468	7.0866	12.6667	28.8889	0.555556	-0.765	-0.3	0.757	6.1468	3.77778	8.16667	-0.555556	5.05556	10.2222	-0.111111	2.38889	6.77778	-1.94444	19	18	26	3.74074	8.38889	-0.87037	63	4.66667
wifl	2013	167	64.3128	5.0546	6.2484	10.9444	25.5556	-1.11111	14.3889	29.4444	3.33333	-0.43	-0.63	-0.16	0.08	-0.2	1.5	0.2	-0.026	0.09	0.205	0.9144	3.5052	1.7526	6.2484	14.3889	29.4444	3.33333	-0.04	0.2	0.205	1.7526	1.11111	5	-2.83333	4.38889	9.44444	-0.722222	4.16667	7.94444	0.333333	26	20	16	3.22222	7.46296	-1.07407	62	3.77778
wifl	2014	142	116.738	7.6708	6.6548	10.7222	24.4444	0.555556	14.6667	31.1111	1.11111	0.38	0.97	1.13	1.8	0.1	-0.9	0.8	0.018	0.295	1.001	10.5156	4.4958	4.6482	6.6548	14.6667	31.1111	1.11111	1.465	0.8	1.001	4.6482	2.83333	7.88889	-2.27778	3.38889	8.66667	-1.83333	0.0555556	5.05556	-5	25	21	27	2.09259	7.2037	-3.03704	73	1.11111
wiwa	1985	103	68.961	2.667	2.3876	11.1667	25.5556	0	12.7778	28.8889	-2.22222	0.94	0.57	0.19	0	1.2	0.8	1.2	-0.696	-0.468	-0.706	3.8608	5.1054	0	2.3876	12.7778	28.8889	-2.22222	0.19	1.2	-0.706	0	1.22222	5.55556	-3.05556	3.5	8.22222	-1.22222	2	5.66667	-1.66667	30	22	25	2.24074	6.48148	-1.98148	77	4.66667
wiwa	1986	111	111.125	4.6736	6.35	9.55556	26.1111	-1.11111	12.8333	31.6667	1.66667	1.61	2.18	1.55	1.16	-1	0.5	0.3	0.028	-0.107	0.353	21.844	8.128	2.3114	6.35	12.8333	31.6667	1.66667	1.55	0.3	0.353	2.3114	4.72222	8.33333	1.11111	5.72222	9.22222	2.27778	-0.222222	3.72222	-4.16667	16	10	27	3.40741	7.09259	-0.259259	53	1.22222
wiwa	1987	109	95.7834	3.9624	3.556	11.5556	28.3333	-0.555556	14.5556	33.3333	1.11111	1.75	2.1	2.16	1.85	-1.3	-1.4	-1.3	1.716	1.855	2.107	8.2042	7.747	0.508	3.556	14.5556	33.3333	1.11111	2.16	-1.3	2.107	0.508	3	6.72222	-0.722222	5.66667	10	1.27778	2.66667	6	-0.722222	17	10	21	3.77778	7.57407	-0.0555556	48	4.72222
wiwa	1988	113	95.3008	8.4582	9.7536	10.8333	25.5556	-0.555556	12.2222	30	1.66667	1.24	1.42	0.94	1.2	-0.4	0.6	0.1	0.495	0.389	0.193	2.5146	0.4318	4.0132	9.7536	12.2222	30	1.66667	0.94	0.1	0.193	4.0132	2.77778	5.83333	-0.222222	5.33333	10.0556	0.666667	2.72222	5.22222	0.166667	21	15	20	3.61111	7.03704	0.203704	56	3
wiwa	1989	107	75.2856	3.6068	3.7084	12.6667	26.6667	1.11111	13	26.6667	1.66667	-1.02	-0.83	-0.32	0.47	1.2	1.1	1.6	-1.035	-0.76	-0.393	3.175	15.9766	0.7874	3.7084	13	26.6667	1.66667	-0.32	1.6	-0.393	0.7874	3.94444	7.38889	0.555556	0.666667	5	-3.72222	3.38889	6.66667	0.111111	18	21	18	2.66667	6.35185	-1.01852	57	2.77778
wiwa	1996	116	185.953	12.5222	10.1092	11.1667	26.1111	1.66667	11.8333	26.1111	-1.11111	0.75	1.01	1.46	2.18	0.3	1.1	0.8	-0.236	-0.391	-0.041	13.9446	4.3942	3.175	10.1092	11.8333	26.1111	-1.11111	1.46	0.8	-0.041	3.175	4.83333	7.72222	2	4.66667	8.72222	0.555556	4.83333	7.72222	1.94444	10	15	9	4.77778	8.05556	1.5	34	5.77778
wiwa	1997	112	113.411	9.144	5.588	10.0556	23.3333	-0.555556	15.5556	31.6667	2.22222	0.28	0.65	1.05	1.83	1.7	-0.4	-0.6	-0.248	0.527	1.132	0.7112	0.8636	0.4572	5.588	15.5556	31.6667	2.22222	1.05	-0.6	1.132	0.4572	3.88889	7.38889	0.333333	4.83333	9.61111	0.111111	4.5	7.83333	1.11111	16	15	13	4.40741	8.27778	0.518519	44	4.83333
wiwa	1998	110	152.425	4.6482	14.732	9.83333	28.3333	-0.555556	12.4444	27.7778	2.22222	1.56	2.01	1.27	0.7	-2	-2.4	-1.4	2.751	2.658	2.206	25.273	6.2738	2.667	14.732	12.4444	27.7778	2.22222	1.27	-1.4	2.206	2.667	5.61111	8.77778	2.44444	6.11111	10.0556	2.16667	3.27778	6.88889	-0.388889	7	7	22	5	8.57407	1.40741	36	3.88889
wiwa	1999	116	126.492	2.7178	5.0546	9.5	27.2222	-1.11111	11.5556	30.5556	1.11111	-0.66	-0.33	-0.41	-0.68	1	1.3	1.4	-0.95	-0.88	-0.596	11.303	3.81	2.2606	5.0546	11.5556	30.5556	1.11111	-0.41	1.4	-0.596	2.2606	5.05556	7.72222	2.38889	5.11111	8.38889	1.88889	3.55556	6.55556	0.5	8	8	14	4.57407	7.55556	1.59259	30	5.61111
wiwa	2000	108	88.6968	4.1402	7.5946	10.8889	25	-2.22222	13.2778	26.6667	1.11111	-0.83	0.29	0.35	-0.05	1.7	1.3	1.2	-1.09	-0.397	0.251	21.5646	5.1562	3.5306	7.5946	13.2778	26.6667	1.11111	0.35	1.2	0.251	3.5306	3.33333	6.33333	0.277778	5.55556	9.5	1.61111	4.83333	8.22222	1.44444	18	13	11	4.57407	8.01852	1.11111	42	5.05556
wiwa	2001	112	85.217	5.9182	2.8194	8.66667	26.1111	-2.22222	13.6111	33.8889	0	0.29	0.45	-0.31	-0.3	1.7	0.9	0.2	-0.548	-0.05	0.282	11.6078	5.1816	3.81	2.8194	13.6111	33.8889	0	-0.31	0.2	0.282	3.81	4.05556	7.83333	0.222222	4.83333	9.88889	-0.222222	3.88889	7.16667	0.666667	17	17	16	4.25926	8.2963	0.222222	50	3.33333
wiwa	2002	111	110.414	4.699	4.445	10.3333	23.3333	-0.555556	12	27.7778	-0.555556	-0.64	-0.43	-0.32	-0.63	1.1	-0.2	-0.1	-0.118	0.401	0.886	2.8702	7.2898	0.3048	4.445	12	27.7778	-0.555556	-0.32	-0.1	0.886	0.3048	4.66667	7.33333	2	5.77778	10.6111	0.944444	4.55556	7.22222	1.88889	12	17	4	5	8.38889	1.61111	33	4.05556
wiwa	2003	116	119.05	16.4592	3.3782	9.66667	20.5556	1.11111	13	28.8889	0	1.75	1.51	1.18	0.89	-0.7	-0.3	-0.1	0.83	0.413	0.214	3.2766	4.7498	6.4262	3.3782	13	28.8889	0	1.18	-0.1	0.214	6.4262	6.72222	10.2222	3.16667	5.88889	10.8889	0.888889	5.33333	8.22222	2.44444	12	16	6	5.98148	9.77778	2.16667	34	4.66667
wiwa	2004	106	104.14	7.62	3.302	10.1667	25.2657	-0.676328	13.9444	28.8889	2.22222	0.48	0.61	0.57	0.88	1.2	0.4	-0.9	-0.306	0.358	0.558	12.7254	1.2192	0.2286	3.302	13.9444	28.8889	2.22222	0.57	-0.9	0.558	0.2286	3.88889	6.72222	1.11111	5.88889	9.83333	2	5.05556	7.77778	2.27778	13	7	8	4.94444	8.11111	1.7963	28	6.72222
wiwa	2005	111	99.3648	6.6802	10.7696	10.0556	25	-0.555556	14.2222	32.2222	3.33333	0.81	1.36	1.03	1.86	-3.1	0.3	-0.6	1.057	0.626	0.885	5.9182	8.382	2.1336	10.7696	14.2222	32.2222	3.33333	1.03	-0.6	0.885	2.1336	5	8.55556	1.44444	5.22222	10.5556	-0.0555556	5.44444	8.44444	2.5	13	17	5	5.22222	9.18519	1.2963	35	3.88889
wiwa	2006	117	135.636	6.35	6.223	10.6667	26.6667	-0.555556	14	33.8889	1.11111	0.66	0.05	0.4	0.48	0.1	1.8	1.1	-0.521	-0.571	0.045	5.3086	13.4366	8.3058	6.223	14	33.8889	1.11111	0.4	1.1	0.045	8.3058	5.88889	8.94444	2.83333	4.61111	9.83333	-0.666667	3.22222	6.27778	0.166667	5	18	18	4.57407	8.35185	0.777778	41	5
wiwa	2007	117	95.6056	5.08	4.0894	9.72222	25	-1.11111	12.8889	30	1.11111	0.04	-0.36	0.16	-0.1	-0.1	0.2	-0.1	0.125	0.026	0.348	11.2776	0.889	3.4036	4.0894	12.8889	30	1.11111	0.16	-0.1	0.348	3.4036	2.44444	6.33333	-1.5	5.94444	9.83333	2	3.5	6.72222	0.277778	24	10	20	3.96296	7.62963	0.259259	54	5.88889
wiwa	2010	106	130.785	11.1252	8.382	9.38889	22.2222	-1.66667	11.6667	24.4444	0	0.82	0.44	0.78	0.62	-1.5	-0.7	1.2	1.462	0.978	0.658	5.8166	7.5692	6.731	8.382	11.6667	24.4444	0	0.78	1.2	0.658	6.731	4.55556	10.2222	-1.16667	4.77778	11.6111	-2	-0.444444	5.55556	-6.44444	27	20	25	2.96296	9.12963	-3.2037	72	2.38889
wiwa	2011	121	93.98	10.3124	9.0678	8.22222	20	-1.66667	11.5556	23.8889	0	-0.83	-0.69	-0.42	-0.37	2.7	2.5	1.9	-1.554	-1.387	-0.199	8.6106	17.653	0.1524	9.0678	11.5556	23.8889	0	-0.42	1.9	-0.199	0.1524	4.66667	8.16667	1.11111	4.27778	9.16667	-0.666667	5.33333	8.66667	2.05556	14	18	8	4.75926	8.66667	0.833333	40	4.55556
wiwa	2012	117	149.301	11.4808	7.0866	10.8889	26.6667	0	12.6667	28.8889	0.555556	-0.85	-1.05	-0.27	-1.26	0.5	0.7	-0.3	-0.382	0.11	0.757	2.3368	10.3124	6.1468	7.0866	12.6667	28.8889	0.555556	-0.27	-0.3	0.757	6.1468	3.77778	8.16667	-0.555556	5.05556	10.2222	-0.111111	2.38889	6.77778	-1.94444	19	18	26	3.74074	8.38889	-0.87037	63	4.66667
wiwa	2013	111	64.3128	5.0546	6.2484	10.9444	25.5556	-1.11111	14.3889	29.4444	3.33333	-0.43	-0.63	-0.16	0.08	-0.2	1.5	0.2	-0.026	0.09	0.205	0.9144	3.5052	1.7526	6.2484	14.3889	29.4444	3.33333	-0.16	0.2	0.205	1.7526	1.11111	5	-2.83333	4.38889	9.44444	-0.722222	4.16667	7.94444	0.333333	26	20	16	3.22222	7.46296	-1.07407	62	3.77778
wiwa	2014	111	116.738	7.6708	6.6548	10.7222	24.4444	0.555556	14.6667	31.1111	1.11111	0.38	0.97	1.13	1.8	0.1	-0.9	0.8	0.018	0.295	1.001	10.5156	4.4958	4.6482	6.6548	14.6667	31.1111	1.11111	1.13	0.8	1.001	4.6482	2.83333	7.88889	-2.27778	3.38889	8.66667	-1.83333	0.0555556	5.05556	-5	25	21	27	2.09259	7.2037	-3.03704	73	1.11111
howr	1986	137	111.125	4.6736	6.35	9.55556	26.1111	-1.11111	12.8333	31.6667	1.66667	1.61	2.18	1.55	1.16	-1	0.5	0.3	0.028	-0.107	0.353	21.844	8.128	2.3114	6.35	12.8333	31.6667	1.66667	1.865	0.4	0.123	5.2197	4.72222	8.33333	1.11111	5.72222	9.22222	2.27778	-0.222222	3.72222	-4.16667	16	10	27	3.40741	7.09259	-0.259259	53	1.22222
howr	1988	133	95.3008	8.4582	9.7536	10.8333	25.5556	-0.555556	12.2222	30	1.66667	1.24	1.42	0.94	1.2	-0.4	0.6	0.1	0.495	0.389	0.193	2.5146	0.4318	4.0132	9.7536	12.2222	30	1.66667	1.18	0.35	0.291	2.2225	2.77778	5.83333	-0.222222	5.33333	10.0556	0.666667	2.72222	5.22222	0.166667	21	15	20	3.61111	7.03704	0.203704	56	3
howr	1989	124	75.2856	3.6068	3.7084	12.6667	26.6667	1.11111	13	26.6667	1.66667	-1.02	-0.83	-0.32	0.47	1.2	1.1	1.6	-1.035	-0.76	-0.393	3.175	15.9766	0.7874	3.7084	13	26.6667	1.66667	-0.575	1.35	-0.5765	8.382	3.94444	7.38889	0.555556	0.666667	5	-3.72222	3.38889	6.66667	0.111111	18	21	18	2.66667	6.35185	-1.01852	57	2.77778
howr	1997	113	113.411	9.144	5.588	10.0556	23.3333	-0.555556	15.5556	31.6667	2.22222	0.28	0.65	1.05	1.83	1.7	-0.4	-0.6	-0.248	0.527	1.132	0.7112	0.8636	0.4572	5.588	15.5556	31.6667	2.22222	0.85	-0.5	0.8295	0.6604	3.88889	7.38889	0.333333	4.83333	9.61111	0.111111	4.5	7.83333	1.11111	16	15	13	4.40741	8.27778	0.518519	44	4.83333
howr	1998	119	152.425	4.6482	14.732	9.83333	28.3333	-0.555556	12.4444	27.7778	2.22222	1.56	2.01	1.27	0.7	-2	-2.4	-1.4	2.751	2.658	2.206	25.273	6.2738	2.667	14.732	12.4444	27.7778	2.22222	1.64	-1.9	2.432	4.4704	5.61111	8.77778	2.44444	6.11111	10.0556	2.16667	3.27778	6.88889	-0.388889	7	7	22	5	8.57407	1.40741	36	3.88889
howr	2000	135	88.6968	4.1402	7.5946	10.8889	25	-2.22222	13.2778	26.6667	1.11111	-0.83	0.29	0.35	-0.05	1.7	1.3	1.2	-1.09	-0.397	0.251	21.5646	5.1562	3.5306	7.5946	13.2778	26.6667	1.11111	0.32	1.25	-0.073	4.3434	3.33333	6.33333	0.277778	5.55556	9.5	1.61111	4.83333	8.22222	1.44444	18	13	11	4.57407	8.01852	1.11111	42	5.05556
howr	2001	128	85.217	5.9182	2.8194	8.66667	26.1111	-2.22222	13.6111	33.8889	0	0.29	0.45	-0.31	-0.3	1.7	0.9	0.2	-0.548	-0.05	0.282	11.6078	5.1816	3.81	2.8194	13.6111	33.8889	0	0.07	0.55	0.116	4.4958	4.05556	7.83333	0.222222	4.83333	9.88889	-0.222222	3.88889	7.16667	0.666667	17	17	16	4.25926	8.2963	0.222222	50	3.33333
howr	2003	133	119.05	16.4592	3.3782	9.66667	20.5556	1.11111	13	28.8889	0	1.75	1.51	1.18	0.89	-0.7	-0.3	-0.1	0.83	0.413	0.214	3.2766	4.7498	6.4262	3.3782	13	28.8889	0	1.345	-0.2	0.3135	5.588	6.72222	10.2222	3.16667	5.88889	10.8889	0.888889	5.33333	8.22222	2.44444	12	16	6	5.98148	9.77778	2.16667	34	4.66667
howr	2004	114	104.14	7.62	3.302	10.1667	25.2657	-0.676328	13.9444	28.8889	2.22222	0.48	0.61	0.57	0.88	1.2	0.4	-0.9	-0.306	0.358	0.558	12.7254	1.2192	0.2286	3.302	13.9444	28.8889	2.22222	0.59	-0.25	0.458	0.7239	3.88889	6.72222	1.11111	5.88889	9.83333	2	5.05556	7.77778	2.27778	13	7	8	4.94444	8.11111	1.7963	28	6.72222
howr	2005	111	99.3648	6.6802	10.7696	10.0556	25	-0.555556	14.2222	32.2222	3.33333	0.81	1.36	1.03	1.86	-3.1	0.3	-0.6	1.057	0.626	0.885	5.9182	8.382	2.1336	10.7696	14.2222	32.2222	3.33333	1.195	-0.15	0.7555	5.2578	5	8.55556	1.44444	5.22222	10.5556	-0.0555556	5.44444	8.44444	2.5	13	17	5	5.22222	9.18519	1.2963	35	3.88889
howr	2006	121	135.636	6.35	6.223	10.6667	26.6667	-0.555556	14	33.8889	1.11111	0.66	0.05	0.4	0.48	0.1	1.8	1.1	-0.521	-0.571	0.045	5.3086	13.4366	8.3058	6.223	14	33.8889	1.11111	0.225	1.45	-0.263	10.8712	5.88889	8.94444	2.83333	4.61111	9.83333	-0.666667	3.22222	6.27778	0.166667	5	18	18	4.57407	8.35185	0.777778	41	5
howr	2007	96	95.6056	5.08	4.0894	9.72222	25	-1.11111	12.8889	30	1.11111	0.04	-0.36	0.16	-0.1	-0.1	0.2	-0.1	0.125	0.026	0.348	11.2776	0.889	3.4036	4.0894	12.8889	30	1.11111	-0.1	0.05	0.187	2.1463	2.44444	6.33333	-1.5	5.94444	9.83333	2	3.5	6.72222	0.277778	24	10	20	3.96296	7.62963	0.259259	54	5.88889
howr	2008	116	86.4616	6.0452	0.9652	8.05556	26.6667	-1.66667	13.3889	34.4444	0.555556	-0.77	-0.71	-1.52	-1.37	2.6	1.4	0.7	-1.552	-0.858	-0.345	4.5974	0.127	0	0.9652	13.3889	34.4444	0.555556	-1.115	1.05	-0.6015	0.0635	1.83333	5.22222	-1.66667	5.11111	10.3889	-0.166667	4	7.38889	0.611111	24	21	17	3.64815	7.66667	-0.407407	62	2.44444
howr	2009	107	89.2556	3.2766	9.271	9.27778	26.6667	-2.22222	13.2222	30.5556	1.66667	-1.55	-1.59	-1.65	-0.88	1.9	0.4	0.8	-0.705	-0.106	0.326	12.8778	5.3086	3.7084	9.271	13.2222	30.5556	1.66667	-1.62	0.6	0.11	4.5085	2.38889	7.44444	-2.66667	3.55556	9.55556	-2.44444	1.55556	6.44444	-3.33333	24	24	26	2.5	7.81481	-2.81481	74	1.83333
howr	2010	107	130.785	11.1252	8.382	9.38889	22.2222	-1.66667	11.6667	24.4444	0	0.82	0.44	0.78	0.62	-1.5	-0.7	1.2	1.462	0.978	0.658	5.8166	7.5692	6.731	8.382	11.6667	24.4444	0	0.61	0.25	0.818	7.1501	4.55556	10.2222	-1.16667	4.77778	11.6111	-2	-0.444444	5.55556	-6.44444	27	20	25	2.96296	9.12963	-3.2037	72	2.38889
howr	2011	110	93.98	10.3124	9.0678	8.22222	20	-1.66667	11.5556	23.8889	0	-0.83	-0.69	-0.42	-0.37	2.7	2.5	1.9	-1.554	-1.387	-0.199	8.6106	17.653	0.1524	9.0678	11.5556	23.8889	0	-0.555	2.2	-0.793	8.9027	4.66667	8.16667	1.11111	4.27778	9.16667	-0.666667	5.33333	8.66667	2.05556	14	18	8	4.75926	8.66667	0.833333	40	4.55556
howr	2012	113	149.301	11.4808	7.0866	10.8889	26.6667	0	12.6667	28.8889	0.555556	-0.85	-1.05	-0.27	-1.26	0.5	0.7	-0.3	-0.382	0.11	0.757	2.3368	10.3124	6.1468	7.0866	12.6667	28.8889	0.555556	-0.66	0.2	0.4335	8.2296	3.77778	8.16667	-0.555556	5.05556	10.2222	-0.111111	2.38889	6.77778	-1.94444	19	18	26	3.74074	8.38889	-0.87037	63	4.66667
howr	2013	115	64.3128	5.0546	6.2484	10.9444	25.5556	-1.11111	14.3889	29.4444	3.33333	-0.43	-0.63	-0.16	0.08	-0.2	1.5	0.2	-0.026	0.09	0.205	0.9144	3.5052	1.7526	6.2484	14.3889	29.4444	3.33333	-0.395	0.85	0.1475	2.6289	1.11111	5	-2.83333	4.38889	9.44444	-0.722222	4.16667	7.94444	0.333333	26	20	16	3.22222	7.46296	-1.07407	62	3.77778
howr	2014	102	116.738	7.6708	6.6548	10.7222	24.4444	0.555556	14.6667	31.1111	1.11111	0.38	0.97	1.13	1.8	0.1	-0.9	0.8	0.018	0.295	1.001	10.5156	4.4958	4.6482	6.6548	14.6667	31.1111	1.11111	1.05	-0.05	0.648	4.572	2.83333	7.88889	-2.27778	3.38889	8.66667	-1.83333	0.0555556	5.05556	-5	25	21	27	2.09259	7.2037	-3.03704	73	1.11111
ocwa	1985	97	68.961	2.667	2.3876	11.1667	25.5556	0	12.7778	28.8889	-2.22222	0.94	0.57	0.19	0	1.2	0.8	1.2	-0.696	-0.468	-0.706	3.8608	5.1054	0	2.667	11.1667	25.5556	0	0.57	0.8	-0.468	5.1054	1.22222	5.55556	-3.05556	3.5	8.22222	-1.22222	2	5.66667	-1.66667	30	22	25	2.24074	6.48148	-1.98148	77	4.66667
ocwa	1986	87	111.125	4.6736	6.35	9.55556	26.1111	-1.11111	12.8333	31.6667	1.66667	1.61	2.18	1.55	1.16	-1	0.5	0.3	0.028	-0.107	0.353	21.844	8.128	2.3114	4.6736	9.55556	26.1111	-1.11111	2.18	0.5	-0.107	8.128	4.72222	8.33333	1.11111	5.72222	9.22222	2.27778	-0.222222	3.72222	-4.16667	16	10	27	3.40741	7.09259	-0.259259	53	1.22222
ocwa	1987	91	95.7834	3.9624	3.556	11.5556	28.3333	-0.555556	14.5556	33.3333	1.11111	1.75	2.1	2.16	1.85	-1.3	-1.4	-1.3	1.716	1.855	2.107	8.2042	7.747	0.508	3.9624	11.5556	28.3333	-0.555556	2.1	-1.4	1.855	7.747	3	6.72222	-0.722222	5.66667	10	1.27778	2.66667	6	-0.722222	17	10	21	3.77778	7.57407	-0.0555556	48	4.72222
ocwa	1988	97	95.3008	8.4582	9.7536	10.8333	25.5556	-0.555556	12.2222	30	1.66667	1.24	1.42	0.94	1.2	-0.4	0.6	0.1	0.495	0.389	0.193	2.5146	0.4318	4.0132	8.4582	10.8333	25.5556	-0.555556	1.42	0.6	0.389	0.4318	2.77778	5.83333	-0.222222	5.33333	10.0556	0.666667	2.72222	5.22222	0.166667	21	15	20	3.61111	7.03704	0.203704	56	3
ocwa	1989	100	75.2856	3.6068	3.7084	12.6667	26.6667	1.11111	13	26.6667	1.66667	-1.02	-0.83	-0.32	0.47	1.2	1.1	1.6	-1.035	-0.76	-0.393	3.175	15.9766	0.7874	3.6068	12.6667	26.6667	1.11111	-0.83	1.1	-0.76	15.9766	3.94444	7.38889	0.555556	0.666667	5	-3.72222	3.38889	6.66667	0.111111	18	21	18	2.66667	6.35185	-1.01852	57	2.77778
ocwa	1996	95	185.953	12.5222	10.1092	11.1667	26.1111	1.66667	11.8333	26.1111	-1.11111	0.75	1.01	1.46	2.18	0.3	1.1	0.8	-0.236	-0.391	-0.041	13.9446	4.3942	3.175	12.5222	11.1667	26.1111	1.66667	1.01	1.1	-0.391	4.3942	4.83333	7.72222	2	4.66667	8.72222	0.555556	4.83333	7.72222	1.94444	10	15	9	4.77778	8.05556	1.5	34	5.77778
ocwa	1997	93	113.411	9.144	5.588	10.0556	23.3333	-0.555556	15.5556	31.6667	2.22222	0.28	0.65	1.05	1.83	1.7	-0.4	-0.6	-0.248	0.527	1.132	0.7112	0.8636	0.4572	9.144	10.0556	23.3333	-0.555556	0.65	-0.4	0.527	0.8636	3.88889	7.38889	0.333333	4.83333	9.61111	0.111111	4.5	7.83333	1.11111	16	15	13	4.40741	8.27778	0.518519	44	4.83333
ocwa	1998	91	152.425	4.6482	14.732	9.83333	28.3333	-0.555556	12.4444	27.7778	2.22222	1.56	2.01	1.27	0.7	-2	-2.4	-1.4	2.751	2.658	2.206	25.273	6.2738	2.667	4.6482	9.83333	28.3333	-0.555556	2.01	-2.4	2.658	6.2738	5.61111	8.77778	2.44444	6.11111	10.0556	2.16667	3.27778	6.88889	-0.388889	7	7	22	5	8.57407	1.40741	36	3.88889
ocwa	1999	104	126.492	2.7178	5.0546	9.5	27.2222	-1.11111	11.5556	30.5556	1.11111	-0.66	-0.33	-0.41	-0.68	1	1.3	1.4	-0.95	-0.88	-0.596	11.303	3.81	2.2606	2.7178	9.5	27.2222	-1.11111	-0.33	1.3	-0.88	3.81	5.05556	7.72222	2.38889	5.11111	8.38889	1.88889	3.55556	6.55556	0.5	8	8	14	4.57407	7.55556	1.59259	30	5.61111
ocwa	2000	93	88.6968	4.1402	7.5946	10.8889	25	-2.22222	13.2778	26.6667	1.11111	-0.83	0.29	0.35	-0.05	1.7	1.3	1.2	-1.09	-0.397	0.251	21.5646	5.1562	3.5306	4.1402	10.8889	25	-2.22222	0.29	1.3	-0.397	5.1562	3.33333	6.33333	0.277778	5.55556	9.5	1.61111	4.83333	8.22222	1.44444	18	13	11	4.57407	8.01852	1.11111	42	5.05556
ocwa	2001	97	85.217	5.9182	2.8194	8.66667	26.1111	-2.22222	13.6111	33.8889	0	0.29	0.45	-0.31	-0.3	1.7	0.9	0.2	-0.548	-0.05	0.282	11.6078	5.1816	3.81	5.9182	8.66667	26.1111	-2.22222	0.45	0.9	-0.05	5.1816	4.05556	7.83333	0.222222	4.83333	9.88889	-0.222222	3.88889	7.16667	0.666667	17	17	16	4.25926	8.2963	0.222222	50	3.33333
ocwa	2002	119	110.414	4.699	4.445	10.3333	23.3333	-0.555556	12	27.7778	-0.555556	-0.64	-0.43	-0.32	-0.63	1.1	-0.2	-0.1	-0.118	0.401	0.886	2.8702	7.2898	0.3048	4.699	10.3333	23.3333	-0.555556	-0.43	-0.2	0.401	7.2898	4.66667	7.33333	2	5.77778	10.6111	0.944444	4.55556	7.22222	1.88889	12	17	4	5	8.38889	1.61111	33	4.05556
ocwa	2003	93	119.05	16.4592	3.3782	9.66667	20.5556	1.11111	13	28.8889	0	1.75	1.51	1.18	0.89	-0.7	-0.3	-0.1	0.83	0.413	0.214	3.2766	4.7498	6.4262	16.4592	9.66667	20.5556	1.11111	1.51	-0.3	0.413	4.7498	6.72222	10.2222	3.16667	5.88889	10.8889	0.888889	5.33333	8.22222	2.44444	12	16	6	5.98148	9.77778	2.16667	34	4.66667
ocwa	2004	88	104.14	7.62	3.302	10.1667	25.2657	-0.676328	13.9444	28.8889	2.22222	0.48	0.61	0.57	0.88	1.2	0.4	-0.9	-0.306	0.358	0.558	12.7254	1.2192	0.2286	7.62	10.1667	25.2657	-0.676328	0.61	0.4	0.358	1.2192	3.88889	6.72222	1.11111	5.88889	9.83333	2	5.05556	7.77778	2.27778	13	7	8	4.94444	8.11111	1.7963	28	6.72222
ocwa	2005	86	99.3648	6.6802	10.7696	10.0556	25	-0.555556	14.2222	32.2222	3.33333	0.81	1.36	1.03	1.86	-3.1	0.3	-0.6	1.057	0.626	0.885	5.9182	8.382	2.1336	6.6802	10.0556	25	-0.555556	1.36	0.3	0.626	8.382	5	8.55556	1.44444	5.22222	10.5556	-0.0555556	5.44444	8.44444	2.5	13	17	5	5.22222	9.18519	1.2963	35	3.88889
ocwa	2006	97	135.636	6.35	6.223	10.6667	26.6667	-0.555556	14	33.8889	1.11111	0.66	0.05	0.4	0.48	0.1	1.8	1.1	-0.521	-0.571	0.045	5.3086	13.4366	8.3058	6.35	10.6667	26.6667	-0.555556	0.05	1.8	-0.571	13.4366	5.88889	8.94444	2.83333	4.61111	9.83333	-0.666667	3.22222	6.27778	0.166667	5	18	18	4.57407	8.35185	0.777778	41	5
ocwa	2007	76	95.6056	5.08	4.0894	9.72222	25	-1.11111	12.8889	30	1.11111	0.04	-0.36	0.16	-0.1	-0.1	0.2	-0.1	0.125	0.026	0.348	11.2776	0.889	3.4036	5.08	9.72222	25	-1.11111	-0.36	0.2	0.026	0.889	2.44444	6.33333	-1.5	5.94444	9.83333	2	3.5	6.72222	0.277778	24	10	20	3.96296	7.62963	0.259259	54	5.88889
ocwa	2008	100	86.4616	6.0452	0.9652	8.05556	26.6667	-1.66667	13.3889	34.4444	0.555556	-0.77	-0.71	-1.52	-1.37	2.6	1.4	0.7	-1.552	-0.858	-0.345	4.5974	0.127	0	6.0452	8.05556	26.6667	-1.66667	-0.71	1.4	-0.858	0.127	1.83333	5.22222	-1.66667	5.11111	10.3889	-0.166667	4	7.38889	0.611111	24	21	17	3.64815	7.66667	-0.407407	62	2.44444
ocwa	2009	95	89.2556	3.2766	9.271	9.27778	26.6667	-2.22222	13.2222	30.5556	1.66667	-1.55	-1.59	-1.65	-0.88	1.9	0.4	0.8	-0.705	-0.106	0.326	12.8778	5.3086	3.7084	3.2766	9.27778	26.6667	-2.22222	-1.59	0.4	-0.106	5.3086	2.38889	7.44444	-2.66667	3.55556	9.55556	-2.44444	1.55556	6.44444	-3.33333	24	24	26	2.5	7.81481	-2.81481	74	1.83333
ocwa	2010	86	130.785	11.1252	8.382	9.38889	22.2222	-1.66667	11.6667	24.4444	0	0.82	0.44	0.78	0.62	-1.5	-0.7	1.2	1.462	0.978	0.658	5.8166	7.5692	6.731	11.1252	9.38889	22.2222	-1.66667	0.44	-0.7	0.978	7.5692	4.55556	10.2222	-1.16667	4.77778	11.6111	-2	-0.444444	5.55556	-6.44444	27	20	25	2.96296	9.12963	-3.2037	72	2.38889
ocwa	2011	107	93.98	10.3124	9.0678	8.22222	20	-1.66667	11.5556	23.8889	0	-0.83	-0.69	-0.42	-0.37	2.7	2.5	1.9	-1.554	-1.387	-0.199	8.6106	17.653	0.1524	10.3124	8.22222	20	-1.66667	-0.69	2.5	-1.387	17.653	4.66667	8.16667	1.11111	4.27778	9.16667	-0.666667	5.33333	8.66667	2.05556	14	18	8	4.75926	8.66667	0.833333	40	4.55556
ocwa	2012	98	149.301	11.4808	7.0866	10.8889	26.6667	0	12.6667	28.8889	0.555556	-0.85	-1.05	-0.27	-1.26	0.5	0.7	-0.3	-0.382	0.11	0.757	2.3368	10.3124	6.1468	11.4808	10.8889	26.6667	0	-1.05	0.7	0.11	10.3124	3.77778	8.16667	-0.555556	5.05556	10.2222	-0.111111	2.38889	6.77778	-1.94444	19	18	26	3.74074	8.38889	-0.87037	63	4.66667
ocwa	2013	88	64.3128	5.0546	6.2484	10.9444	25.5556	-1.11111	14.3889	29.4444	3.33333	-0.43	-0.63	-0.16	0.08	-0.2	1.5	0.2	-0.026	0.09	0.205	0.9144	3.5052	1.7526	5.0546	10.9444	25.5556	-1.11111	-0.63	1.5	0.09	3.5052	1.11111	5	-2.83333	4.38889	9.44444	-0.722222	4.16667	7.94444	0.333333	26	20	16	3.22222	7.46296	-1.07407	62	3.77778
ocwa	2014	100	116.738	7.6708	6.6548	10.7222	24.4444	0.555556	14.6667	31.1111	1.11111	0.38	0.97	1.13	1.8	0.1	-0.9	0.8	0.018	0.295	1.001	10.5156	4.4958	4.6482	7.6708	10.7222	24.4444	0.555556	0.97	-0.9	0.295	4.4958	2.83333	7.88889	-2.27778	3.38889	8.66667	-1.83333	0.0555556	5.05556	-5	25	21	27	2.09259	7.2037	-3.03704	73	1.11111
[truncated: 60 more columns]
