# Supplementary material for: Idiosyncratic changes in spring arrival dates of Pacific Northwest migratory birds
Source: PeerJ. 2019 Nov 7;7:e7999. doi: 10.7717/peerj.7999 (PMC6842555; doi:10.7717/peerj.7999)
Supplement: Supplemental Information 8 [file peerj-07-7999-s008.csv]

	(Intercept)	Year	rainfallCorvallis	CorRain	CorAvgT	PDO	MEI	SACrainFeb	SACrainMar	SACrainApr	WinterMaxT_1Lag	WinterMinT_1Lag	WinterMaxT_2Lag	WinterMinT_2Lag	WinterMaxT_2MovAvg	WinterMinT_2MovAvg	WinterMaxT_3MovAvg	WinterMinT_3MovAvg	df	logLik	BIC	delta	weight
null	141.541666666667	NA	NA	NA	NA	NA	NA	NA	NA	NA	NA	NA	NA	NA	NA	NA	NA	NA	2	-79.5774330371273	165.510973734951	0	0.144921441306869
SACrainMar	138.401275614598	NA	NA	NA	NA	NA	NA	NA	1.29345092242391	NA	NA	NA	NA	NA	NA	NA	NA	NA	3	-78.0643833619556	165.662928214955	0.151954480004491	0.134318597537339
CorAvgT	195.884401201503	NA	NA	NA	-0.976582275429478	NA	NA	NA	NA	NA	NA	NA	NA	NA	NA	NA	NA	NA	3	-78.6117646009182	166.75769069288	1.24671695792964	0.0776982964596608
WinterMaxT_2Lag	202.67245957987	NA	NA	NA	NA	NA	NA	NA	NA	NA	NA	NA	-1.3079213983841	NA	NA	NA	NA	NA	3	-78.757318127743	167.04879774653	1.5378240115794	0.0671735659110603
SACrainApr	139.650437716217	NA	NA	NA	NA	NA	NA	NA	NA	1.70894182269522	NA	NA	NA	NA	NA	NA	NA	NA	3	-78.8943761109757	167.322913712995	1.81193997804473	0.0585699532838794
SACrainFeb	140.267626317425	NA	NA	NA	NA	NA	NA	0.367998175253235	NA	NA	NA	NA	NA	NA	NA	NA	NA	NA	3	-79.3232848070373	168.180731105118	2.66975737016784	0.0381418889781723
rainfallCorvallis	137.999630992996	NA	0.0832489728813737	NA	NA	NA	NA	NA	NA	NA	NA	NA	NA	NA	NA	NA	NA	NA	3	-79.3505654535365	168.235292398117	2.7243186631664	0.0371154186357803
WinterMaxT_2MovAvg	172.366437550792	NA	NA	NA	NA	NA	NA	NA	NA	NA	NA	NA	NA	NA	-0.660530804648025	NA	NA	NA	3	-79.4390741362688	168.412309763581	2.90133602863091	0.0339715631663308
WinterMinT_2Lag	148.079266321429	NA	NA	NA	NA	NA	NA	NA	NA	NA	NA	NA	NA	-0.199519826701799	NA	NA	NA	NA	3	-79.5050407702774	168.544243031599	3.03326929664814	0.0318028899054824
WinterMaxT_1Lag	124.310083025684	NA	NA	NA	NA	NA	NA	NA	NA	NA	0.369820562230018	NA	NA	NA	NA	NA	NA	NA	3	-79.5071230229541	168.548407536952	3.0374338020016	0.0317367371501269
WinterMinT_2MovAvg	148.788484875601	NA	NA	NA	NA	NA	NA	NA	NA	NA	NA	NA	NA	NA	NA	-0.221780082477658	NA	NA	3	-79.5085334650783	168.551228421201	3.04025468624997	0.0316920058720212
WinterMinT_1Lag	146.056462825686	NA	NA	NA	NA	NA	NA	NA	NA	NA	NA	-0.138555612912888	NA	NA	NA	NA	NA	NA	3	-79.5416584882715	168.617478467587	3.10650473263621	0.0306594043356478
WinterMaxT_3MovAvg	156.490079800942	NA	NA	NA	NA	NA	NA	NA	NA	NA	NA	NA	NA	NA	NA	NA	-0.320507557621517	NA	3	-79.5527690211292	168.639699533302	3.12872579835164	0.0303206473862709
MEI	141.376090997622	NA	NA	NA	NA	NA	0.392398149212751	NA	NA	NA	NA	NA	NA	NA	NA	NA	NA	NA	3	-79.5566286942228	168.647418879489	3.13644514453892	0.0302038451535906
CorRain	141.930237102804	NA	NA	-0.156313953525027	NA	NA	NA	NA	NA	NA	NA	NA	NA	NA	NA	NA	NA	NA	3	-79.5672473815611	168.668656254166	3.15768251921548	0.029884816794395
WinterMinT_3MovAvg	144.197444441124	NA	NA	NA	NA	NA	NA	NA	NA	NA	NA	NA	NA	NA	NA	NA	NA	-0.0811222670572903	3	-79.5702527171383	168.674666925321	3.16369319037	0.0297951377166233
PDO	141.597084520854	NA	NA	NA	NA	-0.15045571272552	NA	NA	NA	NA	NA	NA	NA	NA	NA	NA	NA	NA	3	-79.5722518620169	168.678665215078	3.1676914801271	0.0297356324193246
Year	138.586800894863	0.00147651006710999	NA	NA	NA	NA	NA	NA	NA	NA	NA	NA	NA	NA	NA	NA	NA	NA	3	-79.5773873271558	168.688936145356	3.17796241040497	0.0295833175542407
Year_SACrainMar	149.145218170945	-0.00536946622740807	NA	NA	NA	NA	NA	NA	1.29415182426188	NA	NA	NA	NA	NA	NA	NA	NA	NA	4	-78.063698077264	168.83961147592	3.32863774096936	0.0274364642591903
Year_CorAvgT	160.516908324466	0.0178508941079108	NA	NA	-0.982990822755629	NA	NA	NA	NA	NA	NA	NA	NA	NA	NA	NA	NA	NA	4	-78.6045646212154	169.921344563823	4.41037082887198	0.0159747028168423
Year_SACrainApr	276.746932148624	-0.0686320546905183	NA	NA	NA	NA	NA	NA	NA	1.93792225973705	NA	NA	NA	NA	NA	NA	NA	NA	4	-78.8020938938621	170.316403109116	4.8054293741655	0.0131113350153979
Year_SACrainFeb	104.133067209461	0.0180405099579328	NA	NA	NA	NA	NA	0.376949015446205	NA	NA	NA	NA	NA	NA	NA	NA	NA	NA	4	-79.3164648286692	171.34514497873	5.83417124377962	0.00783896013420515
Year_rainfallCorvallis	156.105023397563	-0.00906267541836376	0.0839843104789645	NA	NA	NA	NA	NA	NA	NA	NA	NA	NA	NA	NA	NA	NA	NA	4	-79.3488282628951	171.409871847182	5.89889811223154	0.00758932576462268
Year_WinterMaxT_3MovAvg	92.3703838985103	0.0370537346328777	NA	NA	NA	NA	NA	NA	NA	NA	NA	NA	NA	NA	NA	NA	-0.535647574180663	NA	4	-79.5350337562963	171.782282833984	6.27130909903391	0.0062999220606466
Year_MEI	139.662034246192	0.00085653740865871	NA	NA	NA	NA	0.392187849661534	NA	NA	NA	NA	NA	NA	NA	NA	NA	NA	NA	4	-79.5566132908939	171.82544190318	6.31446816822904	0.00616542904209433
Year_CorRain	133.63614699018	0.00414879100281577	NA	-0.159804888192396	NA	NA	NA	NA	NA	NA	NA	NA	NA	NA	NA	NA	NA	NA	4	-79.5668912575043	171.8459978364	6.3350241014499	0.0061023855029304
Year_WinterMinT_3MovAvg	148.246608652476	-0.00199695412144061	NA	NA	NA	NA	NA	NA	NA	NA	NA	NA	NA	NA	NA	NA	NA	-0.0827338449027868	4	-79.5701718885132	171.852559098418	6.34158536346757	0.00608239863052411
Year_PDO	154.224943509995	-0.0063052843034982	NA	NA	NA	-0.175999903038949	NA	NA	NA	NA	NA	NA	NA	NA	NA	NA	NA	NA	4	-79.5715672825261	171.855349886444	6.34437615149341	0.00607391720673109
