# Supplementary material for: Idiosyncratic changes in spring arrival dates of Pacific Northwest migratory birds
Source: PeerJ. 2019 Nov 7;7:e7999. doi: 10.7717/peerj.7999 (PMC6842555; doi:10.7717/peerj.7999)
Supplement: Supplemental Information 9 [file peerj-07-7999-s009.csv]

	(Intercept)	Year	rainfallCorvallis	CorRain	CorAvgT	PDO	MEI	SACrainFeb	SACrainMar	SACrainApr	WinterMaxT_1Lag	WinterMinT_1Lag	WinterMaxT_2Lag	WinterMinT_2Lag	WinterMaxT_2MovAvg	WinterMinT_2MovAvg	WinterMaxT_3MovAvg	WinterMinT_3MovAvg	df	logLik	BIC	delta	weight
PDO	126.992691072066	NA	NA	NA	NA	-3.10109234320387	NA	NA	NA	NA	NA	NA	NA	NA	NA	NA	NA	NA	3	-78.2183243628075	165.843131373402	0	0.144081354106008
null	125.95652173913	NA	NA	NA	NA	NA	NA	NA	NA	NA	NA	NA	NA	NA	NA	NA	NA	NA	2	-79.9919583189083	166.254905069675	0.411773696272547	0.117271440378437
CorAvgT	198.961844814021	NA	NA	NA	-1.30956358658749	NA	NA	NA	NA	NA	NA	NA	NA	NA	NA	NA	NA	NA	3	-78.8068456325326	167.020173912853	1.17704253945033	0.0799864167306609
SACrainMar	123.340261037527	NA	NA	NA	NA	NA	NA	NA	1.06427301267909	NA	NA	NA	NA	NA	NA	NA	NA	NA	3	-79.2791867071029	167.964856061993	2.1217246885908	0.0498747944960108
Year	-282.776697647947	0.204215667678298	NA	NA	NA	NA	NA	NA	NA	NA	NA	NA	NA	NA	NA	NA	NA	NA	3	-79.3520592229048	168.110601093597	2.26746972019458	0.0463695613704174
rainfallCorvallis	118.041320652135	NA	0.192049650291586	NA	NA	NA	NA	NA	NA	NA	NA	NA	NA	NA	NA	NA	NA	NA	3	-79.4071321888533	168.220747025494	2.37761565209172	0.043884898934114
WinterMaxT_2Lag	70.0672538502583	NA	NA	NA	NA	NA	NA	NA	NA	NA	NA	NA	1.19499224827365	NA	NA	NA	NA	NA	3	-79.5095945512394	168.425671750266	2.58254037686385	0.0396110417190866
Year_CorAvgT	-233.987376797791	0.217680545401562	NA	NA	-1.35859971975224	NA	NA	NA	NA	NA	NA	NA	NA	NA	NA	NA	NA	NA	4	-77.9967479540175	168.535472771752	2.69234139834924	0.0374949928455134
MEI	126.481610276194	NA	NA	NA	NA	NA	-1.81473123252629	NA	NA	NA	NA	NA	NA	NA	NA	NA	NA	NA	3	-79.6204157469207	168.647314141629	2.80418276822638	0.0354557952024167
SACrainFeb	124.457675367453	NA	NA	NA	NA	NA	NA	0.444245702945755	NA	NA	NA	NA	NA	NA	NA	NA	NA	NA	3	-79.7309520852576	168.868386818303	3.02525544490035	0.0317454807513048
Year_PDO	8.18648368966682	0.0593150571451896	NA	NA	NA	-2.83649518334317	NA	NA	NA	NA	NA	NA	NA	NA	NA	NA	NA	NA	4	-78.1709224099215	168.88382168356	3.04069031015715	0.0315014300759516
WinterMaxT_2MovAvg	77.5850088793919	NA	NA	NA	NA	NA	NA	NA	NA	NA	NA	NA	NA	NA	1.0373216848998	NA	NA	NA	3	-79.7502436548693	168.906969957526	3.06383858412372	0.0311389300681753
WinterMinT_2Lag	136.908813430331	NA	NA	NA	NA	NA	NA	NA	NA	NA	NA	NA	NA	-0.334132788041232	NA	NA	NA	NA	3	-79.8447427909095	169.095968229607	3.25283685620417	0.028331086679515
WinterMinT_2MovAvg	135.070277549883	NA	NA	NA	NA	NA	NA	NA	NA	NA	NA	NA	NA	NA	NA	-0.279650087134406	NA	NA	3	-79.9153185536168	169.237119755021	3.3939883816187	0.0264005253165075
SACrainApr	126.577781283458	NA	NA	NA	NA	NA	NA	NA	NA	-0.564558258377872	NA	NA	NA	NA	NA	NA	NA	NA	3	-79.9395047523084	169.285492152404	3.44236077900186	0.0257696568734717
WinterMaxT_3MovAvg	105.706595013045	NA	NA	NA	NA	NA	NA	NA	NA	NA	NA	NA	NA	NA	NA	NA	0.433909034024571	NA	3	-79.9599659528352	169.326414553458	3.48328318005557	0.0252477365239761
WinterMinT_3MovAvg	121.326403073524	NA	NA	NA	NA	NA	NA	NA	NA	NA	NA	NA	NA	NA	NA	NA	NA	0.14158965944628	3	-79.9762611493483	169.359004946484	3.51587357308165	0.024839653621286
WinterMaxT_1Lag	116.508673325238	NA	NA	NA	NA	NA	NA	NA	NA	NA	0.203211203418546	NA	NA	NA	NA	NA	NA	NA	3	-79.9785656889543	169.363614025696	3.52048265229365	0.024782475565569
WinterMinT_1Lag	128.900205467137	NA	NA	NA	NA	NA	NA	NA	NA	NA	NA	-0.0908503722485586	NA	NA	NA	NA	NA	NA	3	-79.9820961261532	169.370674900094	3.52754352669155	0.0246951368545831
CorRain	125.525117412147	NA	NA	0.178202218402001	NA	NA	NA	NA	NA	NA	NA	NA	NA	NA	NA	NA	NA	NA	3	-79.9829902062517	169.372463060291	3.52933168688841	0.024673067291642
Year_SACrainMar	-278.455923014797	0.200769542760394	NA	NA	NA	NA	NA	NA	1.04812695274778	NA	NA	NA	NA	NA	NA	NA	NA	NA	4	-78.620805343789	169.783587551295	3.94045617789232	0.0200885501840012
Year_SACrainFeb	-326.560787337238	0.225175560686064	NA	NA	NA	NA	NA	0.543380774925613	NA	NA	NA	NA	NA	NA	NA	NA	NA	NA	4	-78.9436363315012	170.429249526719	4.58611815331668	0.014546043357698
Year_rainfallCorvallis	-220.771211985361	0.170021553530346	0.156093467289096	NA	NA	NA	NA	NA	NA	NA	NA	NA	NA	NA	NA	NA	NA	NA	4	-78.9658612308019	170.47369932532	4.63056795191812	0.0142263250229415
Year_SACrainApr	-387.945706652187	0.257550187936028	NA	NA	NA	NA	NA	NA	NA	-1.43477275570227	NA	NA	NA	NA	NA	NA	NA	NA	4	-79.0352648033323	170.612506470381	4.76937509697891	0.0132724512256571
Year_MEI	-259.538435441196	0.192841384220267	NA	NA	NA	NA	-1.63429993212313	NA	NA	NA	NA	NA	NA	NA	NA	NA	NA	NA	4	-79.0363208776221	170.614618618961	4.77148724555852	0.0132584419298856
Year_WinterMaxT_3MovAvg	-383.354706624173	0.282255977024187	NA	NA	NA	NA	NA	NA	NA	NA	NA	NA	NA	NA	NA	NA	-1.19176437267144	NA	4	-79.1922557980285	170.926488459774	5.08335708637131	0.0113441200898166
Year_WinterMinT_3MovAvg	-317.479296191192	0.216534813429481	NA	NA	NA	NA	NA	NA	NA	NA	NA	NA	NA	NA	NA	NA	NA	0.307210987991469	4	-79.27613069016	171.094238244037	5.25110687063417	0.0104314435575106
Year_CorRain	-284.992347092947	0.205388833125205	NA	-0.0546975744956497	NA	NA	NA	NA	NA	NA	NA	NA	NA	NA	NA	NA	NA	NA	4	-79.3511879973005	171.244352858318	5.40122148491523	0.00967714922784306
