# Supplementary material for: Idiosyncratic changes in spring arrival dates of Pacific Northwest migratory birds
Source: PeerJ. 2019 Nov 7;7:e7999. doi: 10.7717/peerj.7999 (PMC6842555; doi:10.7717/peerj.7999)
Supplement: Supplemental Information 10 [file peerj-07-7999-s010.csv]

	(Intercept)	Year	rainfallCorvallis	CorRain	CorAvgT	PDO	MEI	SACrainFeb	SACrainMar	SACrainApr	WinterMaxT_1Lag	WinterMinT_1Lag	WinterMaxT_2Lag	WinterMinT_2Lag	WinterMaxT_2MovAvg	WinterMinT_2MovAvg	WinterMaxT_3MovAvg	WinterMinT_3MovAvg	df	logLik	BIC	delta	weight
SACrainMar	113.047950343585	NA	NA	NA	NA	NA	NA	NA	0.992778303654612	NA	NA	NA	NA	NA	NA	NA	NA	NA	3	-62.6260367623951	134.786235015834	0	0.245913679896
WinterMinT_3MovAvg	141.507105302016	NA	NA	NA	NA	NA	NA	NA	NA	NA	NA	NA	NA	NA	NA	NA	NA	-0.795674794962818	3	-63.2146269375363	135.963415366117	1.17718035028255	0.136508980610812
WinterMinT_2Lag	133.952144898374	NA	NA	NA	NA	NA	NA	NA	NA	NA	NA	NA	NA	-0.564409305152931	NA	NA	NA	NA	3	-63.6485411898921	136.831243870828	2.04500885499411	0.0884534258692745
SACrainFeb	117.342078688163	NA	NA	NA	NA	NA	NA	-0.544107455962263	NA	NA	NA	NA	NA	NA	NA	NA	NA	NA	3	-63.7529311265742	137.040023744192	2.25378872835824	0.0796853867227598
null	115.458333333333	NA	NA	NA	NA	NA	NA	NA	NA	NA	NA	NA	NA	NA	NA	NA	NA	NA	2	-65.6500736490854	137.656254958867	2.87001994303264	0.0585552415171696
Year_SACrainMar	167.372628195841	-0.0271496726190343	NA	NA	NA	NA	NA	NA	0.996322278908932	NA	NA	NA	NA	NA	NA	NA	NA	NA	4	-62.5624439208625	137.837103163117	3.05086814728281	0.0534927700748097
WinterMinT_2MovAvg	132.958050497748	NA	NA	NA	NA	NA	NA	NA	NA	NA	NA	NA	NA	NA	NA	-0.535557620484335	NA	NA	3	-64.2979270090056	138.130015509055	3.34378049322103	0.0462051069957567
Year_WinterMinT_3MovAvg	257.537069768597	-0.0572232944029643	NA	NA	NA	NA	NA	NA	NA	NA	NA	NA	NA	NA	NA	NA	NA	-0.841855021396664	4	-62.952423003926	138.617061329244	3.8308263134098	0.0362184052852602
CorRain	117.621802633315	NA	NA	-0.870319530666409	NA	NA	NA	NA	NA	NA	NA	NA	NA	NA	NA	NA	NA	NA	3	-64.5978296602244	138.729820811493	3.94358579565878	0.0342329175215963
MEI	116.089438001299	NA	NA	NA	NA	NA	-1.49565636725389	NA	NA	NA	NA	NA	NA	NA	NA	NA	NA	NA	3	-64.6452464931737	138.824654477391	4.03841946155725	0.0326475837648312
PDO	115.760247386908	NA	NA	NA	NA	-0.819676163551512	NA	NA	NA	NA	NA	NA	NA	NA	NA	NA	NA	NA	3	-65.1490190582756	139.832199607595	5.04596459176102	0.0197271978229623
Year_SACrainFeb	211.099098372334	-0.0468090517497303	NA	NA	NA	NA	NA	-0.567331873829236	NA	NA	NA	NA	NA	NA	NA	NA	NA	NA	4	-63.5837352977577	139.879685916907	5.09345090107317	0.019264328645867
WinterMinT_1Lag	123.737969472956	NA	NA	NA	NA	NA	NA	NA	NA	NA	NA	-0.254095648976159	NA	NA	NA	NA	NA	NA	3	-65.2603522292682	140.05486594958	5.26863093374638	0.017648752707458
CorAvgT	125.055171715516	NA	NA	NA	-0.172462838766288	NA	NA	NA	NA	NA	NA	NA	NA	NA	NA	NA	NA	NA	3	-65.5573546111857	140.648870713415	5.86263569758123	0.0131137687889817
WinterMaxT_2MovAvg	102.82295427158	NA	NA	NA	NA	NA	NA	NA	NA	NA	NA	NA	NA	NA	0.270758122747019	NA	NA	NA	3	-65.5760672790258	140.686296049095	5.90006103326152	0.0128706569193757
SACrainApr	115.802093511501	NA	NA	NA	NA	NA	NA	NA	NA	-0.310626667018791	NA	NA	NA	NA	NA	NA	NA	NA	3	-65.5798479260522	140.693857343148	5.90762232731419	0.0128220893747872
WinterMaxT_3MovAvg	129.405455923222	NA	NA	NA	NA	NA	NA	NA	NA	NA	NA	NA	NA	NA	NA	NA	-0.299038978718318	NA	3	-65.5814164064085	140.696994303861	5.91075928802692	0.0128019939432398
WinterMaxT_2Lag	105.649399001653	NA	NA	NA	NA	NA	NA	NA	NA	NA	NA	NA	0.209866656334146	NA	NA	NA	NA	NA	3	-65.5847497906952	140.703661072434	5.91742605660031	0.0127593910231916
rainfallCorvallis	116.34741489957	NA	-0.0208962116748677	NA	NA	NA	NA	NA	NA	NA	NA	NA	NA	NA	NA	NA	NA	NA	3	-65.6047924379266	140.743746366897	5.95751135106318	0.0125062047867514
WinterMaxT_1Lag	108.778323155422	NA	NA	NA	NA	NA	NA	NA	NA	NA	0.143364949569799	NA	NA	NA	NA	NA	NA	NA	3	-65.6163987317974	140.766958954639	5.98072393880474	0.0123618931802123
Year	159.244071588368	-0.0218791946308732	NA	NA	NA	NA	NA	NA	NA	NA	NA	NA	NA	NA	NA	NA	NA	NA	3	-65.6179940985113	140.770149688066	5.98391467223243	0.012342187150664
Year_CorRain	132.475807382959	-0.00743012921541617	NA	-0.864067565782295	NA	NA	NA	NA	NA	NA	NA	NA	NA	NA	NA	NA	NA	NA	4	-64.5938524573349	141.899920236062	7.11368522022772	0.00701561212722566
Year_MEI	155.156678781378	-0.0195224301373309	NA	NA	NA	NA	-1.49086316353034	NA	NA	NA	NA	NA	NA	NA	NA	NA	NA	NA	4	-64.6174907748486	141.947196871089	7.16096185525507	0.00685171956388503
Year_PDO	257.56169619779	-0.0708036453502843	NA	NA	NA	-1.10651839058775	NA	NA	NA	NA	NA	NA	NA	NA	NA	NA	NA	NA	4	-64.8583784533139	142.42897222802	7.64273721218566	0.00538497125990902
Year_CorAvgT	162.938502054986	-0.0191207027508575	NA	NA	-0.165598424706837	NA	NA	NA	NA	NA	NA	NA	NA	NA	NA	NA	NA	NA	4	-65.5328195301569	143.777854381706	8.99161936587166	0.00274332557153803
Year_SACrainApr	139.97723033348	-0.0121023467404186	NA	NA	NA	NA	NA	NA	NA	-0.270249023389309	NA	NA	NA	NA	NA	NA	NA	NA	4	-65.571175109846	143.854565541084	9.06833052524979	0.00264009609732543
Year_rainfallCorvallis	155.214618315652	-0.0194550242882678	-0.0193176479328386	NA	NA	NA	NA	NA	NA	NA	NA	NA	NA	NA	NA	NA	NA	NA	4	-65.5795983474053	143.871412016202	9.0851770003685	0.0026179513369393
Year_WinterMaxT_3MovAvg	135.087525794895	-0.00328357622766638	NA	NA	NA	NA	NA	NA	NA	NA	NA	NA	NA	NA	NA	NA	-0.279974000491628	NA	4	-65.5809705498093	143.87415642101	9.08792140517636	0.00261436144141631
