# Supplementary material for: Idiosyncratic changes in spring arrival dates of Pacific Northwest migratory birds
Source: PeerJ. 2019 Nov 7;7:e7999. doi: 10.7717/peerj.7999 (PMC6842555; doi:10.7717/peerj.7999)
Supplement: Supplemental Information 13 [file peerj-07-7999-s013.csv]

	(Intercept)	Year	rainfallCorvallis	CorRain	CorAvgT	PDO	MEI	SACrainFeb	SACrainMar	SACrainApr	WinterMaxT_1Lag	WinterMinT_1Lag	WinterMaxT_2Lag	WinterMinT_2Lag	WinterMaxT_2MovAvg	WinterMinT_2MovAvg	WinterMaxT_3MovAvg	WinterMinT_3MovAvg	df	logLik	BIC	delta	weight
WinterMaxT_2MovAvg	445.467858207822	NA	NA	NA	NA	NA	NA	NA	NA	NA	NA	NA	NA	NA	-6.55314180860832	NA	NA	NA	3	-79.20217724468	167.810837137148	0	0.465774985351894
Year_SACrainMar	1388.37238414809	-0.626929998395859	NA	NA	NA	NA	NA	NA	2.33924448993998	NA	NA	NA	NA	NA	NA	NA	NA	NA	4	-78.5773841182277	169.696745100172	1.88590796302449	0.181408006132205
WinterMaxT_1Lag	329.359535778685	NA	NA	NA	NA	NA	NA	NA	NA	NA	-4.07943113459836	NA	NA	NA	NA	NA	NA	NA	3	-81.0804424754239	171.567367598635	3.75653046148778	0.0711960559350974
WinterMaxT_3MovAvg	427.320809031937	NA	NA	NA	NA	NA	NA	NA	NA	NA	NA	NA	NA	NA	NA	NA	-6.17182342830337	NA	3	-81.3195034770719	172.045489601931	4.23465246478364	0.05605741431058
Year_WinterMaxT_3MovAvg	1047.60473088215	-0.354960961007337	NA	NA	NA	NA	NA	NA	NA	NA	NA	NA	NA	NA	NA	NA	-4.23910951066646	NA	4	-80.2363105586041	173.014597980925	5.20376084377722	0.034529783158048
Year	1339.79351490888	-0.599857759983151	NA	NA	NA	NA	NA	NA	NA	NA	NA	NA	NA	NA	NA	NA	NA	NA	3	-81.8381934954627	173.082869638713	5.27203250156535	0.0333709714118879
Year_SACrainFeb	1230.91991706328	-0.547238011826637	NA	NA	NA	NA	NA	1.01830310641714	NA	NA	NA	NA	NA	NA	NA	NA	NA	NA	4	-80.6225606734826	173.787098210682	5.97626107353435	0.0234664588044175
Year_WinterMinT_3MovAvg	1549.47279334481	-0.683089619477546	NA	NA	NA	NA	NA	NA	NA	NA	NA	NA	NA	NA	NA	NA	NA	-1.31218497169977	4	-80.7507340762555	174.043445016228	6.23260787908009	0.0206434631314994
Year_MEI	1466.75997441883	-0.663939710216563	NA	NA	NA	NA	3.77763913568789	NA	NA	NA	NA	NA	NA	NA	NA	NA	NA	NA	4	-80.9592828816535	174.460542627024	6.64970548987614	0.0167575668503167
Year_CorAvgT	1309.09096833751	-0.554268338373618	NA	NA	-1.09051528069077	NA	NA	NA	NA	NA	NA	NA	NA	NA	NA	NA	NA	NA	4	-81.1876344058781	174.917245675473	7.10640853832524	0.0133364166077629
Year_CorRain	1362.18197384846	-0.612850768644196	NA	1.42984109457919	NA	NA	NA	NA	NA	NA	NA	NA	NA	NA	NA	NA	NA	NA	4	-81.3215741676162	175.185125198949	7.37428806180151	0.0116646000966326
WinterMaxT_2Lag	308.786552639891	NA	NA	NA	NA	NA	NA	NA	NA	NA	NA	NA	-3.62323669916589	NA	NA	NA	NA	NA	3	-83.0405175335688	175.487517714925	7.6766805777776	0.0100278113176615
WinterMinT_1Lag	189.857720374674	NA	NA	NA	NA	NA	NA	NA	NA	NA	NA	-1.5599301380854	NA	NA	NA	NA	NA	NA	3	-83.1133186933509	175.633120034489	7.82228289734181	0.00932371546955011
Year_PDO	1289.73564657838	-0.574973321383252	NA	NA	NA	0.734267958702586	NA	NA	NA	NA	NA	NA	NA	NA	NA	NA	NA	NA	4	-81.7762389036873	176.094454671091	8.28361753394373	0.00740306339234329
Year_rainfallCorvallis	1348.08483058885	-0.605153503987283	0.0540269063816915	NA	NA	NA	NA	NA	NA	NA	NA	NA	NA	NA	NA	NA	NA	NA	4	-81.7805814370998	176.103139737916	8.29230260076864	0.00737098504326889
Year_SACrainApr	1381.5805923003	-0.621104297196371	NA	NA	NA	NA	NA	NA	NA	0.650665132990232	NA	NA	NA	NA	NA	NA	NA	NA	4	-81.7864916179551	176.114960099627	8.30412296247917	0.00732754967047
SACrainMar	133.723292821906	NA	NA	NA	NA	NA	NA	NA	2.17972229438917	NA	NA	NA	NA	NA	NA	NA	NA	NA	3	-83.3752785638622	176.157039775512	8.34620263836439	0.00717498975862504
null	138.95652173913	NA	NA	NA	NA	NA	NA	NA	NA	NA	NA	NA	NA	NA	NA	NA	NA	NA	2	-85.3573871670312	176.985762765921	9.17492562877322	0.00474096091133172
SACrainFeb	134.437967943541	NA	NA	NA	NA	NA	NA	1.30136159903038	NA	NA	NA	NA	NA	NA	NA	NA	NA	NA	3	-83.8355209525049	177.077524552797	9.26668741564967	0.00452835593621459
CorAvgT	226.197823142626	NA	NA	NA	-1.57093081678572	NA	NA	NA	NA	NA	NA	NA	NA	NA	NA	NA	NA	NA	3	-84.3080831552103	178.022648958208	10.2118118210606	0.00282299038390696
WinterMinT_2MovAvg	179.886991467603	NA	NA	NA	NA	NA	NA	NA	NA	NA	NA	NA	NA	NA	NA	-1.24815592488603	NA	NA	3	-84.3914213562172	178.189325360222	10.3784882230744	0.0025972638926023
PDO	138.137724057146	NA	NA	NA	NA	2.47957165051155	NA	NA	NA	NA	NA	NA	NA	NA	NA	NA	NA	NA	3	-84.763985041397	178.934452730582	11.123615593434	0.00178942592610505
CorRain	135.985364799848	NA	NA	1.1729593134826	NA	NA	NA	NA	NA	NA	NA	NA	NA	NA	NA	NA	NA	NA	3	-85.103297254089	179.613077155965	11.8022400188179	0.00127453657767378
WinterMinT_3MovAvg	156.936836025075	NA	NA	NA	NA	NA	NA	NA	NA	NA	NA	NA	NA	NA	NA	NA	NA	-0.54792207294772	3	-85.2130832406819	179.832649129151	12.0218119920038	0.00114201775392331
MEI	138.357231580849	NA	NA	NA	NA	NA	1.7186625486862	NA	NA	NA	NA	NA	NA	NA	NA	NA	NA	NA	3	-85.2204421757662	179.84736699932	12.0365298621723	0.0011336445660668
SACrainApr	140.194824863391	NA	NA	NA	NA	NA	NA	NA	NA	-1.08046175485552	NA	NA	NA	NA	NA	NA	NA	NA	3	-85.2415736609432	179.889629969674	12.0787928325263	0.0011099403078809
WinterMinT_2Lag	147.066416103871	NA	NA	NA	NA	NA	NA	NA	NA	NA	NA	NA	NA	-0.246089410782974	NA	NA	NA	NA	3	-85.3135755915781	180.033633830944	12.2227966937962	0.0010328317549664
rainfallCorvallis	138.112214648448	NA	0.019746258590535	NA	NA	NA	NA	NA	NA	NA	NA	NA	NA	NA	NA	NA	NA	NA	3	-85.3517012623787	180.109885172545	12.2990480353973	0.00099419554706816
