# Supplementary material for: Idiosyncratic changes in spring arrival dates of Pacific Northwest migratory birds
Source: PeerJ. 2019 Nov 7;7:e7999. doi: 10.7717/peerj.7999 (PMC6842555; doi:10.7717/peerj.7999)
Supplement: Supplemental Information 17 [file peerj-07-7999-s017.csv]

	(Intercept)	Year	rainfallCorvallis	CorRain	CorAvgT	PDO	MEI	SACrainFeb	SACrainMar	SACrainApr	WinterMaxT_1Lag	WinterMinT_1Lag	WinterMaxT_2Lag	WinterMinT_2Lag	WinterMaxT_2MovAvg	WinterMinT_2MovAvg	WinterMaxT_3MovAvg	WinterMinT_3MovAvg	df	logLik	BIC	delta	weight
WinterMinT_1Lag	12.1947851308965	NA	NA	NA	NA	NA	NA	NA	NA	NA	NA	2.18190847391958	NA	NA	NA	NA	NA	NA	3	-98.2152291827458	205.964619856536	0	0.132918219513004
WinterMaxT_1Lag	-104.084038484027	NA	NA	NA	NA	NA	NA	NA	NA	NA	4.02141730387834	NA	NA	NA	NA	NA	NA	NA	3	-98.3350092611211	206.204180013286	0.239560156750429	0.117913814244481
null	83.2916666666667	NA	NA	NA	NA	NA	NA	NA	NA	NA	NA	NA	NA	NA	NA	NA	NA	NA	2	-99.9567643367267	206.269636334149	0.305016477613833	0.114117179338458
WinterMinT_2MovAvg	19.2254046750331	NA	NA	NA	NA	NA	NA	NA	NA	NA	NA	NA	NA	NA	NA	1.96067024987908	NA	NA	3	-98.931582251237	207.397325993518	1.43270613698229	0.0649346240382148
PDO	84.5609614523953	NA	NA	NA	NA	-4.1222022811213	NA	NA	NA	NA	NA	NA	NA	NA	NA	NA	NA	NA	3	-99.1217436382135	207.777648767471	1.81302891093523	0.0536896149537238
WinterMinT_3MovAvg	22.6198615586328	NA	NA	NA	NA	NA	NA	NA	NA	NA	NA	NA	NA	NA	NA	NA	NA	1.85325535297399	3	-99.2508316293886	208.035824749821	2.07120489328548	0.0471876214875447
WinterMaxT_2MovAvg	-76.0807299464323	NA	NA	NA	NA	NA	NA	NA	NA	NA	NA	NA	NA	NA	3.41512278450542	NA	NA	NA	3	-99.2642136370434	208.062588765131	2.09796890859511	0.0465603627270193
rainfallCorvallis	70.4214567697446	NA	0.302490390667422	NA	NA	NA	NA	NA	NA	NA	NA	NA	NA	NA	NA	NA	NA	NA	3	-99.4011128743955	208.336387239835	2.37176738329921	0.0406033411099196
SACrainFeb	87.2725803634363	NA	NA	NA	NA	NA	NA	-1.14986073802469	NA	NA	NA	NA	NA	NA	NA	NA	NA	NA	3	-99.4988301674593	208.531821825962	2.56720196942689	0.0368233834605895
SACrainMar	79.3224069884827	NA	NA	NA	NA	NA	NA	NA	1.63484181013241	NA	NA	NA	NA	NA	NA	NA	NA	NA	3	-99.5338120751468	208.601785641338	2.63716578480199	0.0355575018260879
Year_PDO	1237.19100755463	-0.575555215856344	NA	NA	NA	-6.72086112730917	NA	NA	NA	NA	NA	NA	NA	NA	NA	NA	NA	NA	4	-98.0568959520446	208.826007225481	2.86138736894554	0.0317864584359931
WinterMinT_2Lag	57.6770255438442	NA	NA	NA	NA	NA	NA	NA	NA	NA	NA	NA	NA	0.781728620248441	NA	NA	NA	NA	3	-99.7522775630526	209.038716617149	3.07409676061357	0.0285793854054447
MEI	83.3469102682483	NA	NA	NA	NA	NA	-2.09454413579648	NA	NA	NA	NA	NA	NA	NA	NA	NA	NA	NA	3	-99.7732171423057	209.080595775655	3.11597591911973	0.0279871671392088
Year	483.810290827745	-0.200134228187921	NA	NA	NA	NA	NA	NA	NA	NA	NA	NA	NA	NA	NA	NA	NA	NA	3	-99.8020881709919	209.138337833028	3.17371797649213	0.0271907015471781
CorAvgT	38.5739571035024	NA	NA	NA	0.889020070838257	NA	NA	NA	NA	NA	NA	NA	NA	NA	NA	NA	NA	NA	3	-99.8180560018686	209.170273494781	3.20565363824556	0.0267599730750741
WinterMaxT_3MovAvg	37.9072713893872	NA	NA	NA	NA	NA	NA	NA	NA	NA	NA	NA	NA	NA	NA	NA	0.973082664613909	NA	3	-99.9151310162238	209.364423523491	3.39980366695596	0.024284352544873
CorRain	81.5769212130574	NA	NA	0.636170828360233	NA	NA	NA	NA	NA	NA	NA	NA	NA	NA	NA	NA	NA	NA	3	-99.9203641856393	209.374889862322	3.41027000578694	0.0241576003609565
SACrainApr	84.267419520955	NA	NA	NA	NA	NA	NA	NA	NA	-0.881704386405053	NA	NA	NA	NA	NA	NA	NA	NA	3	-99.9243766450493	209.382914781142	3.4182949246069	0.0240608631768656
WinterMaxT_2Lag	73.9873724251646	NA	NA	NA	NA	NA	NA	NA	NA	NA	NA	NA	0.199069649768837	NA	NA	NA	NA	NA	3	-99.9534032958914	209.440968082827	3.47634822629121	0.0233724957342905
Year_rainfallCorvallis	550.977657218017	-0.240542970162099	0.322007837958755	NA	NA	NA	NA	NA	NA	NA	NA	NA	NA	NA	NA	NA	NA	NA	4	-99.1687142083086	211.049643738009	5.08502388147338	0.0104564823585405
Year_WinterMinT_3MovAvg	279.359222611426	-0.126617913828495	NA	NA	NA	NA	NA	NA	NA	NA	NA	NA	NA	NA	NA	NA	NA	1.75107242219051	4	-99.1876345442384	211.087484409869	5.12286455333316	0.0102605020526532
Year_SACrainFeb	600.530011131679	-0.25624847844668	NA	NA	NA	NA	NA	-1.27699900549143	NA	NA	NA	NA	NA	NA	NA	NA	NA	NA	4	-99.2400195164697	211.192254354331	5.22763449779558	0.00973684165161865
Year_SACrainMar	497.370750160254	-0.208926699701946	NA	NA	NA	NA	NA	NA	1.6621140010019	NA	NA	NA	NA	NA	NA	NA	NA	NA	4	-99.3591751481903	211.430565617772	5.46594576123692	0.00864309872808523
Year_WinterMaxT_3MovAvg	783.665331752989	-0.430961514712899	NA	NA	NA	NA	NA	NA	NA	NA	NA	NA	NA	NA	NA	NA	3.4753153904191	NA	4	-99.4675565589645	211.647328439321	5.68270858278527	0.00775532540816269
Year_MEI	552.843388044138	-0.234597518810212	NA	NA	NA	NA	-2.40518894918036	NA	NA	NA	NA	NA	NA	NA	NA	NA	NA	NA	4	-99.5609955001756	211.834206321743	5.86958646520753	0.00706350096237232
Year_CorRain	588.729469442765	-0.254105938909104	NA	1.14702394771876	NA	NA	NA	NA	NA	NA	NA	NA	NA	NA	NA	NA	NA	NA	4	-99.693232625793	212.098680572978	6.13406071644235	0.00618856782014337
Year_CorAvgT	345.58947515435	-0.146139379587175	NA	NA	0.599674451513948	NA	NA	NA	NA	NA	NA	NA	NA	NA	NA	NA	NA	NA	4	-99.7497431855111	212.211701692414	6.24708183587842	0.00584854627451704
Year_SACrainApr	466.460416228375	-0.191330134012211	NA	NA	NA	NA	NA	NA	NA	-0.243360424491853	NA	NA	NA	NA	NA	NA	NA	NA	4	-99.7998932301104	212.312001781613	6.34738192507712	0.00556247462497996
