# Supplementary material for: Idiosyncratic changes in spring arrival dates of Pacific Northwest migratory birds
Source: PeerJ. 2019 Nov 7;7:e7999. doi: 10.7717/peerj.7999 (PMC6842555; doi:10.7717/peerj.7999)
Supplement: Supplemental Information 19 [file peerj-07-7999-s019.csv]

	(Intercept)	Year	rainfallCorvallis	CorRain	CorAvgT	PDO	MEI	SACrainFeb	SACrainMar	SACrainApr	WinterMaxT_1Lag	WinterMinT_1Lag	WinterMaxT_2Lag	WinterMinT_2Lag	WinterMaxT_2MovAvg	WinterMinT_2MovAvg	WinterMaxT_3MovAvg	WinterMinT_3MovAvg	df	logLik	BIC	delta	weight
Year_WinterMinT_3MovAvg	1032.80036859188	-0.432125535163464	NA	NA	NA	NA	NA	NA	NA	NA	NA	NA	NA	NA	NA	NA	NA	-1.29592082621774	4	-73.6581268499399	160.028469021272	0	0.187077901642067
Year_CorAvgT	910.429074670903	-0.356111691491952	NA	NA	-1.29708217876691	NA	NA	NA	NA	NA	NA	NA	NA	NA	NA	NA	NA	NA	4	-73.8897423368068	160.491699995005	0.463230973733829	0.148399747546233
Year_SACrainMar	892.162427461332	-0.384636903294261	NA	NA	NA	NA	NA	NA	1.30791498457854	NA	NA	NA	NA	NA	NA	NA	NA	NA	4	-74.166781330019	161.04577798143	1.01730896015832	0.112490709537853
Year_MEI	872.932221914408	-0.37278276757674	NA	NA	NA	NA	-3.12204988989638	NA	NA	NA	NA	NA	NA	NA	NA	NA	NA	NA	4	-74.3802106506569	161.472636622706	1.44416760143406	0.0908710361059669
Year	881.49172259508	-0.37771812080537	NA	NA	NA	NA	NA	NA	NA	NA	NA	NA	NA	NA	NA	NA	NA	NA	3	-76.2542368227784	162.042635136601	2.014166115329	0.0683363652339485
WinterMaxT_3MovAvg	285.826268563641	NA	NA	NA	NA	NA	NA	NA	NA	NA	NA	NA	NA	NA	NA	NA	-3.43575410549811	NA	3	-76.4635767776112	162.461315046266	2.43284602499469	0.0554289546277034
Year_WinterMaxT_3MovAvg_SACrainMar	753.479748740991	-0.277975832536435	NA	NA	NA	NA	NA	NA	1.21065526234781	NA	NA	NA	NA	NA	NA	NA	-1.59813350307701	NA	5	-73.5742420184024	163.038753188544	3.01028416727291	0.0415286285005719
Year_WinterMaxT_3MovAvg_CorAvgT	807.683347797396	-0.281445917387956	NA	NA	-1.16621315482379	NA	NA	NA	NA	NA	NA	NA	NA	NA	NA	NA	-1.15698292673313	NA	5	-73.5959234504293	163.082116052598	3.05364703132668	0.040637919183438
Year_WinterMaxT_3MovAvg_WinterMinT_3MovAvg	1083.61958024764	-0.466048816233633	NA	NA	NA	NA	NA	NA	NA	NA	NA	NA	NA	NA	NA	NA	0.442157114681888	-1.40443006260218	5	-73.631238294948	163.152745741636	3.12427672036409	0.0392278422533762
Year_WinterMaxT_3MovAvg	706.971012067507	-0.243372732016212	NA	NA	NA	NA	NA	NA	NA	NA	NA	NA	NA	NA	NA	NA	-2.0226923962054	NA	4	-75.43142941345	163.575074148292	3.54660512702017	0.0317604737528052
Year_SACrainApr	984.095825582462	-0.429783983318753	NA	NA	NA	NA	NA	NA	NA	1.43919069354668	NA	NA	NA	NA	NA	NA	NA	NA	4	-75.6952244230448	164.102664167481	4.07419514620992	0.0243962039242995
CorAvgT	204.87462814659	NA	NA	NA	-1.42492779896531	NA	NA	NA	NA	NA	NA	NA	NA	NA	NA	NA	NA	NA	3	-77.5248008326099	164.583763156264	4.55529413499212	0.0191801914073135
Year_SACrainFeb	908.110748943502	-0.39051550159304	NA	NA	NA	NA	NA	-0.291231593817811	NA	NA	NA	NA	NA	NA	NA	NA	NA	NA	4	-76.0492703531292	164.81075602765	4.7822870063786	0.0171222983862937
Year_PDO	950.193507635528	-0.411905247578415	NA	NA	NA	-0.773206115540932	NA	NA	NA	NA	NA	NA	NA	NA	NA	NA	NA	NA	4	-76.1051806374677	164.922576596327	4.89410757505567	0.0161912557646955
Year_CorRain	890.916562503636	-0.382805493199932	NA	0.304229606192706	NA	NA	NA	NA	NA	NA	NA	NA	NA	NA	NA	NA	NA	NA	4	-76.2039750684577	165.120165458307	5.09169643703567	0.0146681268450252
Year_rainfallCorvallis	887.265875623003	-0.381191924712896	0.0276819329458441	NA	NA	NA	NA	NA	NA	NA	NA	NA	NA	NA	NA	NA	NA	NA	4	-76.2217488819173	165.155713085226	5.12724406395481	0.0144097215213565
null	125.583333333333	NA	NA	NA	NA	NA	NA	NA	NA	NA	NA	NA	NA	NA	NA	NA	NA	NA	2	-79.6657597916638	165.687627244024	5.65915822275204	0.0110446484231406
MEI	126.93932875834	NA	NA	NA	NA	NA	-3.21357659723025	NA	NA	NA	NA	NA	NA	NA	NA	NA	NA	NA	3	-78.1953418887649	165.924845268574	5.89637624730219	0.00980935961624915
SACrainMar	122.529726737688	NA	NA	NA	NA	NA	NA	NA	1.25770650927569	NA	NA	NA	NA	NA	NA	NA	NA	NA	3	-78.251380008616	166.036921508276	6.00845248700435	0.00927477985522069
WinterMaxT_2Lag	197.885587894611	NA	NA	NA	NA	NA	NA	NA	NA	NA	NA	NA	-1.54693995260915	NA	NA	NA	NA	NA	3	-78.5111602362985	166.556481963641	6.52801294236937	0.00715290555324754
WinterMaxT_2MovAvg	209.671086632986	NA	NA	NA	NA	NA	NA	NA	NA	NA	NA	NA	NA	NA	-1.80188042781753	NA	NA	NA	3	-78.6039483478945	166.742058186833	6.71358916556139	0.0065190622157079
WinterMinT_3MovAvg	156.592331056706	NA	NA	NA	NA	NA	NA	NA	NA	NA	NA	NA	NA	NA	NA	NA	NA	-0.947187757457864	3	-78.6527557233794	166.839672937803	6.81120391653113	0.00620852382384506
WinterMinT_2MovAvg	149.889115827568	NA	NA	NA	NA	NA	NA	NA	NA	NA	NA	NA	NA	NA	NA	-0.743848995633637	NA	NA	3	-78.8729565034978	167.280074498039	7.25160547676788	0.0049814567983333
WinterMinT_2Lag	146.152358074423	NA	NA	NA	NA	NA	NA	NA	NA	NA	NA	NA	NA	-0.627742362409339	NA	NA	NA	NA	3	-78.9347245260769	167.403610543198	7.37514152192617	0.00468307223706526
WinterMinT_1Lag	142.041844817016	NA	NA	NA	NA	NA	NA	NA	NA	NA	NA	-0.505099026829792	NA	NA	NA	NA	NA	NA	3	-79.1850253169235	167.904212124891	7.87574310361927	0.0036460834519218
WinterMaxT_1Lag	163.707714411921	NA	NA	NA	NA	NA	NA	NA	NA	NA	-0.81821731182164	NA	NA	NA	NA	NA	NA	NA	3	-79.3201846816127	168.174530854269	8.14606183299762	0.00318513348902932
PDO	125.253483849174	NA	NA	NA	NA	0.895518961519415	NA	NA	NA	NA	NA	NA	NA	NA	NA	NA	NA	NA	3	-79.4821957801139	168.498553051272	8.47008403000009	0.00270873869792491
SACrainFeb	125.920804879025	NA	NA	NA	NA	NA	NA	-0.0974764363534311	NA	NA	NA	NA	NA	NA	NA	NA	NA	NA	3	-79.6482321017723	168.830625694588	8.80215667331694	0.00229434357760322
rainfallCorvallis	125.721512642253	NA	-0.0032476481325472	NA	NA	NA	NA	NA	NA	NA	NA	NA	NA	NA	NA	NA	NA	NA	3	-79.6654202732994	168.865002037643	8.83653301637119	0.00225524498588029
CorRain	125.627770165581	NA	NA	-0.0178760304045605	NA	NA	NA	NA	NA	NA	NA	NA	NA	NA	NA	NA	NA	NA	3	-79.6656276142964	168.865416719637	8.83694769836504	0.00225477742961008
SACrainApr	125.577488314363	NA	NA	NA	NA	NA	NA	NA	NA	0.00528164364750557	NA	NA	NA	NA	NA	NA	NA	NA	3	-79.6657534959889	168.865668483022	8.83719946175003	0.00225449361227511
