# Supplementary material for: Idiosyncratic changes in spring arrival dates of Pacific Northwest migratory birds
Source: PeerJ. 2019 Nov 7;7:e7999. doi: 10.7717/peerj.7999 (PMC6842555; doi:10.7717/peerj.7999)
Supplement: Supplemental Information 21 — Four-letter codes and English names of species included in the article. [file peerj-07-7999-s021.xlsx]

## Sheet: ArrivalBBSTrend_TraitsTable
Species codes	Species English name
amgo	American Goldfinch
bhgr	Black-headed Grosbeak
btyw	Black-throated Gray Warbler
cedw	Cedar Waxwing
hafl	Hammond's Flycatcher
hewa	Hermit Warbler
howr	House Wren
mgwa	Macgillivray's Warbler
osfl	Olive-sided Flycatcher
ocwa	Orange-crowned Warbler
psfl	Pacific-slope Flycatcher
ruhu	Rufous Hummingbird
swth	Swainson's Thrush
vgsw	Violet-green Swallow
wavi	Warbling Vireo
weta	Western Tanager
wifl	Willow Flycatcher
wiwa	Wilson's Warbler
	Scientific names are in Table 1
